# Supplementary material
Source: HighWire-hosted journal article supplement (https://bmjopen.bmj.com/content/12/6/e056393)
Supplement: inline-supplementary-material-1 [file inline-supplementary-material-1.pdf]

## Online-Only Supplements

### List of Online-Only material:

eText 1: Survey Instrument

eTable 1: Variables obtained from Statistics Denmark

eTable 2. Comparison of Baseline Characteristics Between Respondents and Non-respondents

eTable 3. Subgroup Analysis of Professions: Without High Risk

eTable 4. Subgroup Analysis of Professions: High Risk

eTable 5. Subgroup Analysis of Sex: Males

eTable 6. Subgroup Analysis of Sex: Females

eTable 7. Subgroup Analysis of Age Group 18-30 years

eTable 8. Subgroup Analysis of Age Group 30-60 years

eTable 9. Subgroup Analysis of Age Group >60 years

eTable 10. Subgroup Analysis of education level: ISCED group 0-1

eTable 11. Subgroup Analysis of Education Level: ISCED 2-4

eTable 12. Subgroup Analysis of Household Size: 1-2 Members

eTable 13. Subgroup Analysis of Household Size: 3-4 Members

eTable 14. Subgroup Analysis of Household Size: >5 Members

eTable 15. Subgroup Analysis of Ethnicity: Danish

eTable 16. Subgroup Analysis of Ethnicity: Other

eTable 17. Cases infected in the household compared to negative controls

eTable 18. Main analysis adjusted for wearing a mask

eTable 19. Main analysis adjusted for handwashing

eTable 20. Main analysis adjusted for wearing a mask and handwashing

eTable 21. Symptomatic cases compared to symptomatic NC

eTable 22. Cases with unknown source of infection compared to NC and UC

**eText 1: Survey Instrument** (The original Danish questionnaire is here translated into English.)**Regarding transmission and transmission event**

This page contains questions regarding a potential transmission event. There are also questions regarding contact with people with known infection. It is important that you answer accordingly to the period prior to the date provided in the survey. Even though it can be difficult to remember past events; it is important that you answer as accurately as possible.

Regarding your test on [date], what was the primary reason that you were tested:

- I had symptoms compatible with COVID
- I had an appointment at a hospital or elsewhere where a test was required (e.g. planned surgery or dentist appointment)
- I had been in contact with a person with known infection
- Due to professional reasons, e.g. as part of routine testing or business trip
- I had planned to visit a vulnerable person (e.g. at an institution)
- I had returned from or was going abroad (except business trips)
- I wanted a test prior to participating in an event (e.g. wedding, sports event or similar)
- I suspected that I could have been infected (e.g. after participating in a large event, e.g. concert, sports event)
- I had received a notification from SmitteStop app (Danish national contact-tracing app) notifying me that I had been in contact with one or more people with known infection
- Other reason

From whom do you think you have most likely caught the infection?

- Person in my household
- Family member/close friend
- Colleague/peripheral acquaintance
- I do not know from whom I was infected

If a person was identified in the question above:

Which distance have you kept to the person in question?

- Less than 2 meters
- More than 2 meters
- Do not know

How long have you been in contact with the person in question?

- Less than 30 minutes
- More than 30 minutes
- Do not know

Which of the following are relevant for your contact? (You may choose more than one answer)

- Share bedroom
- Share bathroom/toilet
- Taken meals together
- Travelled together by car
- Been in same room and had a conversation
- Been in same room where the person in question has spoken
- Used personal protective equipment such as face mask or shield
- None of the above

When do you think you were most likely infected?

- [Provide date]

Where do you think you were most likely infected?

- At home
- During daily activities, e.g. shopping, public transport or similar
- At work
- Private event
- Leisure activity
- Public event

- Public event with singing, loud speech, yelling
- Do not know

If a place was identified in the question above:

Did the event take place indoors or outdoors?

- Predominantly indoors
- Predominantly outdoors

How many people were present at this event?

- Less than 5 people
- 5-9 people
- 10-29 people
- 30-49 people
- 50-99 people
- More than 100 people

Apart from yourself, are you aware of others having been infected at this event?

- Yes
- No
- Do not know

If yes, how many people were infected?

- [Provide number]
- Do not know

Have you experienced symptoms in relation to your COVID infection?

- Yes
- No

If yes, when did you first experience symptoms

- [provide date]

Which symptoms did you experience during the first 1-2 weeks of infection (i.e. not long-effects)? (You may choose more than one answer)

- Fever/chills
- Tiredness or exhaustion
- Headache
- Dizziness
- Runny or congested nose
- Change or loss of smell/taste
- Sore throat
- Cough
- Dyspnea at rest
- Dyspnea at activity
- Chest pain or discomfort
- Loss of appetite
- Colored mucus from cough
- Nausea/vomiting
- Constipation
- Diarrhea
- Stomachache
- Muscle or joint pain
- Prickling sensation in hands or feet
- Concentration difficulty
- Difficulty with long term memory
- Difficulty with short term memory
- Sensibility to light or sound
- Screen fatigue
- Other

When would you say, you felt well again?

- [provide date]
- I am not well yet

Have you taken any sick leave due to COVID symptoms?

- Yes, 1-2 days
- Yes, 3-5 days (up to one work week)
- Yes, 6-10 days (up to two work weeks)
- Yes, 3-4 working weeks
- Yes, more than 4 weeks
- Yes, I am still on sick leave
- No, I have not needed sick leave
- No, I am not working/on leave/retired

Have you experienced symptoms, which you suspect are long-term effects of COVID?

- Yes, I am still experiencing long-term effects
- Yes, but I am not experiencing long-term effects any longer
- No

If yes, but no longer, please provide your best estimate of when you no longer experienced symptoms.

- [provide date]

Which symptoms are you or have you experienced that you consider to be long-term effects of COVID? (You may choose more than one answer)

- Fever/chills
- Tiredness or exhaustion
- Headache
- Dizziness
- Runny or congested nose
- Change or loss of smell/taste
- Sore throat
- Cough
- Dyspnea at rest
- Dyspnea at activity
- Chest pain or discomfort
- Loss of appetite
- Colored mucus from cough
- Nausea/vomiting
- Constipation
- Diarrhea
- Stomachache
- Muscle or joint pain
- Prickling sensation in hands or feet
- Concentration difficulty
- Difficulty with long term memory
- Difficulty with short term memory
- Sensibility to light or sound
- Screen fatigue
- Other

Are you aware or do you suspect that you have infected others (you may choose more than one answer)?

- Yes, people in my household
- Yes, family members/close friends
- Yes, colleagues/peripheral acquaintances
- No, I do not think I have infected others

If yes, how many people do you think you have infected?

- [provide number]

- Do not know

Please answer the following questions in regard to the person you are most certain that you have passed the infection on to.

Which distance have you kept to the person in question?

- Less than 2 meters
- More than 2 meters
- Do not know

How long have you been in contact with the person in question?

- Less than 30 minutes
- More than 30 minutes
- Do not know

Which of the following are relevant for your contact? (You may choose more than one answer)

- Share bedroom
- Share bathroom/toilet
- Taken meals together
- Travelled together by car
- Been in same room and had a conversation
- Been in same room where the person in question has spoken
- Used personal protective equipment such as face mask or shield
- None of the above

When did you most likely pass on the infection?

- [provide date]

Under which circumstances have you most likely passed on the infection?

- At home
- During daily activities, e.g. shopping, public transport or similar
- At work
- Private event
- Leisure activity
- Public event
- Public event with singing, loud speech, yelling
- Do not know

If a place was identified in the question above:

Did the event take place indoors or outdoors?

- Predominantly indoors
- Predominantly outdoors

How many people were present at this event?

- Less than 5 people
- 5-9 people
- 10-29 people
- 30-49 people
- 50-99 people
- More than 100 people

During the 1-14 days period prior to being tested positive on the [date provided], are you aware of having been in contact with a person with known infection? (During a period where the person could have been contagious)

- Yes
- No, not to my knowledge

What is your relation to this person? (If there is more than one, please answer in relation to the closest contact)

- Person in my household
- Family member/close friend
- Colleague/peripheral acquaintance
- Other

Which distance have you kept to the person in question?

- Less than 2 meters
- More than 2 meters
- Do not know

How long have you been in contact with the person in question?

- Less than 30 minutes
- More than 30 minutes
- Do not know

Which of the following are relevant for your contact? (You may choose more than one answer)

- Share bedroom
- Share bathroom/toilet
- Taken meals together
- Travelled together by car
- Been in same room and had a conversation
- Been in same room where the person in question has spoken
- Used personal protective equipment such as face mask or shield
- None of the above

Under which circumstances have you been in contact with a person with known infection?

- At home
- During daily activities, e.g. shopping, public transport or similar
- At work
- Private event
- Leisure activity
- Public event
- Public event with singing, loud speech, yelling
- Do not know

If a place was identified in the question above:

Did the event take place indoors or outdoors?

- Predominantly indoors
- Predominantly outdoors

How many people were present at this event?

- Less than 5 people
- 5-9 people
- 10-29 people
- 30-49 people
- 50-99 people
- More than 100 people

During the 15-28 days period prior to being tested positive on the [date provided], are you aware of having been in contact with a person with known infection? (During a period where the person could have been contagious)

- Yes
- No, not to my knowledge

What is your relation to this person? (If there is more than one, please answer in relation to the closest contact)

- Person in my household
- Family member/close friend
- Colleague/peripheral acquaintance
- Other

Which distance have you kept to the person in question?

- Less than 2 meters
- More than 2 meters
- Do not know

How long have you been in contact with the person in question?

- Less than 30 minutes
- More than 30 minutes
- Do not know

Which of the following are relevant for your contact? (You may choose more than one answer)

- Share bedroom
- Share bathroom/toilet
- Taken meals together
- Travelled together by car
- Been in same room and had a conversation
- Been in same room where the person in question has spoken
- Used personal protective equipment such as face mask or shield
- None of the above

Under which circumstances have you been in contact with a person with known infection?

- At home
- During daily activities, e.g. shopping, public transport or similar
- At work
- Private event
- Leisure activity
- Public event
- Public event with singing, loud speech, yelling
- Do not know

If a place was identified in the question above:

Did the event take place indoors or outdoors?

- Predominantly indoors
- Predominantly outdoors

How many people were present at this event?

- Less than 5 people
- 5-9 people
- 10-29 people
- 30-49 people
- 50-99 people
- More than 100 people
- 

### **Regarding activities and precautions taken against COVID-19 infection**

This page contains questions regarding your activities and the precautions you have taken to avoid Coronavirus infection. It is important that you answer accordingly to the period prior to the date provided in the survey. Even though it can be difficult to remember past events; it is important that you answer as accurately as possible.

Have you in the period prior to being tested positive for Coronavirus on the [date provided] participated in any large events? (Provide one answer for each period. If you have participated in more than one event during the same period, please answer in relation to the event with the highest number of participants.

0-14 days prior to the [date provided]

- Yes, more than 30 people
- Yes, more than 50 people
- Yes, more than 100 people
- No

Was the event predominantly indoors or outdoors?

- Predominantly indoors
- Predominantly outdoors

Which type of event was it?

- Private event
- Work related event
- Leisure time event
- Public event
- Public event with singing/loud speech/yelling

15-28 days prior to the [date provided]

- Yes, more than 30 people
- Yes, more than 50 people
- Yes, more than 100 people
- No

Was the event predominantly indoors or outdoors?

- Predominantly indoors
- Predominantly outdoors

Which type of event was it?

- Private event
- Work related event
- Leisure time event
- Public event
- Public event with singing/loud speech/yelling

Which precautions have you taken against Coronavirus since March 1<sup>st</sup> 2020?

- Frequent handwashing
- Frequent use of hand sanitizer
- Cough/sneeze in sleeve
- Avoided shaking hands
- Avoided hugging/cheek kissing
- Kept 1-2 meters distance to strangers as recommended by the Danish Health Authority
- Limited use of public transport
- Stayed at home/canceled social events
- Worked more from home
- Avoided places with many people
- Avoided sport/leisure time activities with other people
- Limited travel within the country and abroad
- Changed shopping habits
- Other

Have you adhered to the public requirement of using face masks/shields?

- No
- Yes
- Yes, I use it more than what is required

During the period 0-14 days prior to being tested positive for Coronavirus on the [date provided], how often have you on average...?

- Traveled by bus
- Traveled by train/subway
- Traveled with ferry
- Traveled with plane
- Participated in indoor sports/ leisure time activities
- Participated in outdoor sports/ leisure time activities
- Been to a fitness center
- Been to a public swimming pool
- Been grocery shopping
- Dined at cafés/restaurants
- Been to a bar



During the period 15-28 days prior to being tested positive for Coronavirus on the [date provided], how often have you on average....?

- Traveled by bus
- Traveled by train/subway
- Traveled with ferry
- Traveled with plane
- Participated in indoor sports/ leisure time activities
- Participated in outdoor sports/ leisure time activities
- Been to a fitness center
- Been to a public swimming pool
- Been grocery shopping
- Dined at cafés/restaurants
- Been to a bar

During the period prior to being tested positive for Coronavirus on the [date provided] travelled abroad?

- Yes, 0-14 days prior to [test date provided]
- Yes, 15-28 days prior to [test date provided]
- No

If yes, please provide

- Date of departure
- Destination
- Duration of stay

#### **Regarding general health and working situation**

This page contains questions regarding your general health and working situation

It is important that you answer accordingly to the period prior to the date provided in the survey. Even though it can be difficult to remember past events; it is important that you answer as accurately as possible.

In general, how do you perceive your own health?

- Really good – I do not experience any limitations due to health issues in my everyday life
- Good – I only rarely experience limitations due to health issues in my everyday life
- OK – I can do most things, but I do to some extent experience limitations due to health issues in my everyday life
- Poor – I experience limitations due to health issues for the most part in my everyday life

How would you describe your physical condition?

- Really good – I exercise several times a week
- Good – I generally have a high level of physical activity
- OK – I do not exercise regularly, but I can do moderate physical activity without shortness of breath
- Not good – I experience shortness of breath if I do anything above light physical activity
- Poor – I experience shortness of breath with even slight physical activity

How tall are you (centimeters)?

How much do you weigh (kilograms)?

Do you smoke?

- No, I have never smoked
- No, not any more
- Yes, I smoke

What is your average weekly alcohol consumption?

- I never drink
- $\leq 7$  units per week
- $\leq 14$  unites per week
- $> 14$  units per week

What is your primary occupation?

- Student
- Public employee
- Private employee
- Independent business owner
- Out of the labor force
- Other

Are you primarily working?

- From home
- Your own office (including mobile offices, such as truck driver, delivery service)
- Open office
- Public space, e.g. shop, library, factory or similar
- In an institution, e.g. school, nursing home or similar
- In the health sector, e.g. general practice or hospital
- With public transport, e.g. taxi driver, bus driver, train driver or similar
- Outdoors, e.g. gardener, builder or similar
- I am out of the labor force
- Other

Does your work entail contact with customers/patients/clients or similar?

- Yes, close contact
- Yes, some contact, but not close
- No, no contact
- I am out of the labor force

During the period 0-14 days prior to being tested positive for Coronavirus on the [date provided], how many people were you typically in contact with daily, i.e. you were in the same room?

- Less than 10
- 10-29
- 30-49
- 50-69
- 70-99
- More than 100

During the period 15-28 days prior to being tested positive for Coronavirus on the [date provided], how many people were you typically in contact with daily, i.e. you were in the same room?

- Less than 10
- 10-29
- 30-49
- 50-69
- 70-99
- More than 100

This is the end of the questionnaire. If you have any questions or additional comments you may add them here. Thank you for your participation!

**eTable 1: Variables obtained from Statistics Denmark**

| Variable        | Description                                                                                                                                                                                                                                                                                                                                                                                                                                                                                                                                                                                                                                                                                                                |
|-----------------|----------------------------------------------------------------------------------------------------------------------------------------------------------------------------------------------------------------------------------------------------------------------------------------------------------------------------------------------------------------------------------------------------------------------------------------------------------------------------------------------------------------------------------------------------------------------------------------------------------------------------------------------------------------------------------------------------------------------------|
| Education level | The participants' highest achieved education level was obtained in 2020 and categorized into 4 groups in accordance with the International Standard Classification of Education (ISCED). First category refers to early childhood, primary education, and lower secondary education ISCED levels 0–2. Second category refers to general upper secondary education and vocational upper secondary education ISCED level 3. Third category refers to short-cycle tertiary, medium-length tertiary and bachelor's-level education or equivalent ISCED levels 5–6. Fourth category refers to second-cycle, master's level or the equivalent and PhD ISCED levels 7–8. In Denmark, no education is classified as ISCED level 4. |
| Income          | Participant's income was assessed in 2020 using the measurement equivalized income provided by Statistics Denmark. This income measure ensures comparability between different households as it accounts for family size. The equivalized income measure is based on the Organization for Economic Cooperation and Development modified scale, where a family's total income is weighted and redistributed equally among all family members assigning the same equivalized income to each member. The populations income was divided into quartiles. 1 <sup>st</sup> quartile contains the population with the lowest quartile of income and the 4 <sup>th</sup> with the highest income.                                  |
| Ethnicity       | Participants ethnic background was categorized into either ethnic Danes or other. In this study, ethnic Danes are defined as having at least one parent who originates from Denmark and has Danish citizenship. Other reference to participants who are either born in- or outside Denmark, but have no parents born in Denmark. The categorization was performed in accordance with Statistics Denmark's definition.                                                                                                                                                                                                                                                                                                      |
| Household size  | Household size refers to the total number of family members in a household assessed in 2020.                                                                                                                                                                                                                                                                                                                                                                                                                                                                                                                                                                                                                               |

**eTable 2. Comparison of Baseline Characteristics Between Respondents and Non-respondents**

| Characteristics         | Nonrespondents<br>(n=130,062) | Respondents<br>(n=93,121) | Total (n=223,183) |
|-------------------------|-------------------------------|---------------------------|-------------------|
| Age, median [IQR]       | 33 [25, 48]                   | 45 [30, 56]               | 38 [27, 52]       |
| Missing                 | 739                           | 172                       | 911               |
| Sex, No. (%)            |                               |                           |                   |
| Female                  | 59,914 (46.3)                 | 53,742 (57.8)             | 113,656 (51.1)    |
| Male                    | 69,409 (53.7)                 | 39,207 (42.2)             | 108,616 (48.9)    |
| Missing                 | 739                           | 172                       | 911               |
| Ethnicity, No. (%)      |                               |                           |                   |
| Danish                  | 101,653 (78.2)                | 84,818 (91.1)             | 186,471 (83.6)    |
| Other                   | 28,409 (21.8)                 | 8,303 (8.9)               | 36,712 (16.4)     |
| Household size, No. (%) |                               |                           |                   |
| 1 to 2 persons          | 75,309 (59.4)                 | 54,939 (59.8)             | 130,248 (59.6)    |
| 3 to 4 persons          | 41,457 (32.7)                 | 31,474 (34.3)             | 72,931 (33.4)     |
| ≥ 5 persons             | 9,916 (7.8)                   | 5,434 (5.9)               | 15,350 (7.0)      |
| Missing                 | 3,380                         | 1,274                     | 4,654             |

**eTable 3. Subgroup Analysis of Professions (Without High Risk)**

| Questions                            | Options                    | Cases compared to negative controls |         | Cases compared to untested controls |         |
|--------------------------------------|----------------------------|-------------------------------------|---------|-------------------------------------|---------|
|                                      |                            | Rate Ratio [CI]                     | P-value | Rate Ratio [CI]                     | P-value |
| Contact w/ SARS-Cov-2 positive       | None                       | Ref                                 | Ref     | Ref                                 | Ref     |
|                                      | Other                      | 1.64 [1.51;1.79]                    | <0.001  | 12.22 [10.85;13.75]                 | <0.001  |
| Daily contacts                       | Close (<2 meter, >30 min.) | 2.98 [2.77;3.21]                    | <0.001  | 32.12 [28.25;36.51]                 | <0.001  |
|                                      | <10                        | Ref                                 | Ref     | Ref                                 | Ref     |
|                                      | 10 to 50                   | 1.04 [0.97;1.12]                    | 0.276   | 1.42 [1.31;1.53]                    | <0.001  |
|                                      | >50                        | 1.20 [1.01;1.41]                    | 0.035   | 1.18 [1.00;1.39]                    | 0.048   |
| Bus travel                           | No                         | Ref                                 | Ref     | Ref                                 | Ref     |
|                                      | Yes                        | 0.81 [0.75;0.88]                    | <0.001  | 0.83 [0.77;0.90]                    | <0.001  |
| Train travel                         | No                         | Ref                                 | Ref     | Ref                                 | Ref     |
|                                      | Yes                        | 0.85 [0.79;0.91]                    | <0.001  | 0.98 [0.92;1.05]                    | 0.66    |
| Ferry travel                         | No                         | Ref                                 | Ref     | Ref                                 | Ref     |
|                                      | Yes                        | 0.76 [0.65;0.89]                    | <0.001  | 0.84 [0.72;0.99]                    | 0.032   |
| Airplane travel                      | No                         | Ref                                 | Ref     | Ref                                 | Ref     |
|                                      | Yes                        | 0.68 [0.55;0.85]                    | <0.001  | 1.38 [1.09;1.76]                    | 0.0083  |
| Indoor sports                        | No                         | Ref                                 | Ref     | Ref                                 | Ref     |
|                                      | Yes                        | 1.16 [1.08;1.25]                    | <0.001  | 1.60 [1.48;1.73]                    | <0.001  |
| Outdoor sports                       | No                         | Ref                                 | Ref     | Ref                                 | Ref     |
|                                      | Yes                        | 0.79 [0.72;0.87]                    | <0.001  | 1.03 [0.94;1.14]                    | 0.52    |
| Visiting a gym                       | No                         | Ref                                 | Ref     | Ref                                 | Ref     |
|                                      | Yes                        | 1.29 [1.20;1.39]                    | <0.001  | 1.64 [1.52;1.77]                    | <0.001  |
| Use of public swimming pool or sauna | No                         | Ref                                 | Ref     | Ref                                 | Ref     |
|                                      | Yes                        | 0.88 [0.78;1.00]                    | 0.045   | 1.12 [0.99;1.27]                    | 0.08    |
| Grocery shopping                     | No                         | Ref                                 | Ref     | Ref                                 | Ref     |
|                                      | Yes                        | 0.47 [0.41;0.54]                    | <0.001  | 0.59 [0.51;0.68]                    | <0.001  |
| Restaurants/cafés                    | No                         | Ref                                 | Ref     | Ref                                 | Ref     |
|                                      | Yes                        | 1.11 [1.04;1.19]                    | 0.0014  | 1.55 [1.45;1.66]                    | <0.001  |
| Bar                                  | No                         | Ref                                 | Ref     | Ref                                 | Ref     |
|                                      | Yes                        | 1.39 [1.28;1.50]                    | <0.001  | 1.84 [1.69;2.00]                    | <0.001  |
| Wearing a mask                       | No                         | Ref                                 | Ref     | Ref                                 | Ref     |
|                                      | Yes                        | 1.13 [0.77;1.65]                    | 0.54    | 1.75 [1.19;2.57]                    | 0.0043  |
| Frequent handwashing                 | No                         | Ref                                 | Ref     | Ref                                 | Ref     |
|                                      | Yes                        | 0.98 [0.91;1.05]                    | 0.52    | 1.05 [0.97;1.13]                    | 0.21    |
| Frequent hand sanitizer use          | No                         | Ref                                 | Ref     | Ref                                 | Ref     |
|                                      | Yes                        | 0.73 [0.67;0.79]                    | <0.001  | 0.77 [0.71;0.84]                    | <0.001  |
| Sneezing in elbow                    | No                         | Ref                                 | Ref     | Ref                                 | Ref     |
|                                      | Yes                        | 0.90 [0.84;0.97]                    | 0.0039  | 0.98 [0.91;1.05]                    | 0.55    |
| Avoiding handshakes                  | No                         | Ref                                 | Ref     | Ref                                 | Ref     |
|                                      | Yes                        | 0.68 [0.63;0.74]                    | <0.001  | 0.62 [0.58;0.67]                    | <0.001  |
| Avoiding hugs                        | No                         | Ref                                 | Ref     | Ref                                 | Ref     |
|                                      | Yes                        | 0.81 [0.76;0.87]                    | <0.001  | 0.80 [0.75;0.86]                    | <0.001  |
| Physical distancing                  | No                         | Ref                                 | Ref     | Ref                                 | Ref     |
|                                      | Yes                        | 0.74 [0.69;0.79]                    | <0.001  | 0.69 [0.64;0.74]                    | <0.001  |
| Limiting public transport            | No                         | Ref                                 | Ref     | Ref                                 | Ref     |
|                                      | Yes                        | 0.92 [0.87;0.98]                    | 0.0084  | 0.89 [0.84;0.95]                    | <0.001  |
| Avoiding social events               | No                         | Ref                                 | Ref     | Ref                                 | Ref     |
|                                      | Yes                        | 0.77 [0.73;0.82]                    | <0.001  | 0.74 [0.70;0.79]                    | <0.001  |
| Staying more at home                 | No                         | Ref                                 | Ref     | Ref                                 | Ref     |
|                                      | Yes                        | 0.74 [0.69;0.78]                    | <0.001  | 0.86 [0.81;0.92]                    | <0.001  |

**eTable 3. Subgroup Analysis of Professions (Without High Risk) (continued)**

| Questions                   | Options        | Cases compared to negative controls |         | Cases compared to untested controls |         |
|-----------------------------|----------------|-------------------------------------|---------|-------------------------------------|---------|
|                             |                | Rate Ratio [CI]                     | P-value | Rate Ratio [CI]                     | P-value |
| Avoiding crowds             | No             | Ref                                 | Ref     | Ref                                 | Ref     |
|                             | Yes            | 0.82 [0.77;0.87]                    | <0.001  | 0.80 [0.76;0.85]                    | <0.001  |
| Avoiding sports with others | No             | Ref                                 | Ref     | Ref                                 | Ref     |
|                             | Yes            | 0.84 [0.80;0.89]                    | <0.001  | 0.73 [0.69;0.78]                    | <0.001  |
| Limiting traveling          | No             | Ref                                 | Ref     | Ref                                 | Ref     |
|                             | Yes            | 0.89 [0.83;0.95]                    | <0.001  | 0.77 [0.72;0.82]                    | <0.001  |
| Limiting grocery shopping   | No             | Ref                                 | Ref     | Ref                                 | Ref     |
|                             | Yes            | 0.99 [0.93;1.05]                    | 0.71    | 0.95 [0.89;1.01]                    | 0.096   |
| Attending large event       | No             | Ref                                 | Ref     | Ref                                 | Ref     |
|                             | Yes, >30       | 1.58 [1.39;1.79]                    | <0.001  | 2.42 [2.10;2.78]                    | <0.001  |
|                             | Yes, >50       | 1.88 [1.66;2.13]                    | <0.001  | 2.41 [2.11;2.76]                    | <0.001  |
| Indoor/outdoor event        | No             | Ref                                 | Ref     | Ref                                 | Ref     |
|                             | Indoor         | 1.75 [1.59;1.92]                    | <0.001  | 2.58 [2.33;2.87]                    | <0.001  |
|                             | Outdoor        | 1.41 [1.05;1.90]                    | 0.023   | 1.42 [1.05;1.91]                    | 0.021   |
| Contact to people at work   | No contact     | Ref                                 | Ref     | Ref                                 | Ref     |
|                             | Yes, close     | 1.25 [1.11;1.40]                    | <0.001  | 1.55 [1.38;1.75]                    | <0.001  |
|                             | Yes, other     | 1.10 [1.03;1.19]                    | 0.0073  | 1.17 [1.09;1.26]                    | <0.001  |
|                             | Non-employed   | 0.91 [0.81;1.01]                    | 0.0798  | 0.61 [0.55;0.68]                    | <0.001  |
| Household size              | 1 to 2 persons | Ref                                 | Ref     | Ref                                 | Ref     |
|                             | 3 to 4 persons | 0.92 [0.85;0.99]                    | 0.022   | 1.27 [1.17;1.37]                    | <0.001  |
|                             | >5 persons     | 1.12 [0.98;1.28]                    | 0.09    | 1.88 [1.64;2.16]                    | <0.001  |
| Education level             | ISCED 0        | Ref                                 | Ref     | Ref                                 | Ref     |
|                             | ISCED 1        | 1.00 [0.90;1.11]                    | 0.9886  | 1.23 [1.10;1.37]                    | <0.001  |
|                             | ISCED 2        | 1.01 [0.90;1.13]                    | 0.9273  | 1.42 [1.27;1.59]                    | <0.001  |
|                             | ISCED 3&4      | 0.84 [0.74;0.94]                    | 0.0039  | 1.25 [1.11;1.41]                    | <0.001  |
| Income                      | 1st quartile   | Ref                                 | Ref     | Ref                                 | Ref     |
|                             | 2nd quartile   | 0.83 [0.76;0.91]                    | <0.001  | 0.94 [0.86;1.03]                    | 0.18    |
|                             | 3rd quartile   | 0.85 [0.78;0.93]                    | <0.001  | 1.05 [0.96;1.15]                    | 0.26    |
|                             | 4th quartile   | 0.82 [0.75;0.90]                    | <0.001  | 1.05 [0.96;1.15]                    | 0.31    |
| Contact to people at work   | Danish         | Ref                                 | Ref     | Ref                                 | Ref     |
|                             | Other          | 1.39 [1.28;1.52]                    | <0.001  | 3.25 [2.95;3.59]                    | <0.001  |

**eTable 4. Subgroup Analysis of Professions (High Risk)**

| Questions                            | Options                    | Cases compared to negative controls |         | Cases compared to untested controls |         |
|--------------------------------------|----------------------------|-------------------------------------|---------|-------------------------------------|---------|
|                                      |                            | Rate Ratio [CI]                     | P-value | Rate Ratio [CI]                     | P-value |
| Contact w/ SARS-Cov-2 positive       | None                       | Ref                                 | Ref     | Ref                                 | Ref     |
|                                      | Other                      | 2.03 [1.78;2.32]                    | <0.001  | 8.77 [6.91;11.13]                   | <0.001  |
| Daily contacts                       | Close (<2 meter, >30 min.) | 2.96 [2.59;3.40]                    | <0.001  | 26.46 [18.80;37.23]                 | <0.001  |
|                                      | <10                        | Ref                                 | Ref     | Ref                                 | Ref     |
|                                      | 10 to 50                   | 0.92 [0.82;1.04]                    | 0.17    | 1.00 [0.85;1.17]                    | 0.96    |
| Bus travel                           | >50                        | 1.15 [0.94;1.41]                    | 0.17    | 1.19 [0.90;1.56]                    | 0.21    |
|                                      | No                         | Ref                                 | Ref     | Ref                                 | Ref     |
| Train travel                         | Yes                        | 0.83 [0.73;0.95]                    | 0.0045  | 0.75 [0.64;0.88]                    | <0.001  |
|                                      | No                         | Ref                                 | Ref     | Ref                                 | Ref     |
| Ferry travel                         | Yes                        | 0.87 [0.77;0.98]                    | 0.023   | 0.85 [0.73;0.99]                    | 0.04    |
|                                      | No                         | Ref                                 | Ref     | Ref                                 | Ref     |
| Airplane travel                      | Yes                        | 0.83 [0.61;1.12]                    | 0.23    | 0.93 [0.63;1.37]                    | 0.71    |
|                                      | No                         | Ref                                 | Ref     | Ref                                 | Ref     |
| Indoor sports                        | Yes                        | 0.71 [0.41;1.24]                    | 0.23    | 0.92 [0.45;1.88]                    | 0.83    |
|                                      | No                         | Ref                                 | Ref     | Ref                                 | Ref     |
| Outdoor sports                       | Yes                        | 1.21 [1.05;1.39]                    | 0.0079  | 1.35 [1.11;1.63]                    | 0.0021  |
|                                      | No                         | Ref                                 | Ref     | Ref                                 | Ref     |
| Visiting a gym                       | Yes                        | 0.64 [0.53;0.78]                    | <0.001  | 0.76 [0.59;0.98]                    | 0.035   |
|                                      | No                         | Ref                                 | Ref     | Ref                                 | Ref     |
| Use of public swimming pool or sauna | Yes                        | 1.23 [1.08;1.41]                    | 0.0027  | 1.24 [1.04;1.49]                    | 0.019   |
|                                      | No                         | Ref                                 | Ref     | Ref                                 | Ref     |
| Grocery shopping                     | Yes                        | 0.84 [0.67;1.04]                    | 0.11    | 0.86 [0.65;1.13]                    | 0.27    |
|                                      | No                         | Ref                                 | Ref     | Ref                                 | Ref     |
| Restaurants/cafés                    | Yes                        | 0.68 [0.50;0.92]                    | 0.013   | 0.58 [0.37;0.89]                    | 0.013   |
|                                      | No                         | Ref                                 | Ref     | Ref                                 | Ref     |
| Bar                                  | Yes                        | 1.05 [0.94;1.18]                    | 0.38    | 1.08 [0.92;1.25]                    | 0.34    |
|                                      | No                         | Ref                                 | Ref     | Ref                                 | Ref     |
| Wearing a mask                       | Yes                        | 1.11 [0.94;1.31]                    | 0.22    | 1.33 [1.07;1.66]                    | 0.0097  |
|                                      | No                         | Ref                                 | Ref     | Ref                                 | Ref     |
| Frequent handwashing                 | Yes                        | 1.32 [0.65;2.68]                    | 0.44    | 1.25 [0.55;2.82]                    | 0.59    |
|                                      | No                         | Ref                                 | Ref     | Ref                                 | Ref     |
| Frequent hand sanitizer use          | Yes                        | 2.05 [1.62;2.61]                    | <0.001  | 2.62 [1.95;3.52]                    | <0.001  |
|                                      | No                         | Ref                                 | Ref     | Ref                                 | Ref     |
| Sneezing in elbow                    | Yes                        | 2.14 [1.36;3.36]                    | 0.001   | 3.92 [2.33;6.59]                    | <0.001  |
|                                      | No                         | Ref                                 | Ref     | Ref                                 | Ref     |
| Avoiding handshakes                  | Yes                        | 2.19 [1.69;2.83]                    | <0.001  | 2.73 [2.00;3.74]                    | <0.001  |
|                                      | No                         | Ref                                 | Ref     | Ref                                 | Ref     |
| Avoiding hugs                        | Yes                        | 1.22 [0.95;1.56]                    | 0.12    | 1.44 [1.06;1.96]                    | 0.018   |
|                                      | No                         | Ref                                 | Ref     | Ref                                 | Ref     |
| Physical distancing                  | Yes                        | 1.17 [1.00;1.35]                    | 0.043   | 1.41 [1.16;1.70]                    | <0.001  |
|                                      | No                         | Ref                                 | Ref     | Ref                                 | Ref     |
| Limiting public transport            | Yes                        | 1.04 [0.86;1.27]                    | 0.68    | 1.60 [1.25;2.05]                    | <0.001  |
|                                      | No                         | Ref                                 | Ref     | Ref                                 | Ref     |
| Avoiding social events               | Yes                        | 1.38 [1.23;1.56]                    | <0.001  | 1.63 [1.39;1.90]                    | <0.001  |
|                                      | No                         | Ref                                 | Ref     | Ref                                 | Ref     |
| Staying more at home                 | Yes                        | 1.23 [1.08;1.39]                    | 0.002   | 1.37 [1.16;1.62]                    | <0.001  |
|                                      | No                         | Ref                                 | Ref     | Ref                                 | Ref     |
|                                      | Yes                        | 0.87 [0.76;0.99]                    | 0.042   | 0.67 [0.56;0.79]                    | <0.001  |

**eTable 4. Subgroup Analysis of Professions (High Risk) (continued)**

| Questions                   | Options        | Cases compared to negative controls |         | Cases compared to untested controls |         |
|-----------------------------|----------------|-------------------------------------|---------|-------------------------------------|---------|
|                             |                | Rate Ratio [CI]                     | P-value | Rate Ratio [CI]                     | P-value |
| Avoiding crowds             | No             | Ref                                 | Ref     | Ref                                 | Ref     |
|                             | Yes            | 1.18 [1.05;1.34]                    | 0.006   | 1.43 [1.22;1.67]                    | <0.001  |
| Avoiding sports with others | No             | Ref                                 | Ref     | Ref                                 | Ref     |
|                             | Yes            | 1.09 [0.98;1.21]                    | 0.13    | 1.04 [0.90;1.20]                    | 0.58    |
| Limiting traveling          | No             | Ref                                 | Ref     | Ref                                 | Ref     |
|                             | Yes            | 1.43 [1.23;1.66]                    | <0.001  | 1.29 [1.05;1.58]                    | 0.015   |
| Limiting grocery shopping   | No             | Ref                                 | Ref     | Ref                                 | Ref     |
|                             | Yes            | 1.36 [1.21;1.51]                    | <0.001  | 1.46 [1.26;1.69]                    | <0.001  |
| Attending large event       | No             | Ref                                 | Ref     | Ref                                 | Ref     |
|                             | Yes, >30       | 1.18 [0.95;1.47]                    | 0.1319  | 1.28 [0.96;1.71]                    | 0.093   |
|                             | Yes, >50       | 1.40 [1.09;1.81]                    | 0.0089  | 1.49 [1.07;2.08]                    | 0.018   |
| Indoor/outdoor event        | No             | Ref                                 | Ref     | Ref                                 | Ref     |
|                             | Indoor         | 1.32 [1.10;1.57]                    | 0.0022  | 1.45 [1.15;1.83]                    | 0.0019  |
|                             | Outdoor        | 0.84 [0.46;1.55]                    | 0.5808  | 0.80 [0.37;1.70]                    | 0.5535  |
| Contact to people at work   | No contact     | Ref                                 | Ref     | Ref                                 | Ref     |
|                             | Yes, close     | 1.04 [0.80;1.35]                    | 0.76    | 1.51 [1.11;2.06]                    | 0.0086  |
|                             | Yes, other     | 1.00 [0.76;1.33]                    | 0.97    | 1.14 [0.82;1.58]                    | 0.4466  |
|                             | Non-employed   | 0.80 [0.42;1.52]                    | 0.5     | 0.46 [0.21;1.01]                    | 0.0534  |
| Household size              | 1 to 2 persons | Ref                                 | Ref     | Ref                                 | Ref     |
|                             | 3 to 4 persons | 0.99 [0.87;1.13]                    | 0.91    | 1.09 [0.92;1.30]                    | 0.32    |
|                             | >5 persons     | 1.17 [0.93;1.48]                    | 0.19    | 1.28 [0.94;1.75]                    | 0.12    |
| Education level             | ISCED 0        | Ref                                 | Ref     | Ref                                 | Ref     |
|                             | ISCED 1        | 1.01 [0.79;1.29]                    | 0.92    | 1.69 [1.24;2.29]                    | <0.001  |
|                             | ISCED 2        | 1.16 [0.91;1.48]                    | 0.23    | 1.36 [1.00;1.84]                    | 0.047   |
|                             | ISCED 3&4      | 1.06 [0.80;1.39]                    | 0.69    | 1.32 [0.93;1.87]                    | 0.115   |
| Income                      | 1st quartile   | Ref                                 | Ref     | Ref                                 | Ref     |
|                             | 2nd quartile   | 1.01 [0.86;1.18]                    | 0.93    | 1.01 [0.82;1.24]                    | 0.93    |
|                             | 3rd quartile   | 1.06 [0.90;1.25]                    | 0.49    | 1.00 [0.79;1.25]                    | 0.97    |
| Contact to people at work   | 4th quartile   | 1.07 [0.89;1.30]                    | 0.47    | 0.94 [0.73;1.21]                    | 0.62    |
|                             | Danish         | Ref                                 | Ref     | Ref                                 | Ref     |
|                             | Other          | 1.20 [1.01;1.41]                    | 0.036   | 2.07 [1.60;2.67]                    | <0.001  |



**eTable 5. Subgroup Analysis of Sex: Males**

| Questions                      | Options                    | Cases compared to negative controls |         | Cases compared to untested controls |         |
|--------------------------------|----------------------------|-------------------------------------|---------|-------------------------------------|---------|
|                                |                            | Rate Ratio [CI]                     | P-value | Questions                           | P-value |
| Contact w/ SARS-Cov-2 positive | None                       | Ref                                 | Ref     | Ref                                 | Ref     |
|                                | Other                      | 1.56 [1.41;1.73]                    | <0.001  | 10.78 [9.25;12.57]                  | <0.001  |
|                                | Close (<2 meter, >30 min.) | 2.77 [2.51;3.05]                    | <0.001  | 29.31 [24.47;35.10]                 | <0.001  |
| Daily contacts                 | <10                        | Ref                                 | Ref     | Ref                                 | Ref     |
|                                | 10 to 50                   | 1.04 [0.95;1.13]                    | 0.392   | 1.68 [1.53;1.85]                    | <0.001  |
|                                | >50                        | 1.22 [1.02;1.46]                    | 0.027   | 1.59 [1.31;1.92]                    | <0.001  |
| Bus travel                     | No                         | Ref                                 | Ref     | Ref                                 | Ref     |
|                                | Yes                        | 0.87 [0.79;0.96]                    | 0.0062  | 0.93 [0.83;1.03]                    | 0.15    |
| Train travel                   | No                         | Ref                                 | Ref     | Ref                                 | Ref     |
|                                | Yes                        | 0.82 [0.75;0.89]                    | <0.001  | 0.98 [0.89;1.08]                    | 0.69    |
| Ferry travel                   | No                         | Ref                                 | Ref     | Ref                                 | Ref     |
|                                | Yes                        | 0.78 [0.64;0.93]                    | 0.0077  | 0.95 [0.78;1.15]                    | 0.59    |
| Airplane travel                | No                         | Ref                                 | Ref     | Ref                                 | Ref     |
|                                | Yes                        | 0.75 [0.58;0.97]                    | 0.029   | 1.41 [1.04;1.90]                    | 0.027   |
| Indoor sports                  | No                         | Ref                                 | Ref     | Ref                                 | Ref     |
|                                | Yes                        | 1.16 [1.05;1.27]                    | 0.003   | 1.60 [1.44;1.78]                    | <0.001  |
| Outdoor sports                 | No                         | Ref                                 | Ref     | Ref                                 | Ref     |
|                                | Yes                        | 0.79 [0.71;0.89]                    | <0.001  | 1.08 [0.96;1.22]                    | 0.21    |
| Visiting a gym                 | No                         | Ref                                 | Ref     | Ref                                 | Ref     |
|                                | Yes                        | 1.36 [1.23;1.50]                    | <0.001  | 1.76 [1.58;1.95]                    | <0.001  |
| Use of public swimming pool    | No                         | Ref                                 | Ref     | Ref                                 | Ref     |
|                                | Yes                        | 0.93 [0.79;1.08]                    | 0.34    | 1.19 [1.00;1.40]                    | 0.045   |
| Grocery shopping               | No                         | Ref                                 | Ref     | Ref                                 | Ref     |
|                                | Yes                        | 0.52 [0.43;0.62]                    | <0.001  | 0.62 [0.51;0.74]                    | <0.001  |
| Restaurants/cafés              | No                         | Ref                                 | Ref     | Ref                                 | Ref     |
|                                | Yes                        | 1.03 [0.95;1.12]                    | 0.45    | 1.47 [1.34;1.60]                    | <0.001  |
| Bar                            | No                         | Ref                                 | Ref     | Ref                                 | Ref     |
|                                | Yes                        | 1.29 [1.17;1.43]                    | <0.001  | 1.72 [1.54;1.92]                    | <0.001  |
| Wearing a mask                 | No                         | Ref                                 | Ref     | Ref                                 | Ref     |
|                                | Yes                        | 1.01 [0.64;1.59]                    | 0.96    | 1.81 [1.13;2.88]                    | 0.013   |
| Frequent handwashing           | No                         | Ref                                 | Ref     | Ref                                 | Ref     |
|                                | Yes                        | 1.08 [0.98;1.19]                    | 0.15    | 1.32 [1.20;1.47]                    | <0.001  |
| Frequent hand sanitizer use    | No                         | Ref                                 | Ref     | Ref                                 | Ref     |
|                                | Yes                        | 0.78 [0.70;0.87]                    | <0.001  | 1.01 [0.90;1.13]                    | 0.83    |
| Sneezing in elbow              | No                         | Ref                                 | Ref     | Ref                                 | Ref     |
|                                | Yes                        | 0.97 [0.89;1.07]                    | 0.6     | 1.27 [1.15;1.40]                    | <0.001  |
| Avoiding handshakes            | No                         | Ref                                 | Ref     | Ref                                 | Ref     |
|                                | Yes                        | 0.76 [0.69;0.84]                    | <0.001  | 0.79 [0.71;0.88]                    | <0.001  |
| Avoiding hugs                  | No                         | Ref                                 | Ref     | Ref                                 | Ref     |
|                                | Yes                        | 0.88 [0.80;0.96]                    | 0.0037  | 0.92 [0.84;1.01]                    | 0.098   |
| Physical distancing            | No                         | Ref                                 | Ref     | Ref                                 | Ref     |
|                                | Yes                        | 0.80 [0.73;0.88]                    | <0.001  | 0.86 [0.77;0.95]                    | 0.0026  |
| Limiting public transport      | No                         | Ref                                 | Ref     | Ref                                 | Ref     |
|                                | Yes                        | 0.95 [0.88;1.03]                    | 0.22    | 0.98 [0.91;1.07]                    | 0.71    |
| Avoiding social events         | No                         | Ref                                 | Ref     | Ref                                 | Ref     |
|                                | Yes                        | 0.80 [0.74;0.87]                    | <0.001  | 0.86 [0.79;0.93]                    | <0.001  |
| Staying more at home           | No                         | Ref                                 | Ref     | Ref                                 | Ref     |
|                                | Yes                        | 0.73 [0.67;0.79]                    | <0.001  | 0.81 [0.75;0.88]                    | <0.001  |

**eTable 5. Subgroup Analysis of Sex: Males (continued)**

| Questions                   | Options                           | Cases compared to negative controls |         | Cases compared to untested controls |         |
|-----------------------------|-----------------------------------|-------------------------------------|---------|-------------------------------------|---------|
|                             |                                   | Rate Ratio [CI]                     | P-value | Questions                           | P-value |
| Avoiding crowds             | No                                | Ref                                 | Ref     | Ref                                 | Ref     |
|                             | Yes                               | 0.86 [0.79;0.93]                    | <0.001  | 0.90 [0.83;0.97]                    | 0.0098  |
| Avoiding sports with others | No                                | Ref                                 | Ref     | Ref                                 | Ref     |
|                             | Yes                               | 0.83 [0.77;0.89]                    | <0.001  | 0.76 [0.70;0.82]                    | <0.001  |
| Limiting traveling          | No                                | Ref                                 | Ref     | Ref                                 | Ref     |
|                             | Yes                               | 0.93 [0.86;1.01]                    | 0.08    | 0.88 [0.81;0.96]                    | 0.0036  |
| Limiting grocery shopping   | No                                | Ref                                 | Ref     | Ref                                 | Ref     |
|                             | Yes                               | 1.02 [0.94;1.10]                    | 0.67    | 1.02 [0.94;1.11]                    | 0.65    |
| Attending large events      | No                                | Ref                                 | Ref     | Ref                                 | Ref     |
|                             | Yes, >30                          | 1.35 [1.15;1.58]                    | <0.001  | 2.01 [1.68;2.41]                    | <0.001  |
|                             | Yes, >50                          | 1.63 [1.39;1.92]                    | <0.001  | 2.06 [1.72;2.48]                    | <0.001  |
| Indoor/outdoor events       | No                                | Ref                                 | Ref     | Ref                                 | Ref     |
|                             | Indoor                            | 1.50 [1.33;1.70]                    | <0.001  | 2.15 [1.87;2.48]                    | <0.001  |
|                             | Outdoor                           | 1.29 [0.93;1.78]                    | 0.13    | 1.50 [1.06;2.11]                    | 0.021   |
| Primary employment          | Non-employed                      | Ref                                 | Ref     | Ref                                 | Ref     |
|                             | Student                           | 1.21 [0.95;1.53]                    | 0.1158  | 2.75 [2.16;3.51]                    | <0.001  |
|                             | Public employee                   | 1.35 [1.12;1.64]                    | 0.0018  | 4.18 [3.44;5.08]                    | <0.001  |
|                             | Private employee                  | 1.28 [1.07;1.54]                    | 0.0077  | 2.30 [1.91;2.76]                    | <0.001  |
|                             | Self-employed                     | 1.31 [1.06;1.62]                    | 0.0129  | 2.09 [1.69;2.60]                    | <0.001  |
|                             | Other                             | 1.27 [0.97;1.65]                    | 0.0824  | 1.47 [1.12;1.93]                    | 0.0054  |
| Type of occupation          | Non-employed                      | Ref                                 | Ref     | Ref                                 | Ref     |
|                             | At home                           | 0.84 [0.71;1.01]                    | 0.0637  | 1.41 [1.18; 1.69]                   | <0.001  |
|                             | Own office                        | 1.22 [1.00;1.49]                    | 0.0467  | 2.43 [1.98; 2.98]                   | <0.001  |
|                             | Shared office                     | 1.25 [1.04;1.49]                    | 0.0181  | 2.46 [2.04; 2.96]                   | <0.001  |
|                             | Retail, library or factory worker | 1.39 [1.12;1.73]                    | 0.003   | 1.91 [1.54; 2.38]                   | <0.001  |
|                             | Social care or education          | 1.33 [1.09;1.62]                    | 0.0042  | 5.85 [4.72; 7.25]                   | <0.001  |
|                             | Healthcare sector                 | 1.26 [0.99;1.59]                    | 0.0561  | 7.68 [5.76;10.23]                   | <0.001  |
|                             | Transport (e.g. bus/taxi-driver)  | 1.31 [0.91;1.87]                    | 0.1482  | 2.05 [1.40; 2.99]                   | <0.001  |
|                             | Outdoors (e.g. gardener)          | 1.18 [0.93;1.50]                    | 0.1843  | 1.37 [1.08; 1.74]                   | 0.011   |
|                             | Other                             | 1.22 [0.99;1.50]                    | 0.0609  | 2.03 [1.65; 2.51]                   | <0.001  |
| Contact to people at work   | No contact                        | Ref                                 | Ref     | Ref                                 | Ref     |
|                             | Yes, close                        | 1.18 [1.05;1.33]                    | 0.0043  | 2.28 [2.00;2.60]                    | <0.001  |
|                             | Yes, other                        | 1.10 [1.00;1.21]                    | 0.0433  | 1.15 [1.04;1.27]                    | 0.005   |
| Household size              | Non-employed                      | 0.97 [0.82;1.14]                    | 0.6912  | 0.57 [0.48;0.67]                    | <0.001  |
|                             | 1 to 2 persons                    | Ref                                 | Ref     | Ref                                 | Ref     |
|                             | 3 to 4 persons                    | 0.88 [0.80;0.97]                    | 0.0073  | 1.32 [1.20;1.46]                    | <0.001  |
| Education level             | >5 persons                        | 1.12 [0.95;1.33]                    | 0.1667  | 1.99 [1.66;2.38]                    | <0.001  |
|                             | ISCED 0                           | Ref                                 | Ref     | Ref                                 | Ref     |
|                             | ISCED 1                           | 1.03 [0.89;1.18]                    | 0.726   | 1.29 [1.12;1.49]                    | <0.001  |
|                             | ISCED 2                           | 1.06 [0.91;1.23]                    | 0.453   | 1.63 [1.40;1.90]                    | <0.001  |
| Income                      | ISCED 3&4                         | 0.87 [0.75;1.02]                    | 0.085   | 1.44 [1.23;1.69]                    | <0.001  |
|                             | 1st quartile                      | Ref                                 | Ref     | Ref                                 | Ref     |
|                             | 2nd quartile                      | 0.87 [0.77;0.98]                    | 0.018   | 1.16 [1.03;1.31]                    | 0.0131  |
|                             | 3rd quartile                      | 0.89 [0.79;1.00]                    | 0.042   | 1.21 [1.07;1.37]                    | 0.0018  |
| Ethnicity                   | 4th quartile                      | 0.86 [0.76;0.97]                    | 0.013   | 1.16 [1.02;1.31]                    | 0.0198  |
|                             | Danish                            | Ref                                 | Ref     | Ref                                 | Ref     |

|  |       |                  |        |                  |        |
|--|-------|------------------|--------|------------------|--------|
|  | Other | 1.37 [1.23;1.53] | <0.001 | 3.42 [2.98;3.93] | <0.001 |
|--|-------|------------------|--------|------------------|--------|

**eTable 6. Subgroup Analysis of Sex: Females**

| Questions                            | Options                    | Cases compared to negative controls |         | Cases compared to untested controls |         |
|--------------------------------------|----------------------------|-------------------------------------|---------|-------------------------------------|---------|
|                                      |                            | Rate Ratio [CI]                     | P-value | Questions                           | P-value |
| Contact w/ SARS-Cov-2 positive       | None                       | Ref                                 | Ref     | Ref                                 | Ref     |
|                                      | Other                      | 1.90 [1.74;2.07]                    | <0.001  | 15.53 [13.66;17.66]                 | <0.001  |
|                                      | Close (<2 meter, >30 min.) | 3.15 [2.90;3.42]                    | <0.001  | 35.10 [30.40;40.51]                 | <0.001  |
| Daily contacts                       | <10                        | Ref                                 | Ref     | Ref                                 | Ref     |
|                                      | 10 to 50                   | 1.06 [0.99;1.15]                    | 0.09    | 1.94 [1.80;2.10]                    | <0.001  |
|                                      | >50                        | 1.25 [1.07;1.46]                    | 0.0045  | 1.88 [1.59;2.21]                    | <0.001  |
| Bus travel                           | No                         | Ref                                 | Ref     | Ref                                 | Ref     |
|                                      | Yes                        | 0.80 [0.74;0.87]                    | <0.001  | 0.83 [0.76;0.90]                    | <0.001  |
| Train travel                         | No                         | Ref                                 | Ref     | Ref                                 | Ref     |
|                                      | Yes                        | 0.89 [0.82;0.96]                    | 0.0017  | 0.97 [0.90;1.04]                    | 0.4     |
| Ferry travel                         | No                         | Ref                                 | Ref     | Ref                                 | Ref     |
|                                      | Yes                        | 0.77 [0.63;0.93]                    | 0.0066  | 0.73 [0.60;0.89]                    | 0.0018  |
| Airplane travel                      | No                         | Ref                                 | Ref     | Ref                                 | Ref     |
|                                      | Yes                        | 0.64 [0.48;0.86]                    | 0.0035  | 1.08 [0.78;1.48]                    | 0.65    |
| Indoor sports                        | No                         | Ref                                 | Ref     | Ref                                 | Ref     |
|                                      | Yes                        | 1.16 [1.06;1.26]                    | <0.001  | 1.48 [1.35;1.61]                    | <0.001  |
| Outdoor sports                       | No                         | Ref                                 | Ref     | Ref                                 | Ref     |
|                                      | Yes                        | 0.71 [0.63;0.81]                    | <0.001  | 0.85 [0.75;0.96]                    | 0.0089  |
| Visiting a gym                       | No                         | Ref                                 | Ref     | Ref                                 | Ref     |
|                                      | Yes                        | 1.20 [1.10;1.30]                    | <0.001  | 1.42 [1.31;1.55]                    | <0.001  |
| Use of public swimming pool or sauna | No                         | Ref                                 | Ref     | Ref                                 | Ref     |
|                                      | Yes                        | 0.84 [0.74;0.96]                    | 0.013   | 1.01 [0.88;1.16]                    | 0.89    |
| Grocery shopping                     | No                         | Ref                                 | Ref     | Ref                                 | Ref     |
|                                      | Yes                        | 0.52 [0.44;0.62]                    | <0.001  | 0.64 [0.54;0.76]                    | <0.001  |
| Restaurants/café                     | No                         | Ref                                 | Ref     | Ref                                 | Ref     |
|                                      | Yes                        | 1.10 [1.02;1.18]                    | 0.011   | 1.33 [1.24;1.43]                    | <0.001  |
| Bar                                  | No                         | Ref                                 | Ref     | Ref                                 | Ref     |
|                                      | Yes                        | 1.29 [1.17;1.43]                    | <0.001  | 1.59 [1.43;1.76]                    | <0.001  |
| Wearing a mask                       | No                         | Ref                                 | Ref     | Ref                                 | Ref     |
|                                      | Yes                        | 1.06 [0.68;1.66]                    | 0.8     | 1.49 [0.96;2.30]                    | 0.073   |
| Frequent handwashing                 | No                         | Ref                                 | Ref     | Ref                                 | Ref     |
|                                      | Yes                        | 1.11 [1.01;1.22]                    | 0.026   | 1.28 [1.16;1.41]                    | <0.001  |
| Frequent hand sanitizer use          | No                         | Ref                                 | Ref     | Ref                                 | Ref     |
|                                      | Yes                        | 0.80 [0.72;0.89]                    | <0.001  | 0.95 [0.85;1.06]                    | 0.34    |
| Sneezing in elbow                    | No                         | Ref                                 | Ref     | Ref                                 | Ref     |
|                                      | Yes                        | 1.02 [0.93;1.12]                    | 0.65    | 1.14 [1.03;1.25]                    | 0.011   |
| Avoiding handshakes                  | No                         | Ref                                 | Ref     | Ref                                 | Ref     |
|                                      | Yes                        | 0.72 [0.66;0.79]                    | <0.001  | 0.75 [0.68;0.83]                    | <0.001  |
| Avoiding hugs                        | No                         | Ref                                 | Ref     | Ref                                 | Ref     |
|                                      | Yes                        | 0.89 [0.83;0.96]                    | 0.0039  | 0.97 [0.90;1.05]                    | 0.48    |
| Physical distancing                  | No                         | Ref                                 | Ref     | Ref                                 | Ref     |
|                                      | Yes                        | 0.79 [0.72;0.86]                    | <0.001  | 0.79 [0.72;0.87]                    | <0.001  |
| Limiting public transport            | No                         | Ref                                 | Ref     | Ref                                 | Ref     |
|                                      | Yes                        | 1.05 [0.98;1.12]                    | 0.19    | 1.02 [0.95;1.09]                    | 0.64    |
| Avoiding social events               | No                         | Ref                                 | Ref     | Ref                                 | Ref     |
|                                      | Yes                        | 0.89 [0.83;0.96]                    | 0.0019  | 0.85 [0.79;0.92]                    | <0.001  |
| Staying more at home                 | No                         | Ref                                 | Ref     | Ref                                 | Ref     |
|                                      | Yes                        | 0.77 [0.72;0.82]                    | <0.001  | 0.60 [0.56;0.64]                    | <0.001  |

**eTable 6. Subgroup Analysis of Sex: Females (continued)**

| Questions                   | Options                           | Cases compared to negative controls |         | Cases compared to untested controls |         |
|-----------------------------|-----------------------------------|-------------------------------------|---------|-------------------------------------|---------|
|                             |                                   | Rate Ratio [CI]                     | P-value | Questions                           | P-value |
| Avoiding crowds             | No                                | Ref                                 | Ref     | Ref                                 | Ref     |
|                             | Yes                               | 0.93 [0.86;0.99]                    | 0.026   | 0.91 [0.85;0.98]                    | 0.0094  |
| Avoiding sports with others | No                                | Ref                                 | Ref     | Ref                                 | Ref     |
|                             | Yes                               | 0.95 [0.89;1.01]                    | 0.11    | 0.86 [0.80;0.91]                    | <0.001  |
| Limiting traveling          | No                                | Ref                                 | Ref     | Ref                                 | Ref     |
|                             | Yes                               | 1.00 [0.93;1.08]                    | 1       | 0.91 [0.84;0.98]                    | 0.016   |
| Limiting grocery shopping   | No                                | Ref                                 | Ref     | Ref                                 | Ref     |
|                             | Yes                               | 1.11 [1.04;1.18]                    | 0.0027  | 1.05 [0.98;1.13]                    | 0.15    |
| Attending large event       | No                                | Ref                                 | Ref     | Ref                                 | Ref     |
|                             | Yes, >30                          | 1.60 [1.39;1.84]                    | <0.001  | 2.33 [2.00;2.73]                    | <0.001  |
|                             | Yes, >50                          | 1.78 [1.54;2.05]                    | <0.001  | 2.28 [1.96;2.66]                    | <0.001  |
| Indoor/outdoor event        | No                                | Ref                                 | Ref     | Ref                                 | Ref     |
|                             | Indoor                            | 1.72 [1.54;1.91]                    | <0.001  | 2.45 [2.18;2.76]                    | <0.001  |
|                             | Outdoor                           | 1.18 [0.78;1.80]                    | 0.43    | 1.07 [0.70;1.64]                    | 0.74    |
| Primary employment          | Non-employed                      | Ref                                 | Ref     | Ref                                 | Ref     |
|                             | Student                           | 1.15 [0.95;1.39]                    | 0.1426  | 2.74 [2.27;3.31]                    | <0.001  |
|                             | Public employee                   | 1.29 [1.11;1.50]                    | 0.0012  | 4.49 [3.84;5.25]                    | <0.001  |
|                             | Private employee                  | 1.17 [1.00;1.37]                    | 0.0492  | 2.00 [1.71;2.34]                    | <0.001  |
|                             | Self employed                     | 1.40 [1.14;1.72]                    | 0.0016  | 2.11 [1.71;2.59]                    | <0.001  |
|                             | Other                             | 0.87 [0.70;1.08]                    | 0.2142  | 1.30 [1.05;1.61]                    | 0.018   |
| Type of occupation          | Non-employed                      | Ref                                 | Ref     | Ref                                 | Ref     |
|                             | At home                           | 1.00 [0.86;1.16]                    | 0.9946  | 1.46 [1.25;1.69]                    | <0.001  |
|                             | Own office                        | 1.19 [0.98;1.45]                    | 0.0728  | 2.00 [1.64;2.43]                    | <0.001  |
|                             | Shared office                     | 1.42 [1.21;1.66]                    | <0.001  | 2.13 [1.81;2.49]                    | <0.001  |
|                             | Retail, library or factory worker | 1.51 [1.26;1.83]                    | <0.001  | 1.77 [1.47;2.13]                    | <0.001  |
|                             | Social care or education          | 1.61 [1.38;1.86]                    | <0.001  | 6.57 [5.62;7.68]                    | <0.001  |
|                             | Healthcare sector                 | 1.24 [1.06;1.46]                    | 0.0079  | 7.96 [6.65;9.52]                    | <0.001  |
|                             | Transport (e.g. bus/taxi-driver)  | 1.41 [0.76;2.60]                    | 0.2759  | 2.47 [1.30;4.69]                    | 0.0057  |
| Outdoors (e.g. gardener)    | Outdoors (e.g. gardener)          | 0.69 [0.38;1.23]                    | 0.2102  | 1.23 [0.68;2.23]                    | 0.4874  |
|                             | Other                             | 1.27 [1.06;1.52]                    | 0.0086  | 1.82 [1.53;2.18]                    | <0.001  |
|                             | Other                             | 1.27 [1.06;1.52]                    | 0.0086  | 1.82 [1.53;2.18]                    | <0.001  |
| Contact to people at work   | No contact                        | Ref                                 | Ref     | Ref                                 | Ref     |
|                             | Yes, close                        | 1.28 [1.17;1.39]                    | <0.001  | 3.59 [3.26;3.95]                    | <0.001  |
|                             | Yes, other                        | 1.13 [1.03;1.23]                    | 0.011   | 1.44 [1.31;1.58]                    | <0.001  |
|                             | Non-employed                      | 0.86 [0.75;0.98]                    | 0.026   | 0.63 [0.55;0.72]                    | <0.001  |
| Household size              | 1 to 2 persons                    | Ref                                 | Ref     | Ref                                 | Ref     |
|                             | 3 to 4 persons                    | 1.01 [0.93;1.10]                    | 0.864   | 1.25 [1.15;1.37]                    | <0.001  |
|                             | >5 persons                        | 1.17 [1.01;1.36]                    | 0.035   | 1.73 [1.48;2.02]                    | <0.001  |
| Education level             | ISCED 0                           | Ref                                 | Ref     | Ref                                 | Ref     |
|                             | ISCED 1                           | 1.00 [0.88;1.13]                    | 0.97    | 1.29 [1.13;1.46]                    | <0.001  |
|                             | ISCED 2                           | 1.03 [0.91;1.18]                    | 0.622   | 1.68 [1.47;1.92]                    | <0.001  |
|                             | ISCED 3&4                         | 0.87 [0.75;1.00]                    | 0.057   | 1.10 [0.95;1.28]                    | 0.2     |
| Income                      | 1st quartile                      | Ref                                 | Ref     | Ref                                 | Ref     |
|                             | 2nd quartile                      | 0.87 [0.79;0.95]                    | 0.0034  | 0.96 [0.87;1.05]                    | 0.363   |
|                             | 3rd quartile                      | 0.89 [0.81;0.99]                    | 0.0248  | 1.01 [0.92;1.12]                    | 0.787   |
|                             | 4th quartile                      | 0.88 [0.79;0.97]                    | 0.0146  | 0.91 [0.81;1.01]                    | 0.069   |
| Ethnicity                   | Danish                            | Ref                                 | Ref     | Ref                                 | Ref     |
|                             | Other                             | 1.32 [1.19;1.45]                    | <0.001  | 2.82 [2.52;3.15]                    | <0.001  |

**eTable 7. Subgroup Analysis of Age Group 18-30 years**

| Questions                            | Options                    | Cases compared to negative controls |         | Cases compared to untested controls |         |
|--------------------------------------|----------------------------|-------------------------------------|---------|-------------------------------------|---------|
|                                      |                            | Rate Ratio [CI]                     | P-value | Questions                           | P-value |
| Contact w/ SARS-Cov-2 positive       | None                       | Ref                                 | Ref     | Ref                                 | Ref     |
|                                      | Other                      | 1.78 [1.57;2.02]                    | <0.001  | 14.14 [11.64;17.18]                 | <0.001  |
|                                      | Close (<2 meter, >30 min.) | 2.95 [2.64;3.29]                    | <0.001  | 31.13 [25.49;38.02]                 | <0.001  |
| Daily contacts                       | <10                        | Ref                                 | Ref     | Ref                                 | Ref     |
|                                      | 10 to 50                   | 1.13 [1.02;1.25]                    | 0.021   | 1.97 [1.76;2.20]                    | <0.001  |
|                                      | >50                        | 1.20 [0.99;1.46]                    | 0.064   | 1.53 [1.24;1.88]                    | <0.001  |
| Bus travel                           | No                         | Ref                                 | Ref     | Ref                                 | Ref     |
|                                      | Yes                        | 0.84 [0.76;0.93]                    | <0.001  | 0.87 [0.78;0.97]                    | 0.012   |
| Train travel                         | No                         | Ref                                 | Ref     | Ref                                 | Ref     |
|                                      | Yes                        | 0.92 [0.82;1.02]                    | 0.11    | 1.08 [0.97;1.21]                    | 0.16    |
| Ferry travel                         | No                         | Ref                                 | Ref     | Ref                                 | Ref     |
|                                      | Yes                        | 0.66 [0.49;0.88]                    | 0.0053  | 0.76 [0.56;1.04]                    | 0.084   |
| Airplane travel                      | No                         | Ref                                 | Ref     | Ref                                 | Ref     |
|                                      | Yes                        | 0.64 [0.44;0.91]                    | 0.015   | 0.97 [0.65;1.45]                    | 0.89    |
| Indoor sports                        | No                         | Ref                                 | Ref     | Ref                                 | Ref     |
|                                      | Yes                        | 1.20 [1.07;1.34]                    | 0.0025  | 1.80 [1.58;2.05]                    | <0.001  |
| Outdoor sports                       | No                         | Ref                                 | Ref     | Ref                                 | Ref     |
|                                      | Yes                        | 0.90 [0.78;1.05]                    | 0.19    | 1.20 [1.02;1.42]                    | 0.028   |
| Visiting a gym                       | No                         | Ref                                 | Ref     | Ref                                 | Ref     |
|                                      | Yes                        | 1.27 [1.15;1.41]                    | <0.001  | 1.70 [1.52;1.90]                    | <0.001  |
| Use of public swimming pool or sauna | No                         | Ref                                 | Ref     | Ref                                 | Ref     |
|                                      | Yes                        | 1.01 [0.83;1.23]                    | 0.91    | 1.18 [0.95;1.45]                    | 0.14    |
| Grocery shopping                     | No                         | Ref                                 | Ref     | Ref                                 | Ref     |
|                                      | Yes                        | 0.57 [0.45;0.74]                    | <0.001  | 0.80 [0.62;1.04]                    | 0.094   |
| Restaurants/cafés                    | No                         | Ref                                 | Ref     | Ref                                 | Ref     |
|                                      | Yes                        | 1.22 [1.10;1.36]                    | <0.001  | 1.79 [1.60;2.00]                    | <0.001  |
| Bar                                  | No                         | Ref                                 | Ref     | Ref                                 | Ref     |
|                                      | Yes                        | 1.39 [1.25;1.54]                    | <0.001  | 2.06 [1.83;2.31]                    | <0.001  |
| Wearing a mask                       | No                         | Ref                                 | Ref     | Ref                                 | Ref     |
|                                      | Yes                        | 1.16 [0.60;2.23]                    | 0.66    | 2.13 [1.13;4.02]                    | 0.02    |
| Frequent handwashing                 | No                         | Ref                                 | Ref     | Ref                                 | Ref     |
|                                      | Yes                        | 1.30 [1.16;1.46]                    | <0.001  | 1.61 [1.44;1.82]                    | <0.001  |
| Frequent hand sanitizer use          | No                         | Ref                                 | Ref     | Ref                                 | Ref     |
|                                      | Yes                        | 0.99 [0.86;1.13]                    | 0.84    | 1.17 [1.02;1.35]                    | 0.028   |
| Sneezing in elbow                    | No                         | Ref                                 | Ref     | Ref                                 | Ref     |
|                                      | Yes                        | 1.11 [0.98;1.25]                    | 0.088   | 1.39 [1.22;1.57]                    | <0.001  |
| Avoiding handshakes                  | No                         | Ref                                 | Ref     | Ref                                 | Ref     |
|                                      | Yes                        | 0.86 [0.77;0.96]                    | 0.0081  | 0.88 [0.78;0.99]                    | 0.037   |
| Avoiding hugs                        | No                         | Ref                                 | Ref     | Ref                                 | Ref     |
|                                      | Yes                        | 0.89 [0.81;0.98]                    | 0.019   | 0.94 [0.85;1.04]                    | 0.21    |
| Physical distancing                  | No                         | Ref                                 | Ref     | Ref                                 | Ref     |
|                                      | Yes                        | 0.93 [0.83;1.04]                    | 0.22    | 0.98 [0.87;1.11]                    | 0.8     |
| Limiting public transport            | No                         | Ref                                 | Ref     | Ref                                 | Ref     |
|                                      | Yes                        | 1.08 [0.98;1.18]                    | 0.12    | 1.03 [0.94;1.14]                    | 0.51    |
| Avoiding social events               | No                         | Ref                                 | Ref     | Ref                                 | Ref     |
|                                      | Yes                        | 0.81 [0.73;0.89]                    | <0.001  | 0.82 [0.74;0.91]                    | <0.001  |
| Staying more at home                 | No                         | Ref                                 | Ref     | Ref                                 | Ref     |
|                                      | Yes                        | 0.78 [0.71;0.86]                    | <0.001  | 0.78 [0.71;0.86]                    | <0.001  |

eTable 7. Subgroup Analysis of Age Group 18-30 years (continued)

| Questions                   | Options                           | Cases compared to negative controls |         | Cases compared to untested controls |         |
|-----------------------------|-----------------------------------|-------------------------------------|---------|-------------------------------------|---------|
|                             |                                   | Rate Ratio [CI]                     | P-value | Questions                           | P-value |
| Avoiding crowds             | No                                | Ref                                 | Ref     | Ref                                 | Ref     |
|                             | Yes                               | 0.97 [0.89;1.07]                    | 0.55    | 1.00 [0.90;1.10]                    | 0.94    |
| Avoiding sports with others | No                                | Ref                                 | Ref     | Ref                                 | Ref     |
|                             | Yes                               | 0.88 [0.81;0.97]                    | 0.0094  | 0.79 [0.72;0.87]                    | <0.001  |
| Limiting traveling          | No                                | Ref                                 | Ref     | Ref                                 | Ref     |
|                             | Yes                               | 1.16 [1.04;1.28]                    | 0.0057  | 1.15 [1.03;1.28]                    | 0.01    |
| Limiting grocery shopping   | No                                | Ref                                 | Ref     | Ref                                 | Ref     |
|                             | Yes                               | 1.05 [0.95;1.17]                    | 0.34    | 0.95 [0.85;1.07]                    | 0.41    |
| Attending large event       | No                                | Ref                                 | Ref     | Ref                                 | Ref     |
|                             | Yes, >30                          | 1.44 [1.20;1.74]                    | <0.001  | 2.29 [1.85;2.85]                    | <0.001  |
|                             | Yes, >50                          | 1.47 [1.21;1.80]                    | <0.001  | 2.63 [2.06;3.34]                    | <0.001  |
| Indoor/outdoor event        | No                                | Ref                                 | Ref     | Ref                                 | Ref     |
|                             | Indoor                            | 1.44 [1.24;1.67]                    | <0.001  | 2.64 [2.21;3.16]                    | <0.001  |
|                             | Outdoor                           | 1.65 [1.09;2.51]                    | 0.019   | 1.47 [0.95;2.29]                    | 0.085   |
| Primary employment          | Non-employed                      | Ref                                 | Ref     | Ref                                 | Ref     |
|                             | Student                           | 1.36 [1.00;1.83]                    | 0.0474  | 3.02 [2.26;4.04]                    | <0.001  |
|                             | Public employee                   | 1.54 [1.13;2.10]                    | 0.0062  | 4.76 [3.51;6.46]                    | <0.001  |
|                             | Private employee                  | 1.44 [1.06;1.95]                    | 0.018   | 2.38 [1.77;3.19]                    | <0.001  |
|                             | Self employed                     | 1.49 [0.94;2.36]                    | 0.0885  | 1.95 [1.23;3.10]                    | 0.0047  |
|                             | Other                             | 1.12 [0.72;1.76]                    | 0.6135  | 1.28 [0.82;1.98]                    | 0.2741  |
| Type of occupation          | Non-employed                      | Ref                                 | Ref     | Ref                                 | Ref     |
|                             | At home                           | 0.95 [0.775;1.17]                   | 0.6523  | 1.44 [1.17;1.78]                    | <0.001  |
|                             | Own office                        | 1.31 [0.979;1.75]                   | 0.0696  | 2.22 [1.64;3.01]                    | <0.001  |
|                             | Shared office                     | 1.39 [1.113;1.73]                   | 0.0036  | 2.16 [1.72;2.70]                    | <0.001  |
|                             | Retail, library or factory worker | 1.49 [1.181;1.87]                   | <0.001  | 1.57 [1.25;1.98]                    | <0.001  |
|                             | Social care or education          | 1.49 [1.205;1.85]                   | <0.001  | 4.69 [3.73;5.90]                    | <0.001  |
|                             | Healthcare sector                 | 1.43 [1.113;1.83]                   | 0.005   | 6.91 [5.19;9.21]                    | <0.001  |
|                             | Transport (e.g. bus/taxi-driver)  | 0.44 [0.098;1.95]                   | 0.2775  | 0.67 [0.15;2.99]                    | 0.6     |
|                             | Outdoors (e.g. gardener)          | 1.10 [0.720;1.69]                   | 0.65    | 1.04 [0.67;1.60]                    | 0.88    |
|                             | Other                             | 1.42 [1.104;1.82]                   | 0.0062  | 2.15 [1.67;2.77]                    | <0.001  |
| Contact to people at work   | No contact                        | Ref                                 | Ref     | Ref                                 | Ref     |
|                             | Yes, close                        | 1.27 [1.12;1.45]                    | <0.001  | 2.44 [2.11;2.83]                    | <0.001  |
|                             | Yes, other                        | 1.10 [0.97;1.25]                    | 0.12    | 1.10 [0.97;1.25]                    | 0.15    |
| Household size              | Non-employed                      | 0.90 [0.76;1.08]                    | 0.26    | 0.64 [0.54;0.76]                    | <0.001  |
|                             | 1 to 2 persons                    | Ref                                 | Ref     | Ref                                 | Ref     |
|                             | 3 to 4 persons                    | 0.97 [0.84;1.12]                    | 0.7     | 0.94 [0.81;1.09]                    | 0.403   |
| Education level             | >5 persons                        | 1.17 [0.93;1.46]                    | 0.18    | 1.34 [1.06;1.70]                    | 0.016   |
|                             | ISCED 0                           | Ref                                 | Ref     | Ref                                 | Ref     |
|                             | ISCED 1                           | 1.12 [0.93;1.35]                    | 0.2299  | 1.54 [1.29;1.85]                    | <0.001  |
|                             | ISCED 2                           | 1.37 [1.09;1.71]                    | 0.0058  | 1.83 [1.47;2.28]                    | <0.001  |
| Income                      | ISCED 3&4                         | 1.23 [0.92;1.64]                    | 0.1691  | 1.72 [1.29;2.31]                    | <0.001  |
|                             | 1st quartile                      | Ref                                 | Ref     | Ref                                 | Ref     |
|                             | 2nd quartile                      | 0.93 [0.82;1.06]                    | 0.27    | 0.95 [0.83;1.08]                    | 0.405   |
|                             | 3rd quartile                      | 0.95 [0.82;1.11]                    | 0.53    | 1.11 [0.95;1.29]                    | 0.198   |
| Ethnicity                   | 4th quartile                      | 1.00 [0.84;1.20]                    | 0.96    | 1.22 [1.02;1.47]                    | 0.031   |
|                             | Danish                            | Ref                                 | Ref     | Ref                                 | Ref     |

|  |       |                  |        |                  |        |
|--|-------|------------------|--------|------------------|--------|
|  | Other | 1.40 [1.22;1.62] | <0.001 | 2.58 [2.19;3.05] | <0.001 |
|--|-------|------------------|--------|------------------|--------|



**eTable 8. Subgroup Analysis of Age Group 30-60 years**

| Questions                            | Options                    | Cases compared to negative controls |         | Cases compared to untested controls |         |
|--------------------------------------|----------------------------|-------------------------------------|---------|-------------------------------------|---------|
|                                      |                            | Rate Ratio [CI]                     | P-value | Rate Ratio [CI]                     | P-value |
| Contact w/ SARS-Cov-2 positive       | None                       | Ref                                 | Ref     | Ref                                 | Ref     |
|                                      | Other                      | 1.65 [1.52;1.80]                    | <0.001  | 12.34 [10.92;13.96]                 | <0.001  |
|                                      | Close (<2 meter, >30 min.) | 2.80 [2.57;3.04]                    | <0.001  | 30.66 [26.50;35.47]                 | <0.001  |
| Daily contacts                       | <10                        | Ref                                 | Ref     | Ref                                 | Ref     |
|                                      | 10 to 50                   | 1.01 [0.94;1.09]                    | 0.752   | 1.77 [1.64;1.91]                    | <0.001  |
|                                      | >50                        | 1.25 [1.07;1.46]                    | 0.0057  | 1.91 [1.62;2.26]                    | <0.001  |
| Bus travel                           | No                         | Ref                                 | Ref     | Ref                                 | Ref     |
|                                      | Yes                        | 0.82 [0.75;0.89]                    | <0.001  | 0.85 [0.77;0.93]                    | <0.001  |
| Train travel                         | No                         | Ref                                 | Ref     | Ref                                 | Ref     |
|                                      | Yes                        | 0.81 [0.75;0.87]                    | <0.001  | 0.89 [0.82;0.96]                    | 0.0032  |
| Ferry travel                         | No                         | Ref                                 | Ref     | Ref                                 | Ref     |
|                                      | Yes                        | 0.77 [0.65;0.92]                    | 0.0039  | 0.80 [0.67;0.95]                    | 0.012   |
| Airplane travel                      | No                         | Ref                                 | Ref     | Ref                                 | Ref     |
|                                      | Yes                        | 0.76 [0.59;0.99]                    | 0.04    | 1.38 [1.04;1.83]                    | 0.027   |
| Indoor sports                        | No                         | Ref                                 | Ref     | Ref                                 | Ref     |
|                                      | Yes                        | 1.14 [1.05;1.24]                    | 0.0016  | 1.42 [1.30;1.55]                    | <0.001  |
| Outdoor sports                       | No                         | Ref                                 | Ref     | Ref                                 | Ref     |
|                                      | Yes                        | 0.69 [0.62;0.77]                    | <0.001  | 0.86 [0.77;0.96]                    | 0.0082  |
| Visiting a gym                       | No                         | Ref                                 | Ref     | Ref                                 | Ref     |
|                                      | Yes                        | 1.29 [1.19;1.41]                    | <0.001  | 1.48 [1.35;1.61]                    | <0.001  |
| Use of public swimming pool or sauna | No                         | Ref                                 | Ref     | Ref                                 | Ref     |
|                                      | Yes                        | 0.81 [0.71;0.92]                    | 0.0011  | 1.01 [0.88;1.15]                    | 0.92    |
| Grocery shopping                     | No                         | Ref                                 | Ref     | Ref                                 | Ref     |
|                                      | Yes                        | 0.46 [0.39;0.55]                    | <0.001  | 0.46 [0.39;0.55]                    | <0.001  |
| Restaurants/cafés                    | No                         | Ref                                 | Ref     | Ref                                 | Ref     |
|                                      | Yes                        | 1.00 [0.93;1.08]                    | 0.93    | 1.20 [1.12;1.29]                    | <0.001  |
| Bar                                  | No                         | Ref                                 | Ref     | Ref                                 | Ref     |
|                                      | Yes                        | 1.21 [1.10;1.34]                    | <0.001  | 1.36 [1.22;1.51]                    | <0.001  |
| Wearing a mask                       | No                         | Ref                                 | Ref     | Ref                                 | Ref     |
|                                      | Yes                        | 1.02 [0.69;1.52]                    | 0.92    | 1.51 [1.01;2.25]                    | 0.045   |
| Frequent handwashing                 | No                         | Ref                                 | Ref     | Ref                                 | Ref     |
|                                      | Yes                        | 1.01 [0.92;1.11]                    | 0.78    | 1.21 [1.10;1.34]                    | <0.001  |
| Frequent hand sanitizer use          | No                         | Ref                                 | Ref     | Ref                                 | Ref     |
|                                      | Yes                        | 0.70 [0.63;0.78]                    | <0.001  | 0.93 [0.84;1.03]                    | 0.16    |
| Sneezing in elbow                    | No                         | Ref                                 | Ref     | Ref                                 | Ref     |
|                                      | Yes                        | 0.94 [0.86;1.03]                    | 0.22    | 1.16 [1.06;1.28]                    | 0.0016  |
| Avoiding handshakes                  | No                         | Ref                                 | Ref     | Ref                                 | Ref     |
|                                      | Yes                        | 0.69 [0.63;0.76]                    | <0.001  | 0.75 [0.68;0.83]                    | <0.001  |
| Avoiding hugs                        | No                         | Ref                                 | Ref     | Ref                                 | Ref     |
|                                      | Yes                        | 0.90 [0.83;0.97]                    | 0.0066  | 1.00 [0.92;1.08]                    | 0.94    |
| Physical distancing                  | No                         | Ref                                 | Ref     | Ref                                 | Ref     |
|                                      | Yes                        | 0.75 [0.68;0.81]                    | <0.001  | 0.80 [0.73;0.88]                    | <0.001  |
| Limiting public transport            | No                         | Ref                                 | Ref     | Ref                                 | Ref     |
|                                      | Yes                        | 1.01 [0.94;1.08]                    | 0.77    | 1.07 [1.00;1.15]                    | 0.064   |
| Avoiding social events               | No                         | Ref                                 | Ref     | Ref                                 | Ref     |
|                                      | Yes                        | 0.83 [0.78;0.90]                    | <0.001  | 0.87 [0.80;0.93]                    | <0.001  |

|                      |     |                  |        |                  |        |
|----------------------|-----|------------------|--------|------------------|--------|
| Staying more at home | No  | Ref              | Ref    | Ref              | Ref    |
|                      | Yes | 0.73 [0.68;0.78] | <0.001 | 0.60 [0.56;0.65] | <0.001 |

**eTable 8. Subgroup Analysis of Age Group 30-60 years (continued)**

| Questions                   | Options                           | Cases compared to negative controls |         | Cases compared to untested controls |         |
|-----------------------------|-----------------------------------|-------------------------------------|---------|-------------------------------------|---------|
|                             |                                   | Rate Ratio [CI]                     | P-value | Rate Ratio [CI]                     | P-value |
| Avoiding crowds             | No                                | Ref                                 | Ref     | Ref                                 | Ref     |
|                             | Yes                               | 0.89 [0.83;0.95]                    | <0.001  | 0.95 [0.89;1.02]                    | 0.18    |
| Avoiding sports with others | No                                | Ref                                 | Ref     | Ref                                 | Ref     |
|                             | Yes                               | 0.91 [0.85;0.97]                    | 0.0032  | 0.85 [0.80;0.91]                    | <0.001  |
| Limiting traveling          | No                                | Ref                                 | Ref     | Ref                                 | Ref     |
|                             | Yes                               | 0.91 [0.84;0.98]                    | 0.0098  | 0.85 [0.78;0.92]                    | <0.001  |
| Limiting grocery shopping   | No                                | Ref                                 | Ref     | Ref                                 | Ref     |
|                             | Yes                               | 1.08 [1.01;1.15]                    | 0.019   | 1.10 [1.03;1.18]                    | 0.0067  |
| Attending large event       | No                                | Ref                                 | Ref     | Ref                                 | Ref     |
|                             | Yes, >30                          | 1.55 [1.35;1.79]                    | <0.001  | 2.10 [1.80;2.46]                    | <0.001  |
|                             | Yes, >50                          | 1.77 [1.54;2.03]                    | <0.001  | 2.00 [1.73;2.32]                    | <0.001  |
| Indoor/outdoor event        | No                                | Ref                                 | Ref     | Ref                                 | Ref     |
|                             | Indoor                            | 1.71 [1.54;1.90]                    | <0.001  | 2.16 [1.93;2.43]                    | <0.001  |
|                             | Outdoor                           | 1.15 [0.81;1.62]                    | 0.44    | 1.23 [0.86;1.76]                    | 0.26    |
| Primary employment          | Non-employed                      | Ref                                 | Ref     | Ref                                 | Ref     |
|                             | Student                           | 1.29 [0.94;1.77]                    | 0.122   | 2.50 [1.80;3.46]                    | <0.001  |
|                             | Public employee                   | 1.39 [1.15;1.68]                    | <0.001  | 4.71 [3.91;5.68]                    | <0.001  |
|                             | Private employee                  | 1.27 [1.05;1.54]                    | 0.012   | 2.31 [1.92;2.78]                    | <0.001  |
|                             | Self employed                     | 1.46 [1.18;1.81]                    | <0.001  | 2.37 [1.92;2.93]                    | <0.001  |
|                             | Other                             | 1.24 [0.94;1.63]                    | 0.124   | 1.86 [1.42;2.44]                    | <0.001  |
| Type of occupation          | Non-employed                      | Ref                                 | Ref     | Ref                                 | Ref     |
|                             | At home                           | 0.94 [0.78;1.14]                    | 0.5499  | 1.57 [1.30; 1.90]                   | <0.001  |
|                             | Own office                        | 1.23 [1.00;1.51]                    | 0.0492  | 2.42 [1.97; 2.97]                   | <0.001  |
|                             | Shared office                     | 1.32 [1.09;1.60]                    | 0.0046  | 2.51 [2.08; 3.03]                   | <0.001  |
|                             | Retail, library or factory worker | 1.47 [1.17;1.85]                    | 0.0011  | 2.15 [1.71; 2.69]                   | <0.001  |
|                             | Social care or education          | 1.50 [1.24;1.82]                    | <0.001  | 7.65 [6.29; 9.29]                   | <0.001  |
|                             | Healthcare sector                 | 1.19 [0.97;1.45]                    | 0.1011  | 9.77 [7.84;12.17]                   | <0.001  |
|                             | Transport (e.g. bus/taxi-driver)  | 1.37 [0.95;1.99]                    | 0.0937  | 2.79 [1.89; 4.11]                   | <0.001  |
|                             | Outdoors (e.g. gardener)          | 1.24 [0.94;1.63]                    | 0.1343  | 1.62 [1.23; 2.14]                   | <0.001  |
|                             | Other                             | 1.19 [0.96;1.48]                    | 0.1119  | 2.08 [1.68; 2.59]                   | <0.001  |
| Contact to people at work   | No contact                        | Ref                                 | Ref     | Ref                                 | Ref     |
|                             | Yes, close                        | 1.24 [1.13;1.35]                    | <0.001  | 3.27 [2.97;3.61]                    | <0.001  |
|                             | Yes, other                        | 1.11 [1.03;1.21]                    | 0.011   | 1.37 [1.26;1.49]                    | <0.001  |
| Household size              | Non-employed                      | 0.86 [0.72;1.03]                    | 0.104   | 0.52 [0.44;0.62]                    | <0.001  |
|                             | 1 to 2 persons                    | Ref                                 | Ref     | Ref                                 | Ref     |
|                             | 3 to 4 persons                    | 0.94 [0.88;1.01]                    | 0.099   | 1.37 [1.27;1.48]                    | <0.001  |
| Education level             | >5 persons                        | 1.14 [1.00;1.29]                    | 0.051   | 1.99 [1.74;2.28]                    | <0.001  |
|                             | ISCED 0                           | Ref                                 | Ref     | Ref                                 | Ref     |
|                             | ISCED 1                           | 0.95 [0.83;1.08]                    | 0.4486  | 1.14 [0.99;1.30]                    | 0.06    |
|                             | ISCED 2                           | 0.96 [0.84;1.09]                    | 0.5068  | 1.57 [1.37;1.79]                    | <0.001  |
| Income                      | ISCED 3&4                         | 0.80 [0.70;0.91]                    | 0.0011  | 1.10 [0.96;1.26]                    | 0.18    |
|                             | 1st quartile                      | Ref                                 | Ref     | Ref                                 | Ref     |
|                             | 2nd quartile                      | 0.79 [0.72;0.88]                    | <0.001  | 1.02 [0.92;1.13]                    | 0.72    |
|                             | 3rd quartile                      | 0.83 [0.75;0.91]                    | <0.001  | 1.06 [0.96;1.17]                    | 0.276   |
| Ethnicity                   | 4th quartile                      | 0.79 [0.71;0.87]                    | <0.001  | 0.90 [0.80;1.00]                    | 0.041   |
|                             | Danish                            | Ref                                 | Ref     | Ref                                 | Ref     |

|  |       |                  |        |                  |        |
|--|-------|------------------|--------|------------------|--------|
|  | Other | 1.36 [1.24;1.49] | <0.001 | 3.44 [3.09;3.84] | <0.001 |
|--|-------|------------------|--------|------------------|--------|

**eTable 9. Subgroup Analysis of Age Group >60 years**

| Questions                            | Options                    | Cases compared to negative controls |         | Cases compared to untested controls |         |
|--------------------------------------|----------------------------|-------------------------------------|---------|-------------------------------------|---------|
|                                      |                            | Rate Ratio [CI]                     | P-value | Rate Ratio [CI]                     | P-value |
| Contact w/ SARS-Cov-2 positive       | None                       | Ref                                 | Ref     | Ref                                 | Ref     |
|                                      | Other                      | 2.16 [1.76;2.65]                    | <0.001  | 17.99 [12.52;25.85]                 | <0.001  |
| Daily contacts                       | Close (<2 meter, >30 min.) | 4.51 [3.69;5.50]                    | <0.001  | 57.68 [36.74;90.56]                 | <0.001  |
|                                      | <10                        | Ref                                 | Ref     | Ref                                 | Ref     |
|                                      | 10 to 50                   | 1.02 [0.85;1.24]                    | 0.818   | 1.89 [1.53;2.33]                    | <0.001  |
| Bus travel                           | >50                        | 1.48 [0.93;2.37]                    | 0.099   | 1.93 [1.16;3.19]                    | 0.011   |
|                                      | No                         | Ref                                 | Ref     | Ref                                 | Ref     |
| Train travel                         | Yes                        | 0.84 [0.70;1.01]                    | 0.065   | 0.94 [0.78;1.15]                    | 0.56    |
|                                      | No                         | Ref                                 | Ref     | Ref                                 | Ref     |
| Ferry travel                         | Yes                        | 1.00 [0.84;1.18]                    | 0.98    | 1.17 [0.98;1.39]                    | 0.076   |
|                                      | No                         | Ref                                 | Ref     | Ref                                 | Ref     |
| Airplane travel                      | Yes                        | 0.96 [0.69;1.33]                    | 0.81    | 1.26 [0.90;1.76]                    | 0.17    |
|                                      | No                         | Ref                                 | Ref     | Ref                                 | Ref     |
| Indoor sports                        | Yes                        | 0.55 [0.29;1.01]                    | 0.055   | 1.43 [0.71;2.88]                    | 0.32    |
|                                      | No                         | Ref                                 | Ref     | Ref                                 | Ref     |
| Outdoor sports                       | Yes                        | 1.15 [0.95;1.38]                    | 0.14    | 1.59 [1.31;1.93]                    | <0.001  |
|                                      | No                         | Ref                                 | Ref     | Ref                                 | Ref     |
| Visiting a gym                       | Yes                        | 0.74 [0.57;0.96]                    | 0.021   | 0.97 [0.74;1.26]                    | 0.81    |
|                                      | No                         | Ref                                 | Ref     | Ref                                 | Ref     |
| Use of public swimming pool or sauna | Yes                        | 1.02 [0.81;1.28]                    | 0.86    | 1.48 [1.17;1.88]                    | 0.0013  |
|                                      | No                         | Ref                                 | Ref     | Ref                                 | Ref     |
| Grocery shopping                     | Yes                        | 1.02 [0.75;1.38]                    | 0.89    | 1.28 [0.94;1.76]                    | 0.12    |
|                                      | No                         | Ref                                 | Ref     | Ref                                 | Ref     |
| Restaurants/cafés                    | Yes                        | 0.64 [0.47;0.87]                    | 0.0043  | 0.94 [0.70;1.27]                    | 0.71    |
|                                      | No                         | Ref                                 | Ref     | Ref                                 | Ref     |
| Bar                                  | Yes                        | 1.11 [0.95;1.30]                    | 0.18    | 1.67 [1.42;1.97]                    | <0.001  |
|                                      | No                         | Ref                                 | Ref     | Ref                                 | Ref     |
| Wearing a mask                       | Yes                        | 1.35 [1.00;1.82]                    | 0.052   | 1.81 [1.33;2.47]                    | <0.001  |
|                                      | No                         | Ref                                 | Ref     | Ref                                 | Ref     |
| Frequent handwashing                 | Yes                        | 0.84 [0.32;2.17]                    | 0.71    | 1.52 [0.59;3.88]                    | 0.38    |
|                                      | No                         | Ref                                 | Ref     | Ref                                 | Ref     |
| Frequent hand sanitizer use          | Yes                        | 0.87 [0.71;1.07]                    | 0.19    | 0.80 [0.64;0.99]                    | 0.044   |
|                                      | No                         | Ref                                 | Ref     | Ref                                 | Ref     |
| Sneezing in elbow                    | Yes                        | 0.72 [0.59;0.90]                    | 0.0029  | 0.79 [0.64;0.99]                    | 0.042   |
|                                      | No                         | Ref                                 | Ref     | Ref                                 | Ref     |
| Avoiding handshakes                  | Yes                        | 0.95 [0.79;1.14]                    | 0.59    | 1.02 [0.84;1.23]                    | 0.87    |
|                                      | No                         | Ref                                 | Ref     | Ref                                 | Ref     |
| Avoiding hugs                        | Yes                        | 0.57 [0.46;0.70]                    | <0.001  | 0.49 [0.39;0.62]                    | <0.001  |
|                                      | No                         | Ref                                 | Ref     | Ref                                 | Ref     |
| Physical distancing                  | Yes                        | 0.79 [0.65;0.95]                    | 0.014   | 0.75 [0.62;0.92]                    | 0.0051  |
|                                      | No                         | Ref                                 | Ref     | Ref                                 | Ref     |
| Limiting public transport            | Yes                        | 0.66 [0.55;0.81]                    | <0.001  | 0.56 [0.45;0.69]                    | <0.001  |
|                                      | No                         | Ref                                 | Ref     | Ref                                 | Ref     |
| Avoiding social events               | Yes                        | 0.81 [0.70;0.94]                    | 0.0055  | 0.68 [0.58;0.79]                    | <0.001  |
|                                      | No                         | Ref                                 | Ref     | Ref                                 | Ref     |
| Staying more at home                 | Yes                        | 1.03 [0.89;1.19]                    | 0.7     | 0.83 [0.72;0.97]                    | 0.018   |
|                                      | No                         | Ref                                 | Ref     | Ref                                 | Ref     |
|                                      | Yes                        | 0.82 [0.68;0.97]                    | 0.024   | 0.88 [0.74;1.06]                    | 0.17    |

**eTable 9. Subgroup Analysis of Age Group >60 years (continued)**

| Questions                   | Options                           | Cases compared to negative controls |         | Cases compared to untested controls |         |
|-----------------------------|-----------------------------------|-------------------------------------|---------|-------------------------------------|---------|
|                             |                                   | Rate Ratio [CI]                     | P-value | Rate Ratio [CI]                     | P-value |
| Avoiding crowds             | No                                | Ref                                 | Ref     | Ref                                 | Ref     |
|                             | Yes                               | 0.73 [0.63;0.85]                    | <0.001  | 0.55 [0.47;0.64]                    | <0.001  |
| Avoiding sports with others | No                                | Ref                                 | Ref     | Ref                                 | Ref     |
|                             | Yes                               | 0.83 [0.72;0.95]                    | 0.0074  | 0.68 [0.59;0.79]                    | <0.001  |
| Limiting traveling          | No                                | Ref                                 | Ref     | Ref                                 | Ref     |
|                             | Yes                               | 0.84 [0.72;0.97]                    | 0.022   | 0.65 [0.55;0.76]                    | <0.001  |
| Limiting grocery shopping   | No                                | Ref                                 | Ref     | Ref                                 | Ref     |
|                             | Yes                               | 1.05 [0.92;1.21]                    | 0.45    | 0.87 [0.76;1.01]                    | 0.061   |
| Attending large event       | No                                | Ref                                 | Ref     | Ref                                 | Ref     |
|                             | Yes, >30                          | 1.27 [0.93;1.73]                    | 0.14    | 2.38 [1.65;3.44]                    | <0.001  |
|                             | Yes, >50                          | 2.08 [1.52;2.85]                    | <0.001  | 2.37 [1.67;3.36]                    | <0.001  |
|                             | Indoor/outdoor event              | No                                  | Ref     | Ref                                 | Ref     |
| Indoor/outdoor event        | Indoor                            | 1.68 [1.33;2.13]                    | <0.001  | 2.57 [1.96;3.38]                    | <0.001  |
|                             | Outdoor                           | 0.69 [0.26;1.83]                    | 0.46    | 1.00 [0.41;2.47]                    | 0.99    |
|                             | Primary employment                | Non-employed                        | Ref     | Ref                                 | Ref     |
| Primary employment          | Public employee                   | 1.18 [0.95;1.48]                    | 0.142   | 4.74 [3.68;6.11]                    | <0.001  |
|                             | Private employee                  | 1.26 [0.99;1.61]                    | 0.06    | 1.93 [1.50;2.48]                    | <0.001  |
|                             | Self employed                     | 1.02 [0.75;1.37]                    | 0.916   | 1.68 [1.24;2.27]                    | <0.001  |
|                             | Other                             | 0.80 [0.61;1.04]                    | 0.099   | 1.06 [0.81;1.38]                    | 0.67    |
| Type of occupation          | Non-employed                      | Ref                                 | Ref     | Ref                                 | Ref     |
|                             | At home                           | 0.81 [0.61;1.07]                    | 0.1429  | 1.20 [0.90; 1.60]                   | 0.2034  |
|                             | Own office                        | 1.19 [0.84;1.69]                    | 0.3233  | 2.36 [1.62; 3.44]                   | <0.001  |
|                             | Shared office                     | 1.39 [1.01;1.91]                    | 0.0414  | 2.63 [1.87; 3.71]                   | <0.001  |
|                             | Retail, library or factory worker | 1.45 [0.94;2.25]                    | 0.0944  | 2.23 [1.42; 3.52]                   | <0.001  |
|                             | Social care or education          | 1.50 [1.14;1.97]                    | 0.0041  | 8.30 [5.87;11.73]                   | <0.001  |
|                             | Healthcare sector                 | 1.03 [0.74;1.43]                    | 0.8752  | 6.88 [4.49;10.54]                   | <0.001  |
|                             | Transport (e.g. bus/taxi-driver)  | 1.64 [0.79;3.43]                    | 0.1869  | 1.68 [0.78; 3.63]                   | 0.1827  |
|                             | Outdoors (e.g. gardener)          | 0.83 [0.46;1.47]                    | 0.5176  | 1.24 [0.69; 2.23]                   | 0.4643  |
|                             | Other                             | 1.17 [0.88;1.57]                    | 0.2737  | 1.46 [1.10; 1.96]                   | 0.0099  |
|                             | Contact to people at work         | No contact                          | Ref     | Ref                                 | Ref     |
| Yes, close                  |                                   | 1.15 [0.88;1.50]                    | 0.32    | 4.22 [3.07;5.79]                    | <0.001  |
| Yes, other                  |                                   | 1.08 [0.84;1.38]                    | 0.54    | 1.75 [1.35;2.25]                    | <0.001  |
| Non-employed                |                                   | 0.94 [0.75;1.19]                    | 0.62    | 0.74 [0.58;0.93]                    | 0.012   |
| Household size              | 1 to 2 persons                    | Ref                                 | Ref     | Ref                                 | Ref     |
|                             | 3 to 4 persons                    | 1.11 [0.82;1.50]                    | 0.51    | 1.62 [1.16;2.28]                    | 0.0048  |
|                             | >5 persons                        | 1.97 [0.61;6.35]                    | 0.26    | 1.71 [0.39;7.64]                    | 0.4792  |
| Education level             | ISCED 0                           | Ref                                 | Ref     | Ref                                 | Ref     |
|                             | ISCED 1                           | 1.07 [0.87;1.33]                    | 0.52    | 1.38 [1.10;1.73]                    | 0.005   |
|                             | ISCED 2                           | 1.05 [0.84;1.31]                    | 0.68    | 1.59 [1.26;2.00]                    | <0.001  |
|                             | ISCED 3&4                         | 0.92 [0.71;1.19]                    | 0.54    | 1.48 [1.13;1.94]                    | 0.004   |
| Income                      | 1st quartile                      | Ref                                 | Ref     | Ref                                 | Ref     |
|                             | 2nd quartile                      | 0.97 [0.78;1.21]                    | 0.77    | 1.24 [1.00;1.54]                    | 0.054   |
|                             | 3rd quartile                      | 0.95 [0.76;1.19]                    | 0.66    | 1.28 [1.02;1.60]                    | 0.033   |
|                             | 4th quartile                      | 0.96 [0.77;1.19]                    | 0.71    | 1.43 [1.16;1.77]                    | 0.001   |
| Ethnicity                   | Danish                            | Ref                                 | Ref     | Ref                                 | Ref     |
|                             | Other                             | 1.06 [0.82;1.37]                    | 0.65    | 2.13 [1.58;2.88]                    | <0.001  |

**eTable 10. Subgroup Analysis of education level (ISCED group 0-1)**

| Questions                            | Options                    | Cases compared to negative controls |         | Cases compared to untested controls |         |
|--------------------------------------|----------------------------|-------------------------------------|---------|-------------------------------------|---------|
|                                      |                            | Rate Ratio [CI]                     | P-value | Rate Ratio [CI]                     | P-value |
| Contact w/ SARS-Cov-2 positive       | None                       | Ref                                 | Ref     | Ref                                 | Ref     |
|                                      | Other                      | 1.60 [1.44;1.77]                    | <0.001  | 10.97 [9.41;12.78]                  | <0.001  |
| Daily contacts                       | Close (<2 meter, >30 min.) | 2.95 [2.69;3.23]                    | <0.001  | 30.43 [25.75;35.95]                 | <0.001  |
|                                      | <10                        | Ref                                 | Ref     | Ref                                 | Ref     |
|                                      | 10 to 50                   | 1.01 [0.92;1.09]                    | 0.9     | 1.82 [1.66;1.99]                    | <0.001  |
| Bus travel                           | >50                        | 1.01 [0.85;1.20]                    | 0.92    | 1.18 [0.98;1.41]                    | 0.074   |
|                                      | No                         | Ref                                 | Ref     | Ref                                 | Ref     |
| Train travel                         | Yes                        | 0.83 [0.76;0.91]                    | <0.001  | 0.89 [0.81;0.98]                    | 0.014   |
|                                      | No                         | Ref                                 | Ref     | Ref                                 | Ref     |
| Ferry travel                         | Yes                        | 0.89 [0.81;0.97]                    | 0.012   | 1.01 [0.92;1.11]                    | 0.85    |
|                                      | No                         | Ref                                 | Ref     | Ref                                 | Ref     |
| Airplane travel                      | Yes                        | 0.64 [0.51;0.81]                    | <0.001  | 0.80 [0.64;1.01]                    | 0.061   |
|                                      | No                         | Ref                                 | Ref     | Ref                                 | Ref     |
| Indoor sports                        | Yes                        | 0.63 [0.45;0.88]                    | 0.0061  | 1.16 [0.81;1.68]                    | 0.42    |
|                                      | No                         | Ref                                 | Ref     | Ref                                 | Ref     |
| Outdoor sports                       | Yes                        | 1.13 [1.02;1.25]                    | 0.019   | 1.54 [1.38;1.72]                    | <0.001  |
|                                      | No                         | Ref                                 | Ref     | Ref                                 | Ref     |
| Visiting a gym                       | Yes                        | 0.78 [0.68;0.89]                    | <0.001  | 1.06 [0.93;1.22]                    | 0.39    |
|                                      | No                         | Ref                                 | Ref     | Ref                                 | Ref     |
| Use of public swimming pool or sauna | Yes                        | 1.28 [1.17;1.41]                    | <0.001  | 1.66 [1.51;1.84]                    | <0.001  |
|                                      | No                         | Ref                                 | Ref     | Ref                                 | Ref     |
| Grocery shopping                     | Yes                        | 0.93 [0.79;1.11]                    | 0.42    | 1.26 [1.05;1.51]                    | 0.013   |
|                                      | No                         | Ref                                 | Ref     | Ref                                 | Ref     |
| Restaurants/cafés                    | Yes                        | 0.51 [0.43;0.61]                    | <0.001  | 0.65 [0.54;0.78]                    | <0.001  |
|                                      | No                         | Ref                                 | Ref     | Ref                                 | Ref     |
| Bar                                  | Yes                        | 1.10 [1.01;1.20]                    | 0.027   | 1.52 [1.40;1.66]                    | <0.001  |
|                                      | No                         | Ref                                 | Ref     | Ref                                 | Ref     |
| Wearing a mask                       | Yes                        | 1.33 [1.20;1.48]                    | <0.001  | 1.85 [1.66;2.06]                    | <0.001  |
|                                      | No                         | Ref                                 | Ref     | Ref                                 | Ref     |
| Frequent handwashing                 | Yes                        | 1.10 [0.70;1.72]                    | 0.68    | 1.91 [1.23;2.95]                    | 0.0037  |
|                                      | No                         | Ref                                 | Ref     | Ref                                 | Ref     |
| Frequent hand sanitizer use          | Yes                        | 1.07 [0.98;1.18]                    | 0.15    | 1.25 [1.14;1.38]                    | <0.001  |
|                                      | No                         | Ref                                 | Ref     | Ref                                 | Ref     |
| Sneezing in elbow                    | Yes                        | 0.81 [0.73;0.89]                    | <0.001  | 0.95 [0.86;1.06]                    | 0.36    |
|                                      | No                         | Ref                                 | Ref     | Ref                                 | Ref     |
| Avoiding handshakes                  | Yes                        | 0.98 [0.89;1.07]                    | 0.6     | 1.11 [1.00;1.22]                    | 0.041   |
|                                      | No                         | Ref                                 | Ref     | Ref                                 | Ref     |
| Avoiding hugs                        | Yes                        | 0.72 [0.66;0.79]                    | <0.001  | 0.75 [0.68;0.82]                    | <0.001  |
|                                      | No                         | Ref                                 | Ref     | Ref                                 | Ref     |
| Physical distancing                  | Yes                        | 0.83 [0.76;0.90]                    | <0.001  | 0.87 [0.80;0.95]                    | 0.0014  |
|                                      | No                         | Ref                                 | Ref     | Ref                                 | Ref     |
| Limiting public transport            | Yes                        | 0.77 [0.70;0.84]                    | <0.001  | 0.75 [0.69;0.83]                    | <0.001  |
|                                      | No                         | Ref                                 | Ref     | Ref                                 | Ref     |
| Avoiding social events               | Yes                        | 0.99 [0.92;1.07]                    | 0.84    | 0.94 [0.87;1.02]                    | 0.14    |
|                                      | No                         | Ref                                 | Ref     | Ref                                 | Ref     |
| Staying more at home                 | Yes                        | 0.86 [0.80;0.93]                    | <0.001  | 0.83 [0.77;0.90]                    | <0.001  |
|                                      | No                         | Ref                                 | Ref     | Ref                                 | Ref     |
|                                      | Yes                        | 0.80 [0.74;0.87]                    | <0.001  | 0.76 [0.70;0.82]                    | <0.001  |

**eTable 10. Subgroup Analysis of education level (ISCED group 0-1) (continued)**

| Questions                   | Options                           | Cases compared to negative controls |         | Cases compared to untested controls |         |
|-----------------------------|-----------------------------------|-------------------------------------|---------|-------------------------------------|---------|
|                             |                                   | Rate Ratio [CI]                     | P-value | Rate Ratio [CI]                     | P-value |
| Avoiding crowds             | No                                | Ref                                 | Ref     | Ref                                 | Ref     |
|                             | Yes                               | 0.90 [0.83;0.97]                    | 0.0051  | 0.85 [0.79;0.92]                    | <0.001  |
| Avoiding sports with others | No                                | Ref                                 | Ref     | Ref                                 | Ref     |
|                             | Yes                               | 0.87 [0.80;0.93]                    | <0.001  | 0.77 [0.71;0.83]                    | <0.001  |
| Limiting traveling          | No                                | Ref                                 | Ref     | Ref                                 | Ref     |
|                             | Yes                               | 1.01 [0.93;1.09]                    | 0.81    | 0.92 [0.85;1.00]                    | 0.059   |
| Limiting grocery shopping   | No                                | Ref                                 | Ref     | Ref                                 | Ref     |
|                             | Yes                               | 1.04 [0.96;1.13]                    | 0.28    | 1.01 [0.93;1.10]                    | 0.77    |
| Attending large event       | No                                | Ref                                 | Ref     | Ref                                 | Ref     |
|                             | Yes, >30                          | 1.47 [1.26;1.73]                    | <0.001  | 2.27 [1.89;2.72]                    | <0.001  |
|                             | Yes, >50                          | 1.54 [1.31;1.82]                    | <0.001  | 2.29 [1.89;2.76]                    | <0.001  |
| Indoor/outdoor event        | No                                | Ref                                 | Ref     | Ref                                 | Ref     |
|                             | Indoor                            | 1.53 [1.36;1.74]                    | <0.001  | 2.49 [2.16;2.87]                    | <0.001  |
|                             | Outdoor                           | 1.29 [0.89;1.87]                    | 0.19    | 1.27 [0.86;1.86]                    | 0.23    |
| Primary employment          | Non-employed                      | Ref                                 | Ref     | Ref                                 | Ref     |
|                             | Student                           | 1.26 [1.03;1.53]                    | 0.0215  | 3.06 [2.51;3.72]                    | <0.001  |
|                             | Public employee                   | 1.35 [1.13;1.62]                    | <0.001  | 5.61 [4.65;6.77]                    | <0.001  |
|                             | Private employee                  | 1.28 [1.07;1.52]                    | 0.0066  | 2.16 [1.81;2.57]                    | <0.001  |
|                             | Self employed                     | 1.35 [1.08;1.69]                    | 0.0095  | 2.03 [1.61;2.55]                    | <0.001  |
|                             | Other                             | 0.95 [0.75;1.21]                    | 0.7004  | 1.25 [0.98;1.59]                    | 0.069   |
| Type of occupation          | Non-employed                      | Ref                                 | Ref     | Ref                                 | Ref     |
|                             | At home                           | 0.97 [0.82;1.14]                    | 0.6946  | 1.44 [1.22;1.70]                    | <0.001  |
|                             | Own office                        | 1.36 [1.09;1.68]                    | 0.0052  | 1.96 [1.57;2.43]                    | <0.001  |
|                             | Shared office                     | 1.39 [1.17;1.65]                    | <0.001  | 2.42 [2.03;2.88]                    | <0.001  |
|                             | Retail, library or factory worker | 1.45 [1.21;1.73]                    | <0.001  | 1.60 [1.34;1.92]                    | <0.001  |
|                             | Social care or education          | 1.45 [1.23;1.71]                    | <0.001  | 6.62 [5.52;7.93]                    | <0.001  |
|                             | Healthcare sector                 | 1.25 [1.03;1.52]                    | 0.0257  | 7.67 [6.10;9.66]                    | <0.001  |
|                             | Transport (e.g. bus/taxi-driver)  | 1.33 [0.92;1.94]                    | 0.1304  | 1.75 [1.19;2.58]                    | 0.0048  |
|                             | Outdoors (e.g. gardener)          | 1.18 [0.93;1.51]                    | 0.1705  | 1.36 [1.07;1.73]                    | 0.0135  |
|                             | Other                             | 1.30 [1.09;1.56]                    | 0.0041  | 1.89 [1.58;2.26]                    | <0.001  |
| Contact to people at work   | No contact                        | Ref                                 | Ref     | Ref                                 | Ref     |
|                             | Yes, close                        | 1.13 [1.01;1.26]                    | 0.027   | 2.39 [2.12;2.69]                    | <0.001  |
|                             | Yes, other                        | 1.04 [0.94;1.15]                    | 0.463   | 1.12 [1.01;1.24]                    | 0.033   |
|                             | Non-employed                      | 0.89 [0.77;1.02]                    | 0.093   | 0.58 [0.50;0.66]                    | <0.001  |
| Household size              | 1 to 2 persons                    | Ref                                 | Ref     | Ref                                 | Ref     |
|                             | 3 to 4 persons                    | 0.99 [0.90;1.09]                    | 0.888   | 1.26 [1.14;1.39]                    | <0.001  |
|                             | >5 persons                        | 1.28 [1.09;1.50]                    | 0.0028  | 1.92 [1.61;2.29]                    | <0.001  |
| Education level             | ISCED 0                           | Ref                                 | Ref     | Ref                                 | Ref     |
|                             | ISCED 1                           | 1.03 [0.93;1.13]                    | 0.62    | 1.28 [1.16;1.42]                    | <0.001  |
| Income                      | 1st quartile                      | Ref                                 | Ref     | Ref                                 | Ref     |
|                             | 2nd quartile                      | 0.88 [0.79;0.97]                    | 0.014   | 0.99 [0.89;1.10]                    | 0.86    |
|                             | 3rd quartile                      | 0.91 [0.82;1.02]                    | 0.107   | 1.09 [0.97;1.22]                    | 0.15    |
|                             | 4th quartile                      | 0.98 [0.86;1.10]                    | 0.691   | 1.11 [0.98;1.25]                    | 0.1     |
| Ethnicity                   | Danish                            | Ref                                 | Ref     | Ref                                 | Ref     |
|                             | Other                             | 1.60 [1.42;1.80]                    | <0.001  | 2.69 [2.35;3.08]                    | <0.001  |



**eTable 11. Subgroup Analysis of Education Level (ISCED 2-4)**

| Questions                            | Options                    | Cases compared to negative controls |         | Cases compared to untested controls |         |
|--------------------------------------|----------------------------|-------------------------------------|---------|-------------------------------------|---------|
|                                      |                            | Rate Ratio [CI]                     | P-value | Rate Ratio [CI]                     | P-value |
| Contact w/ SARS-Cov-2 positive       | None                       | Ref                                 | Ref     | Ref                                 | Ref     |
|                                      | Other                      | 1.90 [1.73;2.09]                    | <0.001  | 15.28 [13.18;17.70]                 | <0.001  |
| Daily contacts                       | Close (<2 meter, >30 min.) | 3.04 [2.77;3.33]                    | <0.001  | 34.91 [29.21;41.72]                 | <0.001  |
|                                      | <10                        | Ref                                 | Ref     | Ref                                 | Ref     |
|                                      | 10 to 50                   | 1.09 [1.01;1.19]                    | 0.035   | 1.86 [1.70;2.03]                    | <0.001  |
| Bus travel                           | >50                        | 1.55 [1.30;1.84]                    | <0.001  | 3.07 [2.51;3.76]                    | <0.001  |
|                                      | No                         | Ref                                 | Ref     | Ref                                 | Ref     |
| Train travel                         | Yes                        | 0.84 [0.76;0.92]                    | <0.001  | 0.85 [0.77;0.94]                    | 0.0015  |
|                                      | No                         | Ref                                 | Ref     | Ref                                 | Ref     |
| Ferry travel                         | Yes                        | 0.86 [0.79;0.93]                    | <0.001  | 0.93 [0.85;1.01]                    | 0.1     |
|                                      | No                         | Ref                                 | Ref     | Ref                                 | Ref     |
| Airplane travel                      | Yes                        | 0.85 [0.71;1.02]                    | 0.078   | 0.85 [0.70;1.02]                    | 0.088   |
|                                      | No                         | Ref                                 | Ref     | Ref                                 | Ref     |
| Indoor sports                        | Yes                        | 0.83 [0.63;1.09]                    | 0.18    | 1.34 [0.98;1.82]                    | 0.063   |
|                                      | No                         | Ref                                 | Ref     | Ref                                 | Ref     |
| Outdoor sports                       | Yes                        | 1.16 [1.06;1.26]                    | 0.0017  | 1.44 [1.31;1.59]                    | <0.001  |
|                                      | No                         | Ref                                 | Ref     | Ref                                 | Ref     |
| Visiting a gym                       | Yes                        | 0.73 [0.65;0.83]                    | <0.001  | 0.87 [0.77;0.99]                    | 0.033   |
|                                      | No                         | Ref                                 | Ref     | Ref                                 | Ref     |
| Use of public swimming pool or sauna | Yes                        | 1.29 [1.18;1.42]                    | <0.001  | 1.53 [1.39;1.69]                    | <0.001  |
|                                      | No                         | Ref                                 | Ref     | Ref                                 | Ref     |
| Grocery shopping                     | Yes                        | 0.83 [0.72;0.95]                    | 0.0068  | 0.94 [0.82;1.09]                    | 0.44    |
|                                      | No                         | Ref                                 | Ref     | Ref                                 | Ref     |
| Restaurants/cafés                    | Yes                        | 0.52 [0.42;0.64]                    | <0.001  | 0.60 [0.48;0.74]                    | <0.001  |
|                                      | No                         | Ref                                 | Ref     | Ref                                 | Ref     |
| Bar                                  | Yes                        | 1.06 [0.98;1.15]                    | 0.13    | 1.27 [1.16;1.38]                    | <0.001  |
|                                      | No                         | Ref                                 | Ref     | Ref                                 | Ref     |
| Wearing a mask                       | Yes                        | 1.26 [1.13;1.40]                    | <0.001  | 1.50 [1.34;1.69]                    | <0.001  |
|                                      | No                         | Ref                                 | Ref     | Ref                                 | Ref     |
| Frequent handwashing                 | Yes                        | 1.14 [0.67;1.92]                    | 0.63    | 1.57 [0.88;2.81]                    | 0.12    |
|                                      | No                         | Ref                                 | Ref     | Ref                                 | Ref     |
| Frequent hand sanitizer use          | Yes                        | 1.16 [1.04;1.30]                    | 0.008   | 1.46 [1.30;1.64]                    | <0.001  |
|                                      | No                         | Ref                                 | Ref     | Ref                                 | Ref     |
| Sneezing in elbow                    | Yes                        | 0.78 [0.68;0.89]                    | <0.001  | 1.10 [0.96;1.25]                    | 0.18    |
|                                      | No                         | Ref                                 | Ref     | Ref                                 | Ref     |
| Avoiding handshakes                  | Yes                        | 1.06 [0.95;1.18]                    | 0.33    | 1.37 [1.22;1.54]                    | <0.001  |
|                                      | No                         | Ref                                 | Ref     | Ref                                 | Ref     |
| Avoiding hugs                        | Yes                        | 0.78 [0.69;0.88]                    | <0.001  | 0.83 [0.73;0.95]                    | 0.0057  |
|                                      | No                         | Ref                                 | Ref     | Ref                                 | Ref     |
| Physical distancing                  | Yes                        | 1.00 [0.91;1.10]                    | 0.93    | 1.09 [0.98;1.20]                    | 0.11    |
|                                      | No                         | Ref                                 | Ref     | Ref                                 | Ref     |
| Limiting public transport            | Yes                        | 0.84 [0.75;0.94]                    | 0.0022  | 0.99 [0.88;1.11]                    | 0.82    |
|                                      | No                         | Ref                                 | Ref     | Ref                                 | Ref     |
| Avoiding social events               | Yes                        | 1.06 [0.98;1.15]                    | 0.17    | 1.10 [1.01;1.20]                    | 0.026   |
|                                      | No                         | Ref                                 | Ref     | Ref                                 | Ref     |
| Staying more at home                 | Yes                        | 0.84 [0.77;0.92]                    | <0.001  | 0.90 [0.82;0.98]                    | 0.016   |
|                                      | No                         | Ref                                 | Ref     | Ref                                 | Ref     |
|                                      | Yes                        | 0.72 [0.67;0.78]                    | <0.001  | 0.56 [0.52;0.61]                    | <0.001  |

**eTable 11. Subgroup Analysis of Education Level (ISCED 2-4) (continued)**

| Questions                   | Options                           | Cases compared to negative controls |         | Cases compared to untested controls |         |
|-----------------------------|-----------------------------------|-------------------------------------|---------|-------------------------------------|---------|
|                             |                                   | Rate Ratio [CI]                     | P-value | Rate Ratio [CI]                     | P-value |
| Avoiding crowds             | No                                | Ref                                 | Ref     | Ref                                 | Ref     |
|                             | Yes                               | 0.91 [0.84;0.98]                    | 0.014   | 1.00 [0.92;1.09]                    | 0.97    |
| Avoiding sports with others | No                                | Ref                                 | Ref     | Ref                                 | Ref     |
|                             | Yes                               | 0.90 [0.84;0.97]                    | 0.004   | 0.86 [0.79;0.93]                    | <0.001  |
| Limiting traveling          | No                                | Ref                                 | Ref     | Ref                                 | Ref     |
|                             | Yes                               | 0.91 [0.83;0.99]                    | 0.034   | 0.88 [0.80;0.97]                    | 0.01    |
| Limiting grocery shopping   | No                                | Ref                                 | Ref     | Ref                                 | Ref     |
|                             | Yes                               | 1.10 [1.02;1.19]                    | 0.011   | 1.10 [1.01;1.19]                    | 0.021   |
| Attending large event       | No                                | Ref                                 | Ref     | Ref                                 | Ref     |
|                             | Yes, >30                          | 1.49 [1.28;1.74]                    | <0.001  | 2.06 [1.73;2.45]                    | <0.001  |
|                             | Yes, >50                          | 1.89 [1.63;2.21]                    | <0.001  | 2.10 [1.78;2.47]                    | <0.001  |
| Indoor/outdoor event        | No                                | Ref                                 | Ref     | Ref                                 | Ref     |
|                             | Indoor                            | 1.70 [1.51;1.91]                    | <0.001  | 2.14 [1.88;2.43]                    | <0.001  |
|                             | Outdoor                           | 1.34 [0.90;1.99]                    | 0.15    | 1.41 [0.94;2.11]                    | 0.1     |
| Primary employment          | Non-employed                      | Ref                                 | Ref     | Ref                                 | Ref     |
|                             | Student                           | 1.11 [0.78;1.58]                    | 0.572   | 2.20 [1.53;3.18]                    | <0.001  |
|                             | Public employee                   | 1.28 [1.06;1.54]                    | 0.0097  | 3.72 [3.06;4.52]                    | <0.001  |
|                             | Private employee                  | 1.16 [0.96;1.41]                    | 0.1137  | 2.00 [1.64;2.43]                    | <0.001  |
|                             | Self employed                     | 1.30 [1.04;1.62]                    | 0.0218  | 2.12 [1.69;2.67]                    | <0.001  |
| Type of occupation          | Other                             | 1.17 [0.88;1.55]                    | 0.2776  | 1.82 [1.36;2.44]                    | <0.001  |
|                             | Non-employed                      | Ref                                 | Ref     | Ref                                 | Ref     |
|                             | At home                           | 0.86 [0.71;1.04]                    | 0.1254  | 1.36 [1.12; 1.66]                   | 0.0021  |
|                             | Own office                        | 1.15 [0.93;1.42]                    | 0.1958  | 2.31 [1.85; 2.89]                   | <0.001  |
|                             | Shared office                     | 1.25 [1.02;1.52]                    | 0.0275  | 2.04 [1.67; 2.50]                   | <0.001  |
|                             | Retail, library or factory worker | 1.61 [1.20;2.17]                    | 0.0017  | 2.55 [1.89; 3.46]                   | <0.001  |
|                             | Social care or education          | 1.49 [1.22;1.81]                    | <0.001  | 5.98 [4.85; 7.38]                   | <0.001  |
|                             | Healthcare sector                 | 1.08 [0.87;1.33]                    | 0.4852  | 7.71 [6.09; 9.77]                   | <0.001  |
|                             | Transport (e.g. bus/taxi-driver)  | 1.29 [0.63;2.63]                    | 0.4894  | 4.59 [1.97;10.72]                   | <0.001  |
|                             | Outdoors (e.g. gardener)          | 1.03 [0.60;1.76]                    | 0.9282  | 1.47 [0.79; 2.74]                   | 0.2198  |
| Contact to people at work   | Other                             | 1.14 [0.90;1.45]                    | 0.2872  | 1.99 [1.54; 2.57]                   | <0.001  |
|                             | No contact                        | Ref                                 | Ref     | Ref                                 | Ref     |
|                             | Yes, close                        | 1.31 [1.19;1.45]                    | <0.001  | 3.78 [3.38;4.24]                    | <0.001  |
| Household size              | Yes, other                        | 1.19 [1.08;1.31]                    | <0.001  | 1.58 [1.43;1.74]                    | <0.001  |
|                             | Non-employed                      | 0.90 [0.75;1.09]                    | 0.28    | 0.62 [0.51;0.75]                    | <0.001  |
|                             | 1 to 2 persons                    | Ref                                 | Ref     | Ref                                 | Ref     |
| Education level             | 3 to 4 persons                    | 0.90 [0.82;0.99]                    | 0.029   | 1.23 [1.12;1.36]                    | <0.001  |
|                             | >5 persons                        | 1.07 [0.91;1.26]                    | 0.441   | 1.60 [1.34;1.91]                    | <0.001  |
|                             | ISCED 2                           | Ref                                 | Ref     | Ref                                 | Ref     |
| Income                      | ISCED 3&4                         | 0.84 [0.77;0.90]                    | <0.001  | 0.73 [0.67;0.79]                    | <0.001  |
|                             | 1st quartile                      | Ref                                 | Ref     | Ref                                 | Ref     |
|                             | 2nd quartile                      | 0.84 [0.75;0.95]                    | 0.0052  | 1.06 [0.94;1.20]                    | 0.354   |
|                             | 3rd quartile                      | 0.84 [0.74;0.94]                    | 0.0033  | 1.02 [0.90;1.15]                    | 0.783   |
| Ethnicity                   | 4th quartile                      | 0.78 [0.69;0.89]                    | <0.001  | 0.85 [0.75;0.97]                    | 0.015   |
|                             | Danish                            | Ref                                 | Ref     | Ref                                 | Ref     |
|                             | Other                             | 1.15 [1.03;1.29]                    | 0.012   | 2.70 [2.35;3.09]                    | <0.001  |

**eTable 12. Subgroup Analysis of Household Size: 1-2 Members**

| Questions                            | Options                    | Cases compared to negative controls |         | Cases compared to untested controls |         |
|--------------------------------------|----------------------------|-------------------------------------|---------|-------------------------------------|---------|
|                                      |                            | Rate Ratio [CI]                     | P-value | Rate Ratio [CI]                     | P-value |
| Contact w/ SARS-Cov-2 positive       | None                       | Ref                                 | Ref     | Ref                                 | Ref     |
|                                      | Other                      | 1.69 [1.54;1.85]                    | <0.001  | 13.15 [11.49;15.05]                 | <0.001  |
| Daily contacts                       | Close (<2 meter, >30 min.) | 3.10 [2.85;3.37]                    | <0.001  | 33.35 [28.62;38.86]                 | <0.001  |
|                                      | <10                        | Ref                                 | Ref     | Ref                                 | Ref     |
|                                      | 10 to 50                   | 1.05 [0.97;1.13]                    | 0.225   | 1.82 [1.68;1.97]                    | <0.001  |
| Bus travel                           | >50                        | 1.22 [1.04;1.44]                    | 0.013   | 1.69 [1.43;2.00]                    | <0.001  |
|                                      | No                         | Ref                                 | Ref     | Ref                                 | Ref     |
| Train travel                         | Yes                        | 0.83 [0.76;0.89]                    | <0.001  | 0.86 [0.79;0.94]                    | <0.001  |
|                                      | No                         | Ref                                 | Ref     | Ref                                 | Ref     |
| Ferry travel                         | Yes                        | 0.88 [0.81;0.95]                    | <0.001  | 1.02 [0.94;1.10]                    | 0.66    |
|                                      | No                         | Ref                                 | Ref     | Ref                                 | Ref     |
| Airplane travel                      | Yes                        | 0.82 [0.69;0.97]                    | 0.022   | 0.92 [0.77;1.10]                    | 0.35    |
|                                      | No                         | Ref                                 | Ref     | Ref                                 | Ref     |
| Indoor sports                        | Yes                        | 0.64 [0.50;0.83]                    | <0.001  | 1.09 [0.82;1.45]                    | 0.55    |
|                                      | No                         | Ref                                 | Ref     | Ref                                 | Ref     |
| Outdoor sports                       | Yes                        | 1.16 [1.07;1.27]                    | <0.001  | 1.64 [1.50;1.79]                    | <0.001  |
|                                      | No                         | Ref                                 | Ref     | Ref                                 | Ref     |
| Visiting a gym                       | Yes                        | 0.78 [0.70;0.88]                    | <0.001  | 1.03 [0.91;1.16]                    | 0.65    |
|                                      | No                         | Ref                                 | Ref     | Ref                                 | Ref     |
| Use of public swimming pool or sauna | Yes                        | 1.24 [1.14;1.35]                    | <0.001  | 1.54 [1.41;1.68]                    | <0.001  |
|                                      | No                         | Ref                                 | Ref     | Ref                                 | Ref     |
| Grocery shopping                     | Yes                        | 0.97 [0.84;1.11]                    | 0.63    | 1.21 [1.04;1.40]                    | 0.011   |
|                                      | No                         | Ref                                 | Ref     | Ref                                 | Ref     |
| Restaurants/cafés                    | Yes                        | 0.53 [0.45;0.64]                    | <0.001  | 0.68 [0.57;0.80]                    | <0.001  |
|                                      | No                         | Ref                                 | Ref     | Ref                                 | Ref     |
| Bar                                  | Yes                        | 1.10 [1.02;1.18]                    | 0.012   | 1.53 [1.42;1.65]                    | <0.001  |
|                                      | No                         | Ref                                 | Ref     | Ref                                 | Ref     |
| Wearing a mask                       | Yes                        | 1.26 [1.15;1.38]                    | <0.001  | 1.71 [1.56;1.89]                    | <0.001  |
|                                      | No                         | Ref                                 | Ref     | Ref                                 | Ref     |
| Frequent handwashing                 | Yes                        | 1.36 [0.86;2.14]                    | 0.19    | 1.98 [1.26;3.11]                    | 0.0032  |
|                                      | No                         | Ref                                 | Ref     | Ref                                 | Ref     |
| Frequent hand sanitizer use          | Yes                        | 1.18 [1.07;1.29]                    | <0.001  | 1.41 [1.28;1.55]                    | <0.001  |
|                                      | No                         | Ref                                 | Ref     | Ref                                 | Ref     |
| Sneezing in elbow                    | Yes                        | 0.89 [0.81;0.99]                    | 0.034   | 1.11 [1.00;1.23]                    | 0.055   |
|                                      | No                         | Ref                                 | Ref     | Ref                                 | Ref     |
| Avoiding handshakes                  | Yes                        | 1.10 [1.00;1.20]                    | 0.051   | 1.33 [1.21;1.46]                    | <0.001  |
|                                      | No                         | Ref                                 | Ref     | Ref                                 | Ref     |
| Avoiding hugs                        | Yes                        | 0.83 [0.76;0.92]                    | <0.001  | 0.85 [0.77;0.93]                    | <0.001  |
|                                      | No                         | Ref                                 | Ref     | Ref                                 | Ref     |
| Physical distancing                  | Yes                        | 0.96 [0.89;1.04]                    | 0.32    | 0.99 [0.91;1.07]                    | 0.72    |
|                                      | No                         | Ref                                 | Ref     | Ref                                 | Ref     |
| Limiting public transport            | Yes                        | 0.84 [0.77;0.92]                    | <0.001  | 0.84 [0.77;0.93]                    | <0.001  |
|                                      | No                         | Ref                                 | Ref     | Ref                                 | Ref     |
| Avoiding social events               | Yes                        | 1.07 [0.99;1.14]                    | 0.071   | 1.00 [0.93;1.07]                    | 0.9     |
|                                      | No                         | Ref                                 | Ref     | Ref                                 | Ref     |
| Staying more at home                 | Yes                        | 0.96 [0.89;1.03]                    | 0.22    | 0.91 [0.84;0.98]                    | 0.011   |
|                                      | No                         | Ref                                 | Ref     | Ref                                 | Ref     |
|                                      | Yes                        | 0.82 [0.77;0.88]                    | <0.001  | 0.74 [0.69;0.80]                    | <0.001  |

**eTable 12. Subgroup Analysis of Household Size: 1-2 Members (continued)**

| Questions                   | Options                           | Cases compared to negative controls |         | Cases compared to untested controls |         |
|-----------------------------|-----------------------------------|-------------------------------------|---------|-------------------------------------|---------|
|                             |                                   | Rate Ratio [CI]                     | P-value | Rate Ratio [CI]                     | P-value |
| Avoiding crowds             | No                                | Ref                                 | Ref     | Ref                                 | Ref     |
|                             | Yes                               | 0.96 [0.90;1.03]                    | 0.3     | 0.94 [0.87;1.01]                    | 0.087   |
| Avoiding sports with others | No                                | Ref                                 | Ref     | Ref                                 | Ref     |
|                             | Yes                               | 0.91 [0.85;0.97]                    | 0.0046  | 0.81 [0.75;0.86]                    | <0.001  |
| Limiting traveling          | No                                | Ref                                 | Ref     | Ref                                 | Ref     |
|                             | Yes                               | 1.03 [0.96;1.11]                    | 0.43    | 0.92 [0.85;1.00]                    | 0.044   |
| Limiting grocery shopping   | No                                | Ref                                 | Ref     | Ref                                 | Ref     |
|                             | Yes                               | 1.09 [1.01;1.16]                    | 0.019   | 1.02 [0.95;1.10]                    | 0.56    |
| Attending large event       | No                                | Ref                                 | Ref     | Ref                                 | Ref     |
|                             | Yes, >30                          | 1.55 [1.35;1.79]                    | <0.001  | 2.27 [1.94;2.66]                    | <0.001  |
|                             | Yes, >50                          | 1.72 [1.49;1.98]                    | <0.001  | 2.33 [2.00;2.73]                    | <0.001  |
| Indoor/outdoor event        | No                                | Ref                                 | Ref     | Ref                                 | Ref     |
|                             | Indoor                            | 1.67 [1.50;1.85]                    | <0.001  | 2.44 [2.16;2.75]                    | <0.001  |
|                             | Outdoor                           | 1.30 [0.92;1.82]                    | 0.13    | 1.42 [1.00;2.01]                    | 0.048   |
| Primary employment          | Non-employed                      | Ref                                 | Ref     | Ref                                 | Ref     |
|                             | Student                           | 1.09 [0.91;1.30]                    | 0.364   | 2.72 [2.27;3.27]                    | <0.001  |
|                             | Public employee                   | 1.29 [1.12;1.49]                    | <0.001  | 4.56 [3.94;5.28]                    | <0.001  |
|                             | Private employee                  | 1.28 [1.11;1.47]                    | <0.001  | 2.32 [2.01;2.68]                    | <0.001  |
|                             | Self employed                     | 1.25 [1.04;1.51]                    | 0.017   | 2.06 [1.71;2.48]                    | <0.001  |
|                             | Other                             | 0.96 [0.78;1.17]                    | 0.68    | 1.35 [1.11;1.65]                    | 0.0032  |
| Type of occupation          | Non-employed                      | Ref                                 | Ref     | Ref                                 | Ref     |
|                             | At home                           | 0.95 [0.82;1.09]                    | 0.452   | 1.54 [1.34; 1.78]                   | <0.001  |
|                             | Own office                        | 1.36 [1.14;1.62]                    | <0.001  | 2.48 [2.07; 2.96]                   | <0.001  |
|                             | Shared office                     | 1.41 [1.21;1.63]                    | <0.001  | 2.33 [2.01; 2.70]                   | <0.001  |
|                             | Retail, library or factory worker | 1.53 [1.27;1.84]                    | <0.001  | 1.89 [1.58; 2.27]                   | <0.001  |
|                             | Social care or education          | 1.45 [1.25;1.69]                    | <0.001  | 6.75 [5.74; 7.94]                   | <0.001  |
|                             | Healthcare sector                 | 1.16 [0.99;1.37]                    | 0.071   | 8.50 [7.00;10.32]                   | <0.001  |
|                             | Transport (e.g. bus/taxi-driver)  | 0.98 [0.63;1.54]                    | 0.938   | 1.50 [0.93; 2.41]                   | 0.0926  |
|                             | Outdoors (e.g. gardener)          | 1.20 [0.92;1.57]                    | 0.186   | 1.47 [1.12; 1.91]                   | 0.0048  |
|                             | Other                             | 1.20 [1.01;1.42]                    | 0.038   | 1.91 [1.61; 2.27]                   | <0.001  |
| Contact to people at work   | No contact                        | Ref                                 | Ref     | Ref                                 | Ref     |
|                             | Yes, close                        | 1.14 [1.04;1.25]                    | 0.0065  | 3.02 [2.72;3.36]                    | <0.001  |
|                             | Yes, other                        | 1.09 [1.00;1.20]                    | 0.0504  | 1.29 [1.17;1.41]                    | <0.001  |
|                             | Non-employed                      | 0.84 [0.74;0.96]                    | 0.0103  | 0.55 [0.48;0.63]                    | <0.001  |
| Education level             | ISCED 0                           | Ref                                 | Ref     | Ref                                 | Ref     |
|                             | ISCED 1                           | 1.02 [0.91;1.16]                    | 0.7     | 1.36 [1.20;1.53]                    | <0.001  |
|                             | ISCED 2                           | 1.09 [0.96;1.24]                    | 0.17    | 1.74 [1.53;1.97]                    | <0.001  |
|                             | ISCED 3&4                         | 0.95 [0.83;1.10]                    | 0.51    | 1.38 [1.20;1.59]                    | <0.001  |
| Income                      | 1st quartile                      | Ref                                 | Ref     | Ref                                 | Ref     |
|                             | 2nd quartile                      | 0.93 [0.84;1.02]                    | 0.11    | 1.05 [0.96;1.16]                    | 0.28    |
|                             | 3rd quartile                      | 1.03 [0.92;1.14]                    | 0.63    | 1.22 [1.10;1.36]                    | <0.001  |
|                             | 4th quartile                      | 0.98 [0.88;1.09]                    | 0.71    | 1.20 [1.08;1.34]                    | <0.001  |

| Ethnicity | Danish | Ref              | Ref    | Ref              | Ref    |
|-----------|--------|------------------|--------|------------------|--------|
|           | Other  | 1.27 [1.14;1.40] | <0.001 | 3.22 [2.85;3.64] | <0.001 |

**eTable 13. Subgroup Analysis of Household Size: 3-4 Members**

| Questions                            | Options                    | Cases compared to negative controls |         | Cases compared to untested controls |         |
|--------------------------------------|----------------------------|-------------------------------------|---------|-------------------------------------|---------|
|                                      |                            | Rate Ratio [CI]                     | P-value | Rate Ratio [CI]                     | P-value |
| Contact w/ SARS-Cov-2 positive       | None                       | Ref                                 | Ref     | Ref                                 | Ref     |
|                                      | Other                      | 1.77 [1.57;2.00]                    | <0.001  | 12.79 [10.62;15.39]                 | <0.001  |
| Daily contacts                       | Close (<2 meter, >30 min.) | 2.81 [2.51;3.15]                    | <0.001  | 28.68 [23.17;35.49]                 | <0.001  |
|                                      | <10                        | Ref                                 | Ref     | Ref                                 | Ref     |
|                                      | 10 to 50                   | 1.04 [0.94;1.15]                    | 0.4353  | 1.85 [1.66;2.07]                    | <0.001  |
| Bus travel                           | >50                        | 1.36 [1.11;1.68]                    | 0.0038  | 1.87 [1.49;2.35]                    | <0.001  |
|                                      | No                         | Ref                                 | Ref     | Ref                                 | Ref     |
| Train travel                         | Yes                        | 0.76 [0.67;0.86]                    | <0.001  | 0.91 [0.80;1.05]                    | 0.19    |
|                                      | No                         | Ref                                 | Ref     | Ref                                 | Ref     |
| Ferry travel                         | Yes                        | 0.83 [0.74;0.92]                    | <0.001  | 0.93 [0.83;1.04]                    | 0.23    |
|                                      | No                         | Ref                                 | Ref     | Ref                                 | Ref     |
| Airplane travel                      | Yes                        | 0.82 [0.63;1.06]                    | 0.12    | 0.80 [0.62;1.04]                    | 0.093   |
|                                      | No                         | Ref                                 | Ref     | Ref                                 | Ref     |
| Indoor sports                        | Yes                        | 1.03 [0.70;1.52]                    | 0.87    | 1.56 [1.01;2.41]                    | 0.044   |
|                                      | No                         | Ref                                 | Ref     | Ref                                 | Ref     |
| Outdoor sports                       | Yes                        | 1.20 [1.07;1.35]                    | 0.0015  | 1.40 [1.23;1.58]                    | <0.001  |
|                                      | No                         | Ref                                 | Ref     | Ref                                 | Ref     |
| Visiting a gym                       | Yes                        | 0.73 [0.63;0.84]                    | <0.001  | 0.87 [0.75;1.02]                    | 0.079   |
|                                      | No                         | Ref                                 | Ref     | Ref                                 | Ref     |
| Use of public swimming pool or sauna | Yes                        | 1.29 [1.15;1.45]                    | <0.001  | 1.60 [1.41;1.82]                    | <0.001  |
|                                      | No                         | Ref                                 | Ref     | Ref                                 | Ref     |
| Grocery shopping                     | Yes                        | 0.77 [0.65;0.93]                    | 0.0062  | 0.93 [0.77;1.13]                    | 0.49    |
|                                      | No                         | Ref                                 | Ref     | Ref                                 | Ref     |
| Restaurants/cafés                    | Yes                        | 0.55 [0.43;0.69]                    | <0.001  | 0.62 [0.49;0.80]                    | <0.001  |
|                                      | No                         | Ref                                 | Ref     | Ref                                 | Ref     |
| Bar                                  | Yes                        | 1.06 [0.96;1.17]                    | 0.24    | 1.18 [1.06;1.31]                    | 0.002   |
|                                      | No                         | Ref                                 | Ref     | Ref                                 | Ref     |
| Wearing a mask                       | Yes                        | 1.38 [1.20;1.59]                    | <0.001  | 1.69 [1.45;1.97]                    | <0.001  |
|                                      | No                         | Ref                                 | Ref     | Ref                                 | Ref     |
| Frequent handwashing                 | Yes                        | 0.88 [0.50;1.57]                    | 0.67    | 1.19 [0.68;2.10]                    | 0.54    |
|                                      | No                         | Ref                                 | Ref     | Ref                                 | Ref     |
| Frequent hand sanitizer use          | Yes                        | 1.06 [0.94;1.20]                    | 0.33    | 1.22 [1.08;1.39]                    | 0.0021  |
|                                      | No                         | Ref                                 | Ref     | Ref                                 | Ref     |
| Sneezing in elbow                    | Yes                        | 0.72 [0.62;0.82]                    | <0.001  | 0.82 [0.71;0.95]                    | 0.0073  |
|                                      | No                         | Ref                                 | Ref     | Ref                                 | Ref     |
| Avoiding handshakes                  | Yes                        | 0.91 [0.80;1.03]                    | 0.12    | 0.99 [0.87;1.13]                    | 0.89    |
|                                      | No                         | Ref                                 | Ref     | Ref                                 | Ref     |
| Avoiding hugs                        | Yes                        | 0.66 [0.58;0.75]                    | <0.001  | 0.66 [0.58;0.76]                    | <0.001  |
|                                      | No                         | Ref                                 | Ref     | Ref                                 | Ref     |
| Physical distancing                  | Yes                        | 0.79 [0.71;0.88]                    | <0.001  | 0.90 [0.81;1.01]                    | 0.066   |
|                                      | No                         | Ref                                 | Ref     | Ref                                 | Ref     |
| Limiting public transport            | Yes                        | 0.76 [0.68;0.86]                    | <0.001  | 0.78 [0.69;0.88]                    | <0.001  |
|                                      | No                         | Ref                                 | Ref     | Ref                                 | Ref     |
| Avoiding social events               | Yes                        | 0.98 [0.89;1.08]                    | 0.74    | 1.00 [0.91;1.11]                    | 0.96    |
|                                      | No                         | Ref                                 | Ref     | Ref                                 | Ref     |
| Staying more at home                 | Yes                        | 0.76 [0.69;0.83]                    | <0.001  | 0.77 [0.70;0.86]                    | <0.001  |
|                                      | No                         | Ref                                 | Ref     | Ref                                 | Ref     |
|                                      | Yes                        | 0.68 [0.62;0.75]                    | <0.001  | 0.56 [0.51;0.62]                    | <0.001  |

**eTable 13. Subgroup Analysis of Household Size: 3-4 Members (continued)**

| Questions                   | Options                           | Cases compared to negative controls |         | Cases compared to untested controls |         |
|-----------------------------|-----------------------------------|-------------------------------------|---------|-------------------------------------|---------|
|                             |                                   | Rate Ratio [CI]                     | P-value | Rate Ratio [CI]                     | P-value |
| Avoiding crowds             | No                                | Ref                                 | Ref     | Ref                                 | Ref     |
|                             | Yes                               | 0.85 [0.78;0.94]                    | <0.001  | 0.90 [0.81;0.99]                    | 0.031   |
| Avoiding sports with others | No                                | Ref                                 | Ref     | Ref                                 | Ref     |
|                             | Yes                               | 0.92 [0.84;1.01]                    | 0.078   | 0.86 [0.78;0.94]                    | 0.0013  |
| Limiting traveling          | No                                | Ref                                 | Ref     | Ref                                 | Ref     |
|                             | Yes                               | 0.91 [0.82;1.01]                    | 0.091   | 0.85 [0.76;0.95]                    | 0.0055  |
| Limiting grocery shopping   | No                                | Ref                                 | Ref     | Ref                                 | Ref     |
|                             | Yes                               | 1.11 [1.01;1.22]                    | 0.029   | 1.05 [0.95;1.15]                    | 0.38    |
| Attending large event       | No                                | Ref                                 | Ref     | Ref                                 | Ref     |
|                             | Yes, >30                          | 1.46 [1.20;1.77]                    | <0.001  | 2.06 [1.64;2.57]                    | <0.001  |
|                             | Yes, >50                          | 1.76 [1.44;2.16]                    | <0.001  | 1.89 [1.52;2.36]                    | <0.001  |
| Indoor/outdoor event        | No                                | Ref                                 | Ref     | Ref                                 | Ref     |
|                             | Indoor                            | 1.64 [1.41;1.91]                    | <0.001  | 2.08 [1.76;2.47]                    | <0.001  |
|                             | Outdoor                           | 1.04 [0.63;1.72]                    | 0.88    | 1.11 [0.66;1.88]                    | 0.69    |
| Primary employment          | Non-employed                      | Ref                                 | Ref     | Ref                                 | Ref     |
|                             | Student                           | 1.45 [1.01;2.06]                    | 0.0421  | 2.56 [1.80;3.66]                    | <0.001  |
|                             | Public employee                   | 1.45 [1.07;1.97]                    | 0.0161  | 3.47 [2.54;4.72]                    | <0.001  |
|                             | Private employee                  | 1.23 [0.91;1.67]                    | 0.1828  | 1.58 [1.16;2.15]                    | 0.0034  |
|                             | Self employed                     | 1.66 [1.18;2.33]                    | 0.0037  | 1.81 [1.28;2.55]                    | <0.001  |
|                             | Other                             | 1.50 [0.99;2.27]                    | 0.0558  | 1.36 [0.89;2.06]                    | 0.1532  |
| Type of occupation          | Non-employed                      | Ref                                 | Ref     | Ref                                 | Ref     |
|                             | At home                           | 0.93 [0.72;1.20]                    | 0.5732  | 1.20 [0.92;1.55]                    | 0.1728  |
|                             | Own office                        | 1.02 [0.76;1.36]                    | 0.9005  | 1.70 [1.26;2.29]                    | <0.001  |
|                             | Shared office                     | 1.28 [0.99;1.66]                    | 0.062   | 1.89 [1.44;2.47]                    | <0.001  |
|                             | Retail, library or factory worker | 1.45 [1.08;1.93]                    | 0.0133  | 1.61 [1.19;2.17]                    | 0.0019  |
|                             | Social care or education          | 1.52 [1.18;1.95]                    | 0.0012  | 5.41 [4.14;7.08]                    | <0.001  |
|                             | Healthcare sector                 | 1.29 [0.98;1.71]                    | 0.0711  | 6.88 [5.01;9.44]                    | <0.001  |
|                             | Transport (e.g. bus/taxi-driver)  | 1.89 [1.07;3.34]                    | 0.028   | 3.38 [1.73;6.60]                    | <0.001  |
|                             | Outdoors (e.g. gardener)          | 0.92 [0.61;1.39]                    | 0.6955  | 1.23 [0.81;1.87]                    | 0.329   |
|                             | Other                             | 1.31 [0.98;1.75]                    | 0.0674  | 1.82 [1.35;2.46]                    | <0.001  |
| Contact to people at work   | No contact                        | Ref                                 | Ref     | Ref                                 | Ref     |
|                             | Yes, close                        | 1.46 [1.29;1.66]                    | <0.001  | 3.30 [2.87;3.80]                    | <0.001  |
|                             | Yes, other                        | 1.21 [1.07;1.36]                    | 0.0018  | 1.44 [1.27;1.64]                    | <0.001  |
| Education level             | Non-employed                      | 1.07 [0.85;1.34]                    | 0.5659  | 0.78 [0.62;0.98]                    | 0.031   |
|                             | ISCED 0                           | Ref                                 | Ref     | Ref                                 | Ref     |
|                             | ISCED 1                           | 1.04 [0.85;1.26]                    | 0.73    | 1.15 [0.94;1.40]                    | 0.19    |
|                             | ISCED 2                           | 1.01 [0.82;1.24]                    | 0.92    | 1.45 [1.17;1.80]                    | <0.001  |
| Income                      | ISCED 3&4                         | 0.84 [0.68;1.04]                    | 0.11    | 0.99 [0.80;1.23]                    | 0.95    |
|                             | 1st quartile                      | Ref                                 | Ref     | Ref                                 | Ref     |
|                             | 2nd quartile                      | 0.77 [0.67;0.90]                    | <0.001  | 0.82 [0.70;0.96]                    | 0.0162  |
|                             | 3rd quartile                      | 0.76 [0.66;0.88]                    | <0.001  | 0.80 [0.69;0.94]                    | 0.0058  |
| Ethnicity                   | 4th quartile                      | 0.76 [0.65;0.88]                    | <0.001  | 0.74 [0.63;0.87]                    | <0.001  |
|                             | Danish                            | Ref                                 | Ref     | Ref                                 | Ref     |
|                             | Other                             | 1.25 [1.10;1.43]                    | <0.001  | 2.42 [2.06;2.85]                    | <0.001  |

**eTable 14. Subgroup Analysis of Household Size: >5 Members**

| Questions                            | Options                    | Cases compared to negative controls |         | Cases compared to untested controls |         |
|--------------------------------------|----------------------------|-------------------------------------|---------|-------------------------------------|---------|
|                                      |                            | Rate Ratio [CI]                     | P-value | Rate Ratio [CI]                     | P-value |
| Contact w/ SARS-Cov-2 positive       | None                       | Ref                                 | Ref     | Ref                                 | Ref     |
|                                      | Other                      | 1.87 [1.31;2.65]                    | <0.001  | 16.24 [ 8.45; 31.22]                | <0.001  |
| Daily contacts                       | Close (<2 meter, >30 min.) | 3.12 [2.22;4.38]                    | <0.001  | 45.34 [20.37;100.93]                | <0.001  |
|                                      | <10                        | Ref                                 | Ref     | Ref                                 | Ref     |
|                                      | 10 to 50                   | 0.99 [0.73;1.35]                    | 0.95    | 1.60 [1.13;2.25]                    | 0.0074  |
| Bus travel                           | >50                        | 0.89 [0.49;1.62]                    | 0.7     | 1.24 [0.63;2.45]                    | 0.5343  |
|                                      | No                         | Ref                                 | Ref     | Ref                                 | Ref     |
| Train travel                         | Yes                        | 0.72 [0.50;1.03]                    | 0.073   | 1.29 [0.85;1.95]                    | 0.23    |
|                                      | No                         | Ref                                 | Ref     | Ref                                 | Ref     |
| Ferry travel                         | Yes                        | 0.66 [0.49;0.90]                    | 0.008   | 0.98 [0.70;1.39]                    | 0.93    |
|                                      | No                         | Ref                                 | Ref     | Ref                                 | Ref     |
| Airplane travel                      | Yes                        | 0.41 [0.15;1.17]                    | 0.095   | 0.23 [0.051;1.07]                   | 0.062   |
|                                      | No                         | Ref                                 | Ref     | Ref                                 | Ref     |
| Indoor sports                        | Yes                        | 0.57 [0.17;1.89]                    | 0.36    | 2.39 [0.37;15.23]                   | 0.36    |
|                                      | No                         | Ref                                 | Ref     | Ref                                 | Ref     |
| Outdoor sports                       | Yes                        | 1.11 [0.80;1.54]                    | 0.52    | 1.29 [0.87;1.90]                    | 0.2     |
|                                      | No                         | Ref                                 | Ref     | Ref                                 | Ref     |
| Visiting a gym                       | Yes                        | 0.61 [0.41;0.91]                    | 0.015   | 0.79 [0.51;1.21]                    | 0.28    |
|                                      | No                         | Ref                                 | Ref     | Ref                                 | Ref     |
| Use of public swimming pool or sauna | Yes                        | 1.14 [0.81;1.61]                    | 0.46    | 1.43 [0.98;2.09]                    | 0.067   |
|                                      | No                         | Ref                                 | Ref     | Ref                                 | Ref     |
| Grocery shopping                     | Yes                        | 0.67 [0.40;1.10]                    | 0.11    | 0.75 [0.44;1.29]                    | 0.3     |
|                                      | No                         | Ref                                 | Ref     | Ref                                 | Ref     |
| Restaurants/café                     | Yes                        | 0.38 [0.21;0.70]                    | 0.0019  | 0.33 [0.15;0.72]                    | 0.0056  |
|                                      | No                         | Ref                                 | Ref     | Ref                                 | Ref     |
| Bar                                  | Yes                        | 1.00 [0.75;1.34]                    | 0.99    | 1.23 [0.91;1.67]                    | 0.18    |
|                                      | No                         | Ref                                 | Ref     | Ref                                 | Ref     |
| Wearing a mask                       | Yes                        | 0.95 [0.63;1.42]                    | 0.79    | 1.42 [0.88;2.29]                    | 0.15    |
|                                      | No                         | Ref                                 | Ref     | Ref                                 | Ref     |
| Frequent handwashing                 | Yes                        | 0.72 [0.11;4.87]                    | 0.74    | 1.77 [0.31;10.18]                   | 0.52    |
|                                      | No                         | Ref                                 | Ref     | Ref                                 | Ref     |
| Frequent hand sanitizer use          | Yes                        | 0.84 [0.63;1.12]                    | 0.24    | 1.05 [0.74;1.48]                    | 0.8     |
|                                      | No                         | Ref                                 | Ref     | Ref                                 | Ref     |
| Sneezing in elbow                    | Yes                        | 0.50 [0.36;0.71]                    | <0.001  | 0.66 [0.44;0.98]                    | 0.04    |
|                                      | No                         | Ref                                 | Ref     | Ref                                 | Ref     |
| Avoiding handshakes                  | Yes                        | 0.81 [0.60;1.10]                    | 0.17    | 1.06 [0.74;1.51]                    | 0.76    |
|                                      | No                         | Ref                                 | Ref     | Ref                                 | Ref     |
| Avoiding hugs                        | Yes                        | 0.50 [0.36;0.69]                    | <0.001  | 0.55 [0.38;0.80]                    | 0.0018  |
|                                      | No                         | Ref                                 | Ref     | Ref                                 | Ref     |
| Physical distancing                  | Yes                        | 0.62 [0.47;0.83]                    | <0.001  | 0.85 [0.62;1.16]                    | 0.3     |
|                                      | No                         | Ref                                 | Ref     | Ref                                 | Ref     |
| Limiting public transport            | Yes                        | 0.57 [0.42;0.78]                    | <0.001  | 0.65 [0.46;0.92]                    | 0.016   |
|                                      | No                         | Ref                                 | Ref     | Ref                                 | Ref     |
| Avoiding social events               | Yes                        | 0.90 [0.70;1.15]                    | 0.41    | 1.00 [0.74;1.34]                    | 0.98    |
|                                      | No                         | Ref                                 | Ref     | Ref                                 | Ref     |
| Staying more at home                 | Yes                        | 0.63 [0.49;0.83]                    | <0.001  | 0.58 [0.43;0.79]                    | <0.001  |
|                                      | No                         | Ref                                 | Ref     | Ref                                 | Ref     |
|                                      | Yes                        | 0.70 [0.54;0.90]                    | 0.0055  | 0.50 [0.37;0.67]                    | <0.001  |



**eTable 14. Subgroup Analysis of Household Size: >5 Members (continued)**

| Questions                   | Options                           | Cases compared to negative controls |         | Cases compared to untested controls |         |
|-----------------------------|-----------------------------------|-------------------------------------|---------|-------------------------------------|---------|
|                             |                                   | Rate Ratio [CI]                     | P-value | Rate Ratio [CI]                     | P-value |
| Avoiding crowds             | No                                | Ref                                 | Ref     | Ref                                 | Ref     |
|                             | Yes                               | 0.72 [0.56;0.92]                    | 0.008   | 0.85 [0.64;1.13]                    | 0.26    |
| Avoiding sports with others | No                                | Ref                                 | Ref     | Ref                                 | Ref     |
|                             | Yes                               | 0.84 [0.66;1.09]                    | 0.19    | 0.70 [0.52;0.93]                    | 0.014   |
| Limiting traveling          | No                                | Ref                                 | Ref     | Ref                                 | Ref     |
|                             | Yes                               | 0.76 [0.58;1.00]                    | 0.053   | 0.75 [0.54;1.03]                    | 0.073   |
| Limiting grocery shopping   | No                                | Ref                                 | Ref     | Ref                                 | Ref     |
|                             | Yes                               | 1.02 [0.78;1.32]                    | 0.9     | 1.28 [0.94;1.75]                    | 0.12    |
| Attending large event       | No                                | Ref                                 | Ref     | Ref                                 | Ref     |
|                             | Yes, >30                          | 1.11 [0.63;1.94]                    | 0.72    | 2.05 [1.05;4.01]                    | 0.035   |
|                             | Yes, >50                          | 0.89 [0.49;1.62]                    | 0.71    | 1.78 [0.85;3.72]                    | 0.125   |
| Indoor/outdoor event        | No                                | Ref                                 | Ref     | Ref                                 | Ref     |
|                             | Indoor                            | 0.94 [0.61; 1.46]                   | 0.79    | 2.30 [1.29;4.09]                    | 0.0047  |
|                             | Outdoor                           | 2.28 [0.49;10.60]                   | 0.29    | 0.63 [0.15;2.66]                    | 0.5258  |
| Primary employment          | Non-employed                      | Ref                                 | Ref     | Ref                                 | Ref     |
|                             | Student                           | 0.24 [0.086;0.69]                   | 0.0077  | 1.98 [0.72;5.44]                    | 0.186   |
|                             | Public employee                   | 0.27 [0.106;0.69]                   | 0.006   | 2.55 [1.08;5.99]                    | 0.032   |
|                             | Private employee                  | 0.29 [0.113;0.74]                   | 0.0098  | 1.15 [0.49;2.68]                    | 0.751   |
|                             | Self employed                     | 0.31 [0.107;0.88]                   | 0.0274  | 1.05 [0.39;2.82]                    | 0.929   |
|                             | Other                             | 0.15 [0.034;0.61]                   | 0.0088  | 1.06 [0.25;4.55]                    | 0.936   |
| Type of occupation          | Non-employed                      | Ref                                 | Ref     | Ref                                 | Ref     |
|                             | At home                           | 0.38 [0.18;0.77]                    | 0.0079  | 1.23 [0.55; 2.76]                   | 0.621   |
|                             | Own office                        | 0.73 [0.33;1.62]                    | 0.4331  | 2.80 [1.16; 6.78]                   | 0.022   |
|                             | Shared office                     | 0.69 [0.33;1.44]                    | 0.3185  | 1.86 [0.82; 4.24]                   | 0.137   |
|                             | Retail, library or factory worker | 0.70 [0.30;1.62]                    | 0.4062  | 1.35 [0.53; 3.45]                   | 0.526   |
|                             | Social care or education          | 0.74 [0.37;1.48]                    | 0.3953  | 4.70 [2.09;10.58]                   | <0.001  |
|                             | Healthcare sector                 | 0.40 [0.18;0.86]                    | 0.0198  | 5.52 [2.16;14.10]                   | <0.001  |
|                             | Transport (e.g. bus/taxi-driver)  | 0.79 [0.18;3.37]                    | 0.7495  | 4.83 [0.71;32.98]                   | 0.108   |
|                             | Outdoors (e.g. gardener)          | 1.27 [0.39;4.17]                    | 0.6932  | 5.25 [1.25;22.07]                   | 0.024   |
| Contact to people at work   | Other                             | 0.58 [0.25;1.33]                    | 0.1986  | 2.36 [0.95; 5.86]                   | 0.066   |
|                             | No contact                        | Ref                                 | Ref     | Ref                                 | Ref     |
|                             | Yes, close                        | 1.49 [1.03;2.14]                    | 0.032   | 3.22 [2.12;4.88]                    | <0.001  |
|                             | Yes, other                        | 1.21 [0.85;1.72]                    | 0.288   | 1.27 [0.86;1.88]                    | 0.23    |
| Education level             | Non-employed                      | 1.80 [0.94;3.43]                    | 0.075   | 0.72 [0.36;1.45]                    | 0.36    |
|                             | ISCED 0                           | Ref                                 | Ref     | Ref                                 | Ref     |
|                             | ISCED 1                           | 0.70 [0.40;1.22]                    | 0.208   | 0.63 [0.31;1.27]                    | 0.2     |
|                             | ISCED 2                           | 0.53 [0.30;0.93]                    | 0.028   | 0.77 [0.38;1.55]                    | 0.466   |
|                             | ISCED 3&4                         | 0.51 [0.29;0.90]                    | 0.021   | 0.43 [0.21;0.87]                    | 0.018   |
| Income                      | 1st quartile                      | Ref                                 | Ref     | Ref                                 | Ref     |
|                             | 2nd quartile                      | 0.64 [0.45;0.93]                    | 0.0185  | 0.82 [0.55;1.23]                    | 0.33    |
|                             | 3rd quartile                      | 0.63 [0.44;0.90]                    | 0.011   | 0.71 [0.47;1.07]                    | 0.1     |
|                             | 4th quartile                      | 0.48 [0.31;0.75]                    | 0.0011  | 0.39 [0.24;0.63]                    | <0.001  |
| Ethnicity                   | Danish                            | Ref                                 | Ref     | Ref                                 | Ref     |
|                             | Other                             | 2.04 [1.49;2.81]                    | <0.001  | 3.06 [2.03;4.62]                    | <0.001  |

**eTable 15. Subgroup Analysis of Ethnicity (Danish)**

| Questions                            | Options                    | Cases compared to negative controls |         | Cases compared to untested controls |         |
|--------------------------------------|----------------------------|-------------------------------------|---------|-------------------------------------|---------|
|                                      |                            | Rate Ratio [CI]                     | P-value | Rate Ratio [CI]                     | P-value |
| Contact w/ SARS-Cov-2 positive       | None                       | Ref                                 | Ref     | Ref                                 | Ref     |
|                                      | Other                      | 1.87 [1.74;2.00]                    | <0.001  | 14.41 [12.99;15.99]                 | <0.001  |
| Daily contacts                       | Close (<2 meter, >30 min.) | 3.11 [2.91;3.33]                    | <0.001  | 35.48 [31.49;39.99]                 | <0.001  |
|                                      | <10                        | Ref                                 | Ref     | Ref                                 | Ref     |
|                                      | 10 to 50                   | 1.09 [1.03;1.16]                    | 0.0041  | 1.91 [1.80;2.04]                    | <0.001  |
|                                      | >50                        | 1.21 [1.07;1.38]                    | 0.0026  | 1.75 [1.53;2.00]                    | <0.001  |
| Bus travel                           | No                         | Ref                                 | Ref     | Ref                                 | Ref     |
|                                      | Yes                        | 0.82 [0.77;0.88]                    | <0.001  | 0.86 [0.80;0.92]                    | <0.001  |
| Train travel                         | No                         | Ref                                 | Ref     | Ref                                 | Ref     |
|                                      | Yes                        | 0.87 [0.82;0.93]                    | <0.001  | 0.99 [0.93;1.05]                    | 0.74    |
| Ferry travel                         | No                         | Ref                                 | Ref     | Ref                                 | Ref     |
|                                      | Yes                        | 0.79 [0.69;0.91]                    | <0.001  | 0.85 [0.73;0.98]                    | 0.023   |
| Airplane travel                      | No                         | Ref                                 | Ref     | Ref                                 | Ref     |
|                                      | Yes                        | 0.74 [0.59;0.93]                    | 0.0083  | 1.17 [0.92;1.48]                    | 0.2     |
| Indoor sports                        | No                         | Ref                                 | Ref     | Ref                                 | Ref     |
|                                      | Yes                        | 1.20 [1.12;1.28]                    | <0.001  | 1.59 [1.49;1.71]                    | <0.001  |
| Outdoor sports                       | No                         | Ref                                 | Ref     | Ref                                 | Ref     |
|                                      | Yes                        | 0.79 [0.72;0.86]                    | <0.001  | 0.99 [0.91;1.09]                    | 0.85    |
| Visiting a gym                       | No                         | Ref                                 | Ref     | Ref                                 | Ref     |
|                                      | Yes                        | 1.29 [1.20;1.38]                    | <0.001  | 1.61 [1.50;1.73]                    | <0.001  |
| Use of public swimming pool or sauna | No                         | Ref                                 | Ref     | Ref                                 | Ref     |
|                                      | Yes                        | 0.91 [0.82;1.01]                    | 0.089   | 1.11 [0.99;1.24]                    | 0.065   |
| Grocery shopping                     | No                         | Ref                                 | Ref     | Ref                                 | Ref     |
|                                      | Yes                        | 0.63 [0.55;0.73]                    | <0.001  | 0.79 [0.68;0.91]                    | 0.0016  |
| Restaurants/cafés                    | No                         | Ref                                 | Ref     | Ref                                 | Ref     |
|                                      | Yes                        | 1.08 [1.02;1.15]                    | 0.0076  | 1.43 [1.34;1.51]                    | <0.001  |
| Bar                                  | No                         | Ref                                 | Ref     | Ref                                 | Ref     |
|                                      | Yes                        | 1.28 [1.19;1.38]                    | <0.001  | 1.65 [1.52;1.78]                    | <0.001  |
| Wearing a mask                       | No                         | Ref                                 | Ref     | Ref                                 | Ref     |
|                                      | Yes                        | 1.31 [0.88;1.94]                    | 0.18    | 2.23 [1.51;3.30]                    | <0.001  |
| Frequent handwashing                 | No                         | Ref                                 | Ref     | Ref                                 | Ref     |
|                                      | Yes                        | 1.23 [1.14;1.33]                    | <0.001  | 1.49 [1.37;1.61]                    | <0.001  |
| Frequent hand sanitizer use          | No                         | Ref                                 | Ref     | Ref                                 | Ref     |
|                                      | Yes                        | 0.86 [0.79;0.93]                    | <0.001  | 1.15 [1.05;1.26]                    | 0.002   |
| Sneezing in elbow                    | No                         | Ref                                 | Ref     | Ref                                 | Ref     |
|                                      | Yes                        | 1.10 [1.02;1.19]                    | 0.011   | 1.39 [1.28;1.50]                    | <0.001  |
| Avoiding handshakes                  | No                         | Ref                                 | Ref     | Ref                                 | Ref     |
|                                      | Yes                        | 0.81 [0.75;0.87]                    | <0.001  | 0.87 [0.81;0.95]                    | 0.0012  |
| Avoiding hugs                        | No                         | Ref                                 | Ref     | Ref                                 | Ref     |
|                                      | Yes                        | 0.95 [0.89;1.01]                    | 0.088   | 1.03 [0.96;1.10]                    | 0.4     |
| Physical distancing                  | No                         | Ref                                 | Ref     | Ref                                 | Ref     |
|                                      | Yes                        | 0.87 [0.81;0.94]                    | <0.001  | 0.93 [0.86;1.00]                    | 0.064   |
| Limiting public transport            | No                         | Ref                                 | Ref     | Ref                                 | Ref     |
|                                      | Yes                        | 1.08 [1.02;1.14]                    | 0.0098  | 1.08 [1.02;1.15]                    | 0.0067  |
| Avoiding social events               | No                         | Ref                                 | Ref     | Ref                                 | Ref     |
|                                      | Yes                        | 0.90 [0.85;0.95]                    | <0.001  | 0.92 [0.87;0.98]                    | 0.0076  |
| Staying more at home                 | No                         | Ref                                 | Ref     | Ref                                 | Ref     |
|                                      | Yes                        | 0.79 [0.75;0.83]                    | <0.001  | 0.73 [0.69;0.77]                    | <0.001  |

**eTable 15. Subgroup Analysis of Ethnicity (Danish) (continued)**

| Questions                   | Options                           | Cases compared to negative controls |         | Cases compared to untested controls |         |
|-----------------------------|-----------------------------------|-------------------------------------|---------|-------------------------------------|---------|
|                             |                                   | Rate Ratio [CI]                     | P-value | Rate Ratio [CI]                     | P-value |
| Avoiding crowds             | No                                | Ref                                 | Ref     | Ref                                 | Ref     |
|                             | Yes                               | 0.93 [0.88;0.98]                    | 0.0078  | 0.93 [0.88;0.99]                    | 0.015   |
| Avoiding sports with others | No                                | Ref                                 | Ref     | Ref                                 | Ref     |
|                             | Yes                               | 0.90 [0.86;0.95]                    | <0.001  | 0.82 [0.78;0.87]                    | <0.001  |
| Limiting traveling          | No                                | Ref                                 | Ref     | Ref                                 | Ref     |
|                             | Yes                               | 1.03 [0.97;1.10]                    | 0.28    | 0.99 [0.92;1.05]                    | 0.67    |
| Limiting grocery shopping   | No                                | Ref                                 | Ref     | Ref                                 | Ref     |
|                             | Yes                               | 1.10 [1.04;1.16]                    | <0.001  | 1.08 [1.02;1.14]                    | 0.01    |
| Attending large event       | No                                | Ref                                 | Ref     | Ref                                 | Ref     |
|                             | Yes, >30                          | 1.54 [1.38;1.73]                    | <0.001  | 2.22 [1.96;2.51]                    | <0.001  |
|                             | Yes, >50                          | 1.74 [1.55;1.95]                    | <0.001  | 2.23 [1.97;2.52]                    | <0.001  |
| Indoor/outdoor event        | No                                | Ref                                 | Ref     | Ref                                 | Ref     |
|                             | Indoor                            | 1.66 [1.52;1.81]                    | <0.001  | 2.36 [2.15;2.59]                    | <0.001  |
|                             | Outdoor                           | 1.35 [1.03;1.77]                    | 0.031   | 1.32 [1.00;1.74]                    | 0.05    |
| Primary employment          | Non-employed                      | Ref                                 | Ref     | Ref                                 | Ref     |
|                             | Student                           | 1.24 [1.06;1.45]                    | 0.0079  | 2.98 [2.54;3.50]                    | <0.001  |
|                             | Public employee                   | 1.39 [1.22;1.59]                    | <0.001  | 4.77 [4.18;5.44]                    | <0.001  |
|                             | Private employee                  | 1.31 [1.15;1.50]                    | <0.001  | 2.27 [1.99;2.58]                    | <0.001  |
|                             | Self employed                     | 1.43 [1.22;1.68]                    | <0.001  | 2.22 [1.89;2.60]                    | <0.001  |
|                             | Other                             | 0.97 [0.81;1.17]                    | 0.7688  | 1.32 [1.10;1.59]                    | 0.0032  |
| Type of occupation          | Non-employed                      | Ref                                 | Ref     | Ref                                 | Ref     |
|                             | At home                           | 0.99 [0.88;1.13]                    | 0.923   | 1.55 [1.37; 1.76]                   | <0.001  |
|                             | Own office                        | 1.31 [1.13;1.52]                    | <0.001  | 2.42 [2.09; 2.82]                   | <0.001  |
|                             | Shared office                     | 1.45 [1.27;1.65]                    | <0.001  | 2.45 [2.15; 2.79]                   | <0.001  |
|                             | Retail, library or factory worker | 1.48 [1.26;1.72]                    | <0.001  | 1.80 [1.54; 2.10]                   | <0.001  |
|                             | Social care or education          | 1.61 [1.42;1.83]                    | <0.001  | 6.88 [6.01; 7.87]                   | <0.001  |
|                             | Healthcare sector                 | 1.27 [1.10;1.46]                    | <0.001  | 8.75 [7.45;10.28]                   | <0.001  |
|                             | Transport (e.g. bus/taxi-driver)  | 0.83 [0.55;1.27]                    | 0.397   | 1.18 [0.76; 1.83]                   | 0.47    |
|                             | Outdoors (e.g. gardener)          | 1.26 [1.02;1.56]                    | 0.032   | 1.47 [1.19; 1.82]                   | <0.001  |
|                             | Other                             | 1.32 [1.13;1.52]                    | <0.001  | 2.00 [1.73; 2.32]                   | <0.001  |
| Contact to people at work   | No contact                        | Ref                                 | Ref     | Ref                                 | Ref     |
|                             | Yes, close                        | 1.24 [1.15;1.33]                    | <0.001  | 3.05 [2.81;3.31]                    | <0.001  |
|                             | Yes, other                        | 1.11 [1.04;1.20]                    | 0.0026  | 1.33 [1.23;1.43]                    | <0.001  |
| Household size              | Non-employed                      | 0.85 [0.75;0.95]                    | 0.0039  | 0.58 [0.51;0.64]                    | <0.001  |
|                             | 1 to 2 persons                    | Ref                                 | Ref     | Ref                                 | Ref     |
|                             | 3 to 4 persons                    | 0.97 [0.90;1.03]                    | 0.33    | 1.31 [1.22;1.40]                    | <0.001  |
| Education level             | >5 persons                        | 1.08 [0.96;1.22]                    | 0.21    | 1.77 [1.56;2.02]                    | <0.001  |
|                             | ISCED 0                           | Ref                                 | Ref     | Ref                                 | Ref     |
|                             | ISCED 1                           | 1.05 [0.95;1.17]                    | 0.322   | 1.35 [1.22;1.50]                    | <0.001  |
|                             | ISCED 2                           | 1.13 [1.01;1.26]                    | 0.029   | 1.81 [1.62;2.02]                    | <0.001  |
| Income                      | ISCED 3&4                         | 0.94 [0.83;1.05]                    | 0.285   | 1.31 [1.17;1.48]                    | <0.001  |
|                             | 1st quartile                      | Ref                                 | Ref     | Ref                                 | Ref     |
|                             | 2nd quartile                      | 0.95 [0.88;1.03]                    | 0.23    | 1.16 [1.07;1.26]                    | <0.001  |
|                             | 3rd quartile                      | 1.01 [0.93;1.10]                    | 0.75    | 1.28 [1.18;1.39]                    | <0.001  |
|                             | 4th quartile                      | 1.00 [0.91;1.09]                    | 0.94    | 1.20 [1.10;1.31]                    | <0.001  |

**eTable 16. Subgroup Analysis of Ethnicity (Other)**

| Questions                            | Options                    | Cases compared to negative controls |         | Cases compared to untested controls |         |
|--------------------------------------|----------------------------|-------------------------------------|---------|-------------------------------------|---------|
|                                      |                            | Rate Ratio [CI]                     | P-value | Rate Ratio [CI]                     | P-value |
| Contact w/ SARS-Cov-2 positive       | None                       | Ref                                 | Ref     | Ref                                 | Ref     |
|                                      | Other                      | 1.07 [0.83;1.38]                    | 0.59    | 7.72 [4.52;13.18]                   | <0.001  |
|                                      | Close (<2 meter, >30 min.) | 2.21 [1.77;2.76]                    | <0.001  | 12.87 [7.72;21.45]                  | <0.001  |
| Daily contacts                       | <10                        | Ref                                 | Ref     | Ref                                 | Ref     |
|                                      | 10 to 50                   | 0.86 [0.70;1.06]                    | 0.164   | 1.20 [0.89;1.61]                    | 0.22    |
|                                      | >50                        | 1.47 [1.01;2.16]                    | 0.047   | 2.81 [1.57;5.05]                    | <0.001  |
| Bus travel                           | No                         | Ref                                 | Ref     | Ref                                 | Ref     |
|                                      | Yes                        | 0.81 [0.65;0.99]                    | 0.041   | 0.65 [0.49;0.86]                    | 0.0026  |
| Train travel                         | No                         | Ref                                 | Ref     | Ref                                 | Ref     |
|                                      | Yes                        | 0.75 [0.62;0.91]                    | 0.0037  | 0.79 [0.61;1.04]                    | 0.096   |
| Ferry travel                         | No                         | Ref                                 | Ref     | Ref                                 | Ref     |
|                                      | Yes                        | 0.90 [0.50;1.61]                    | 0.73    | 1.68 [0.64;4.41]                    | 0.3     |
| Airplane travel                      | No                         | Ref                                 | Ref     | Ref                                 | Ref     |
|                                      | Yes                        | 0.52 [0.32;0.85]                    | 0.0086  | 1.96 [0.81;4.70]                    | 0.13    |
| Indoor sports                        | No                         | Ref                                 | Ref     | Ref                                 | Ref     |
|                                      | Yes                        | 0.86 [0.67;1.12]                    | 0.27    | 1.38 [0.96;2.00]                    | 0.086   |
| Outdoor sports                       | No                         | Ref                                 | Ref     | Ref                                 | Ref     |
|                                      | Yes                        | 0.51 [0.36;0.72]                    | <0.001  | 0.83 [0.50;1.37]                    | 0.46    |
| Visiting a gym                       | No                         | Ref                                 | Ref     | Ref                                 | Ref     |
|                                      | Yes                        | 1.34 [1.07;1.69]                    | 0.011   | 1.22 [0.89;1.66]                    | 0.21    |
| Use of public swimming pool or sauna | No                         | Ref                                 | Ref     | Ref                                 | Ref     |
|                                      | Yes                        | 0.80 [0.54;1.16]                    | 0.24    | 1.16 [0.66;2.02]                    | 0.61    |
| Grocery shopping                     | No                         | Ref                                 | Ref     | Ref                                 | Ref     |
|                                      | Yes                        | 0.27 [0.19;0.39]                    | <0.001  | 0.33 [0.21;0.54]                    | <0.001  |
| Restaurants/cafés                    | No                         | Ref                                 | Ref     | Ref                                 | Ref     |
|                                      | Yes                        | 1.09 [0.89;1.32]                    | 0.4     | 1.26 [0.97;1.65]                    | 0.089   |
| Bar                                  | No                         | Ref                                 | Ref     | Ref                                 | Ref     |
|                                      | Yes                        | 1.41 [1.11;1.80]                    | 0.0048  | 2.99 [2.03;4.40]                    | <0.001  |
| Wearing a mask                       | No                         | Ref                                 | Ref     | Ref                                 | Ref     |
|                                      | Yes                        | 0.75 [0.36;1.54]                    | 0.43    | 1.18 [0.44;3.21]                    | 0.74    |
| Frequent handwashing                 | No                         | Ref                                 | Ref     | Ref                                 | Ref     |
|                                      | Yes                        | 0.70 [0.58;0.85]                    | <0.001  | 0.81 [0.62;1.05]                    | 0.1     |
| Frequent hand sanitizer use          | No                         | Ref                                 | Ref     | Ref                                 | Ref     |
|                                      | Yes                        | 0.65 [0.54;0.80]                    | <0.001  | 0.73 [0.55;0.95]                    | 0.02    |
| Sneezing in elbow                    | No                         | Ref                                 | Ref     | Ref                                 | Ref     |
|                                      | Yes                        | 0.76 [0.63;0.91]                    | 0.0024  | 1.05 [0.82;1.34]                    | 0.7     |
| Avoiding handshakes                  | No                         | Ref                                 | Ref     | Ref                                 | Ref     |
|                                      | Yes                        | 0.64 [0.53;0.77]                    | <0.001  | 0.55 [0.42;0.72]                    | <0.001  |
| Avoiding hugs                        | No                         | Ref                                 | Ref     | Ref                                 | Ref     |
|                                      | Yes                        | 0.73 [0.62;0.87]                    | <0.001  | 0.72 [0.57;0.92]                    | 0.0078  |
| Physical distancing                  | No                         | Ref                                 | Ref     | Ref                                 | Ref     |
|                                      | Yes                        | 0.64 [0.53;0.76]                    | <0.001  | 0.56 [0.43;0.72]                    | <0.001  |
| Limiting public transport            | No                         | Ref                                 | Ref     | Ref                                 | Ref     |
|                                      | Yes                        | 0.76 [0.64;0.89]                    | <0.001  | 0.70 [0.56;0.87]                    | 0.0017  |
| Avoiding social events               | No                         | Ref                                 | Ref     | Ref                                 | Ref     |
|                                      | Yes                        | 0.71 [0.60;0.83]                    | <0.001  | 0.69 [0.55;0.87]                    | 0.0019  |
| Staying more at home                 | No                         | Ref                                 | Ref     | Ref                                 | Ref     |
|                                      | Yes                        | 0.59 [0.50;0.70]                    | <0.001  | 0.58 [0.46;0.73]                    | <0.001  |

**eTable 16. Subgroup Analysis of Ethnicity (Other) (continued)**

| Questions                   | Options                           | Cases compared to negative controls |         | Cases compared to untested controls |         |
|-----------------------------|-----------------------------------|-------------------------------------|---------|-------------------------------------|---------|
|                             |                                   | Rate Ratio [CI]                     | P-value | Rate Ratio [CI]                     | P-value |
| Avoiding crowds             | No                                | Ref                                 | Ref     | Ref                                 | Ref     |
|                             | Yes                               | 0.78 [0.66;0.92]                    | 0.0029  | 0.87 [0.70;1.09]                    | 0.24    |
| Avoiding sports with others | No                                | Ref                                 | Ref     | Ref                                 | Ref     |
|                             | Yes                               | 0.86 [0.73;1.01]                    | 0.061   | 0.77 [0.62;0.96]                    | 0.019   |
| Limiting traveling          | No                                | Ref                                 | Ref     | Ref                                 | Ref     |
|                             | Yes                               | 0.83 [0.71;0.98]                    | 0.03    | 0.64 [0.51;0.81]                    | <0.001  |
| Limiting grocery shopping   | No                                | Ref                                 | Ref     | Ref                                 | Ref     |
|                             | Yes                               | 0.99 [0.83;1.18]                    | 0.92    | 0.89 [0.71;1.12]                    | 0.33    |
| Attending large event       | No                                | Ref                                 | Ref     | Ref                                 | Ref     |
|                             | Yes, >30                          | 1.06 [0.71;1.60]                    | 0.773   | 1.46 [0.80;2.67]                    | 0.213   |
|                             | Yes, >50                          | 1.46 [0.95;2.23]                    | 0.085   | 1.85 [0.92;3.73]                    | 0.087   |
| Indoor/outdoor event        | No                                | Ref                                 | Ref     | Ref                                 | Ref     |
|                             | Indoor                            | 1.43 [1.047;1.95]                   | 0.024   | 1.77 [1.092;2.87]                   | 0.021   |
|                             | Outdoor                           | 0.20 [0.047;0.88]                   | 0.033   | 0.57 [0.061;5.44]                   | 0.629   |
| Primary employment          | Non-employed                      | Ref                                 | Ref     | Ref                                 | Ref     |
|                             | Student                           | 0.69 [0.43;1.12]                    | 0.14    | 1.46 [0.81;2.63]                    | 0.211   |
|                             | Public employee                   | 0.95 [0.63;1.42]                    | 0.79    | 2.87 [1.78;4.63]                    | <0.001  |
|                             | Private employee                  | 0.76 [0.51;1.13]                    | 0.17    | 2.23 [1.40;3.53]                    | <0.001  |
|                             | Self employed                     | 1.01 [0.61;1.69]                    | 0.97    | 2.11 [1.11;3.99]                    | 0.023   |
|                             | Other                             | 0.88 [0.50;1.54]                    | 0.66    | 1.09 [0.58;2.05]                    | 0.798   |
| Type of occupation          | Non-employed                      | Ref                                 | Ref     | Ref                                 | Ref     |
|                             | At home                           | 0.55 [0.38;0.81]                    | 0.0023  | 1.21 [0.76; 1.90]                   | 0.4222  |
|                             | Own office                        | 0.84 [0.52;1.36]                    | 0.4736  | 2.12 [1.10; 4.09]                   | 0.0245  |
|                             | Shared office                     | 0.77 [0.51;1.15]                    | 0.1978  | 2.59 [1.52; 4.41]                   | <0.001  |
|                             | Retail, library or factory worker | 1.32 [0.82;2.12]                    | 0.2471  | 2.35 [1.34; 4.13]                   | 0.0029  |
|                             | Social care or education          | 1.02 [0.68;1.53]                    | 0.9096  | 5.79 [3.30;10.18]                   | <0.001  |
|                             | Healthcare sector                 | 0.89 [0.58;1.37]                    | 0.5977  | 4.83 [2.61; 8.96]                   | <0.001  |
|                             | Transport (e.g. bus/taxi-driver)  | 1.53 [0.77;3.02]                    | 0.2254  | 2.45 [1.02; 5.86]                   | 0.0439  |
|                             | Outdoors (e.g. gardener)          | 0.60 [0.22;1.65]                    | 0.3254  | 2.15 [0.40;11.70]                   | 0.3754  |
|                             | Other                             | 0.78 [0.50;1.22]                    | 0.2702  | 1.40 [0.81; 2.41]                   | 0.227   |
| Contact to people at work   | No contact                        | Ref                                 | Ref     | Ref                                 | Ref     |
|                             | Yes, close                        | 1.43 [1.13;1.80]                    | 0.0025  | 2.18 [1.56;3.04]                    | <0.001  |
|                             | Yes, other                        | 1.09 [0.86;1.38]                    | 0.4693  | 1.08 [0.78;1.50]                    | 0.645   |
| Household size              | Non-employed                      | 1.27 [0.90;1.79]                    | 0.1725  | 0.59 [0.39;0.89]                    | 0.011   |
|                             | 1 to 2 persons                    | Ref                                 | Ref     | Ref                                 | Ref     |
|                             | 3 to 4 persons                    | 0.79 [0.64;0.97]                    | 0.026   | 0.96 [0.74;1.25]                    | 0.78    |
| Education level             | >5 persons                        | 1.37 [1.00;1.87]                    | 0.048   | 1.17 [0.79;1.73]                    | 0.43    |
|                             | ISCED 0                           | Ref                                 | Ref     | Ref                                 | Ref     |
|                             | ISCED 1                           | 0.93 [0.68;1.28]                    | 0.6686  | 0.72 [0.49;1.06]                    | 0.1     |
|                             | ISCED 2                           | 0.77 [0.56;1.07]                    | 0.1245  | 0.93 [0.61;1.41]                    | 0.73    |
| Income                      | ISCED 3&4                         | 0.59 [0.42;0.83]                    | 0.0022  | 0.98 [0.64;1.48]                    | 0.91    |
|                             | 1st quartile                      | Ref                                 | Ref     | Ref                                 | Ref     |
|                             | 2nd quartile                      | 0.74 [0.59;0.91]                    | 0.0053  | 0.83 [0.63;1.11]                    | 0.205   |
|                             | 3rd quartile                      | 0.62 [0.48;0.79]                    | <0.001  | 0.90 [0.65;1.26]                    | 0.55    |
|                             | 4th quartile                      | 0.53 [0.40;0.70]                    | <0.001  | 0.69 [0.47;1.03]                    | 0.068   |

eTable 17. Cases infected in the household compared to NC

| Questions                            | Options                    | Cases compared to negative controls |         | Cases compared to untested controls |         |
|--------------------------------------|----------------------------|-------------------------------------|---------|-------------------------------------|---------|
|                                      |                            | Rate Ratio [CI]                     | P-value | Questions                           | Options |
| Contact w/ SARS-Cov-2 positive       | None                       | Ref                                 | Ref     | Ref                                 | Ref     |
|                                      | Other                      | 0.48 [0.36; 0.62]                   | <0.001  | 3.44 [2.55; 4.65]                   | <0.001  |
|                                      | Close (<2 meter, >30 min.) | 13.92 [12.39;15.64]                 | <0.001  | 143.44 [119.59;172.03]              | <0.001  |
| Daily contacts                       | <10                        | Ref                                 | Ref     | Ref                                 | Ref     |
|                                      | 10 to 50                   | 0.66 [0.59;0.73]                    | <0.001  | 1.22 [1.09;1.37]                    | <0.001  |
|                                      | >50                        | 0.70 [0.55;0.90]                    | 0.0047  | 1.09 [0.85;1.40]                    | 0.49    |
| Bus travel                           | No                         | Ref                                 | Ref     | Ref                                 | Ref     |
|                                      | Yes                        | 0.64 [0.56;0.72]                    | <0.001  | 0.67 [0.59;0.76]                    | <0.001  |
| Train travel                         | No                         | Ref                                 | Ref     | Ref                                 | Ref     |
|                                      | Yes                        | 0.54 [0.48;0.60]                    | <0.001  | 0.62 [0.56;0.69]                    | <0.001  |
| Ferry travel                         | No                         | Ref                                 | Ref     | Ref                                 | Ref     |
|                                      | Yes                        | 0.53 [0.39;0.71]                    | <0.001  | 0.61 [0.46;0.82]                    | 0.0011  |
| Airplane travel                      | No                         | Ref                                 | Ref     | Ref                                 | Ref     |
|                                      | Yes                        | 0.42 [0.27;0.66]                    | <0.001  | 0.83 [0.53;1.31]                    | 0.42    |
| Indoor sports                        | No                         | Ref                                 | Ref     | Ref                                 | Ref     |
|                                      | Yes                        | 0.90 [0.80;1.02]                    | 0.097   | 1.15 [1.01;1.31]                    | 0.033   |
| Outdoor sports                       | No                         | Ref                                 | Ref     | Ref                                 | Ref     |
|                                      | Yes                        | 0.80 [0.68;0.92]                    | 0.0028  | 0.99 [0.85;1.15]                    | 0.87    |
| Visiting a gym                       | No                         | Ref                                 | Ref     | Ref                                 | Ref     |
|                                      | Yes                        | 1.05 [0.94;1.19]                    | 0.39    | 1.25 [1.11;1.41]                    | <0.001  |
| Use of public swimming pool or sauna | No                         | Ref                                 | Ref     | Ref                                 | Ref     |
|                                      | Yes                        | 0.77 [0.63;0.93]                    | 0.0075  | 0.95 [0.78;1.15]                    | 0.59    |
| Grocery shopping                     | No                         | Ref                                 | Ref     | Ref                                 | Ref     |
|                                      | Yes                        | 0.40 [0.32;0.49]                    | <0.001  | 0.45 [0.36;0.56]                    | <0.001  |
| Restaurants/cafés                    | No                         | Ref                                 | Ref     | Ref                                 | Ref     |
|                                      | Yes                        | 0.79 [0.71;0.87]                    | <0.001  | 1.03 [0.93;1.14]                    | 0.57    |
| Bar                                  | No                         | Ref                                 | Ref     | Ref                                 | Ref     |
|                                      | Yes                        | 0.75 [0.65;0.87]                    | <0.001  | 0.95 [0.82;1.11]                    | 0.51    |
| Wearing a mask                       | No                         | Ref                                 | Ref     | Ref                                 | Ref     |
|                                      | Yes                        | 1.33 [0.69;2.56]                    | 0.39    | 1.91 [1.02;3.58]                    | 0.043   |
| Frequent handwashing                 | No                         | Ref                                 | Ref     | Ref                                 | Ref     |
|                                      | Yes                        | 1.85 [1.58;2.16]                    | <0.001  | 2.22 [1.89;2.60]                    | <0.001  |
| Frequent hand sanitizer use          | No                         | Ref                                 | Ref     | Ref                                 | Ref     |
|                                      | Yes                        | 1.48 [1.23;1.77]                    | <0.001  | 1.80 [1.51;2.16]                    | <0.001  |
| Sneezing in elbow                    | No                         | Ref                                 | Ref     | Ref                                 | Ref     |
|                                      | Yes                        | 1.70 [1.45;1.98]                    | <0.001  | 2.01 [1.72;2.36]                    | <0.001  |
| Avoiding handshakes                  | No                         | Ref                                 | Ref     | Ref                                 | Ref     |
|                                      | Yes                        | 1.35 [1.15;1.58]                    | <0.001  | 1.33 [1.13;1.57]                    | <0.001  |
| Avoiding hugs                        | No                         | Ref                                 | Ref     | Ref                                 | Ref     |
|                                      | Yes                        | 1.44 [1.28;1.63]                    | <0.001  | 1.48 [1.31;1.68]                    | <0.001  |
| Physical distancing                  | No                         | Ref                                 | Ref     | Ref                                 | Ref     |
|                                      | Yes                        | 1.45 [1.24;1.68]                    | <0.001  | 1.43 [1.22;1.66]                    | <0.001  |
| Limiting public transport            | No                         | Ref                                 | Ref     | Ref                                 | Ref     |
|                                      | Yes                        | 1.39 [1.26;1.55]                    | <0.001  | 1.36 [1.22;1.51]                    | <0.001  |
| Avoiding social events               | No                         | Ref                                 | Ref     | Ref                                 | Ref     |
|                                      | Yes                        | 1.22 [1.09;1.36]                    | <0.001  | 1.19 [1.07;1.33]                    | 0.0018  |
| Staying more at home                 | No                         | Ref                                 | Ref     | Ref                                 | Ref     |
|                                      | Yes                        | 1.20 [1.09;1.32]                    | <0.001  | 1.03 [0.94;1.14]                    | 0.51    |

**eTable 17. Cases infected in the household compared to NC (continued)**

| Questions                   | Options                           | Cases compared to negative controls |         | Cases compared to untested controls |         |
|-----------------------------|-----------------------------------|-------------------------------------|---------|-------------------------------------|---------|
|                             |                                   | Rate Ratio [CI]                     | P-value | Rate Ratio [CI]                     | P-value |
| Avoiding crowds             | No                                | Ref                                 | Ref     | Ref                                 | Ref     |
|                             | Yes                               | 1.09 [0.99;1.21]                    | 0.08    | 1.11 [1.00;1.23]                    | 0.043   |
| Avoiding sports with others | No                                | Ref                                 | Ref     | Ref                                 | Ref     |
|                             | Yes                               | 1.07 [0.98;1.17]                    | 0.15    | 0.95 [0.87;1.04]                    | 0.29    |
| Limiting traveling          | No                                | Ref                                 | Ref     | Ref                                 | Ref     |
|                             | Yes                               | 1.35 [1.20;1.52]                    | <0.001  | 1.26 [1.12;1.42]                    | <0.001  |
| Limiting grocery shopping   | No                                | Ref                                 | Ref     | Ref                                 | Ref     |
|                             | Yes                               | 1.35 [1.23;1.48]                    | <0.001  | 1.33 [1.21;1.46]                    | <0.001  |
| Attending large events      | No                                | Ref                                 | Ref     | Ref                                 | Ref     |
|                             | Yes, >30                          | 0.85 [0.68;1.07]                    | 0.1592  | 1.40 [1.10;1.77]                    | 0.0057  |
|                             | Yes, >50                          | 0.64 [0.49;0.85]                    | 0.0016  | 0.79 [0.60;1.05]                    | 0.1099  |
| Indoor/outdoor events       | No                                | Ref                                 | Ref     | Ref                                 | Ref     |
|                             | Indoor                            | 0.79 [0.65;0.94]                    | 0.0096  | 1.17 [0.97;1.42]                    | 0.104   |
|                             | Outdoor                           | 0.34 [0.15;0.77]                    | 0.0101  | 0.35 [0.15;0.80]                    | 0.013   |
| Primary employment          | Non-employed                      | Ref                                 | Ref     | Ref                                 | Ref     |
|                             | Student                           | 0.89 [0.68;1.17]                    | 0.4174  | 2.05 [1.57;2.68]                    | <0.001  |
|                             | Public employee                   | 0.71 [0.57;0.88]                    | 0.0016  | 2.45 [1.99;3.03]                    | <0.001  |
|                             | Private employee                  | 0.87 [0.70;1.07]                    | 0.1811  | 1.48 [1.21;1.82]                    | <0.001  |
|                             | Self-employed                     | 0.87 [0.67;1.13]                    | 0.3039  | 1.44 [1.11;1.86]                    | 0.0054  |
|                             | Other                             | 0.83 [0.61;1.15]                    | 0.2662  | 1.05 [0.76;1.45]                    | 0.7506  |
| Type of occupation          | Non-employed                      | Ref                                 | Ref     | Ref                                 | Ref     |
|                             | At home                           | 0.90 [0.74;1.10]                    | 0.31    | 1.44 [1.18;1.76]                    | <0.001  |
|                             | Own office                        | 0.89 [0.70;1.13]                    | 0.337   | 1.72 [1.35;2.20]                    | <0.001  |
|                             | Shared office                     | 0.93 [0.75;1.15]                    | 0.485   | 1.69 [1.37;2.08]                    | <0.001  |
|                             | Retail, library or factory worker | 0.76 [0.57;1.00]                    | 0.049   | 0.99 [0.75;1.31]                    | 0.97    |
|                             | Social care or education          | 0.69 [0.55;0.86]                    | <0.001  | 3.16 [2.53;3.96]                    | <0.001  |
|                             | Healthcare sector                 | 0.63 [0.50;0.81]                    | <0.001  | 4.48 [3.47;5.80]                    | <0.001  |
|                             | Transport (e.g. bus/taxi-driver)  | 0.83 [0.47;1.47]                    | 0.52    | 1.19 [0.66;2.17]                    | 0.562   |
|                             | Outdoors (e.g. gardener)          | 0.63 [0.41;0.95]                    | 0.026   | 0.80 [0.53;1.21]                    | 0.289   |
|                             | Other                             | 0.86 [0.66;1.11]                    | 0.24    | 1.28 [0.99;1.64]                    | 0.061   |
| Contact to people at work   | No contact                        | Ref                                 | Ref     | Ref                                 | Ref     |
|                             | Yes, close                        | 0.67 [0.59;0.77]                    | <0.001  | 1.79 [1.56;2.06]                    | <0.001  |
|                             | Yes, other                        | 0.87 [0.77;0.97]                    | 0.014   | 1.05 [0.93;1.18]                    | 0.43    |
|                             | Non-employed                      | 1.09 [0.91;1.31]                    | 0.364   | 0.71 [0.59;0.85]                    | <0.001  |
| Household size              | 1 to 2 persons                    | Ref                                 | Ref     | Ref                                 | Ref     |
|                             | 3 to 4 persons                    | 1.85 [1.64;2.08]                    | <0.001  | 2.47 [2.20;2.78]                    | <0.001  |
|                             | >5 persons                        | 2.90 [2.43;3.47]                    | <0.001  | 4.55 [3.78;5.48]                    | <0.001  |
| Education level             | ISCED 0                           | Ref                                 | Ref     | Ref                                 | Ref     |
|                             | ISCED 1                           | 1.01 [0.83;1.23]                    | 0.91    | 1.28 [1.05;1.55]                    | 0.013   |
|                             | ISCED 2                           | 1.09 [0.89;1.32]                    | 0.41    | 1.72 [1.41;2.10]                    | <0.001  |
|                             | ISCED 3&4                         | 1.09 [0.89;1.33]                    | 0.42    | 1.53 [1.24;1.88]                    | <0.001  |
| Income                      | 1st quartile                      | Ref                                 | Ref     | Ref                                 | Ref     |
|                             | 2nd quartile                      | 1.02 [0.88;1.18]                    | 0.7838  | 1.21 [1.04;1.40]                    | 0.011   |
|                             | 3rd quartile                      | 1.10 [0.95;1.28]                    | 0.2048  | 1.38 [1.19;1.61]                    | <0.001  |
|                             | 4th quartile                      | 1.25 [1.07;1.46]                    | 0.0046  | 1.45 [1.25;1.69]                    | <0.001  |
| Ethnicity                   | Danish                            | Ref                                 | Ref     | Ref                                 | Ref     |
|                             | Other                             | 1.29 [1.13;1.48]                    | <0.001  | 2.87 [2.48;3.33]                    | <0.001  |

**eTable 18. Main analysis adjusted for wearing a mask**

| Questions                            | Options                    | Cases compared to negative controls |         | Cases compared to untested controls |         |
|--------------------------------------|----------------------------|-------------------------------------|---------|-------------------------------------|---------|
|                                      |                            | Rate Ratio [CI]                     | P-value | Rate Ratio [CI]                     | Options |
| Contact w/ SARS-Cov-2 positive       | None                       | Ref                                 | Ref     | Ref                                 | Ref     |
|                                      | Other                      | 1.78 [1.66;1.90]                    | <0.001  | 14.07 [12.70;15.59]                 | <0.001  |
| Daily contacts                       | Close (<2 meter, >30 min.) | 2.99 [2.81;3.19]                    | <0.001  | 34.38 [30.55;38.68]                 | <0.001  |
|                                      | <10                        | Ref                                 | Ref     | Ref                                 | Ref     |
|                                      | 10 to 50                   | 1.06 [1.00;1.12]                    | 0.046   | 1.84 [1.73;1.96]                    | <0.001  |
| Bus travel                           | >50                        | 1.25 [1.11;1.40]                    | <0.001  | 1.81 [1.60;2.05]                    | <0.001  |
|                                      | No                         | Ref                                 | Ref     | Ref                                 | Ref     |
| Train travel                         | Yes                        | 0.83 [0.78;0.88]                    | <0.001  | 0.86 [0.81;0.92]                    | <0.001  |
|                                      | No                         | Ref                                 | Ref     | Ref                                 | Ref     |
| Ferry travel                         | Yes                        | 0.86 [0.81;0.91]                    | <0.001  | 0.97 [0.92;1.03]                    | 0.37    |
|                                      | No                         | Ref                                 | Ref     | Ref                                 | Ref     |
| Airplane travel                      | Yes                        | 0.78 [0.68;0.89]                    | <0.001  | 0.85 [0.74;0.97]                    | 0.018   |
|                                      | No                         | Ref                                 | Ref     | Ref                                 | Ref     |
| Indoor sports                        | Yes                        | 0.70 [0.58;0.85]                    | <0.001  | 1.28 [1.03;1.59]                    | 0.028   |
|                                      | No                         | Ref                                 | Ref     | Ref                                 | Ref     |
| Outdoor sports                       | Yes                        | 1.16 [1.09;1.23]                    | <0.001  | 1.55 [1.44;1.65]                    | <0.001  |
|                                      | No                         | Ref                                 | Ref     | Ref                                 | Ref     |
| Visiting a gym                       | Yes                        | 0.76 [0.70;0.82]                    | <0.001  | 0.96 [0.88;1.05]                    | 0.4     |
|                                      | No                         | Ref                                 | Ref     | Ref                                 | Ref     |
| Use of public swimming pool or sauna | Yes                        | 1.27 [1.19;1.35]                    | <0.001  | 1.55 [1.45;1.66]                    | <0.001  |
|                                      | No                         | Ref                                 | Ref     | Ref                                 | Ref     |
| Grocery shopping                     | Yes                        | 0.88 [0.80;0.98]                    | 0.016   | 1.08 [0.97;1.20]                    | 0.18    |
|                                      | No                         | Ref                                 | Ref     | Ref                                 | Ref     |
| Restaurants/cafés                    | Yes                        | 0.52 [0.46;0.59]                    | <0.001  | 0.62 [0.54;0.70]                    | <0.001  |
|                                      | No                         | Ref                                 | Ref     | Ref                                 | Ref     |
| Bar                                  | Yes                        | 1.07 [1.02;1.13]                    | 0.012   | 1.39 [1.31;1.47]                    | <0.001  |
|                                      | No                         | Ref                                 | Ref     | Ref                                 | Ref     |
| Frequent handwashing                 | Yes                        | 1.29 [1.20;1.39]                    | <0.001  | 1.67 [1.54;1.80]                    | <0.001  |
|                                      | No                         | Ref                                 | Ref     | Ref                                 | Ref     |
| Frequent hand sanitizer use          | Yes                        | 1.86 [1.68;2.07]                    | <0.001  | 2.59 [2.33;2.88]                    | <0.001  |
|                                      | No                         | Ref                                 | Ref     | Ref                                 | Ref     |
| Sneezing in elbow                    | Yes                        | 1.32 [1.14;1.54]                    | <0.001  | 2.57 [2.20;2.99]                    | <0.001  |
|                                      | No                         | Ref                                 | Ref     | Ref                                 | Ref     |
| Avoiding handshakes                  | Yes                        | 1.55 [1.40;1.71]                    | <0.001  | 2.25 [2.03;2.50]                    | <0.001  |
|                                      | No                         | Ref                                 | Ref     | Ref                                 | Ref     |
| Avoiding hugs                        | Yes                        | 0.91 [0.82;1.00]                    | 0.061   | 1.12 [1.01;1.24]                    | 0.038   |
|                                      | No                         | Ref                                 | Ref     | Ref                                 | Ref     |
| Physical distancing                  | Yes                        | 1.05 [0.98;1.13]                    | 0.17    | 1.21 [1.13;1.30]                    | <0.001  |
|                                      | No                         | Ref                                 | Ref     | Ref                                 | Ref     |
| Limiting public transport            | Yes                        | 0.99 [0.90;1.09]                    | 0.87    | 1.18 [1.07;1.29]                    | <0.001  |
|                                      | No                         | Ref                                 | Ref     | Ref                                 | Ref     |
| Avoiding social events               | Yes                        | 1.14 [1.08;1.21]                    | <0.001  | 1.18 [1.11;1.26]                    | <0.001  |
|                                      | No                         | Ref                                 | Ref     | Ref                                 | Ref     |
| Staying more at home                 | Yes                        | 0.94 [0.88;1.00]                    | 0.034   | 0.98 [0.92;1.04]                    | 0.56    |
|                                      | No                         | Ref                                 | Ref     | Ref                                 | Ref     |
|                                      | Yes                        | 0.78 [0.74;0.83]                    | <0.001  | 0.71 [0.67;0.75]                    | <0.001  |
|                                      | No                         | Ref                                 | Ref     | Ref                                 | Ref     |

**eTable 18. Main analysis adjusted for wearing a mask (continued)**



| Questions                   | Options                           | Cases compared to negative controls |         | Cases compared to untested controls |         |
|-----------------------------|-----------------------------------|-------------------------------------|---------|-------------------------------------|---------|
|                             |                                   | Rate Ratio [CI]                     | P-value | Rate Ratio [CI]                     | P-value |
| Avoiding crowds             | No                                | Ref                                 | Ref     | Ref                                 | Ref     |
|                             | Yes                               | 0.99 [0.93;1.04]                    | 0.61    | 1.04 [0.98;1.10]                    | 0.24    |
| Avoiding sports with others | No                                | Ref                                 | Ref     | Ref                                 | Ref     |
|                             | Yes                               | 0.96 [0.91;1.01]                    | 0.13    | 0.88 [0.84;0.93]                    | <0.001  |
| Limiting traveling          | No                                | Ref                                 | Ref     | Ref                                 | Ref     |
|                             | Yes                               | 1.14 [1.07;1.22]                    | <0.001  | 1.09 [1.02;1.17]                    | 0.015   |
| Limiting grocery shopping   | No                                | Ref                                 | Ref     | Ref                                 | Ref     |
|                             | Yes                               | 1.14 [1.08;1.20]                    | <0.001  | 1.12 [1.06;1.19]                    | <0.001  |
| Attending large events      | No                                | Ref                                 | Ref     | Ref                                 | Ref     |
|                             | Yes, >30                          | 1.49 [1.34;1.66]                    | <0.001  | 2.24 [1.99;2.52]                    | <0.001  |
|                             | Yes, >50                          | 1.72 [1.55;1.92]                    | <0.001  | 2.23 [1.98;2.51]                    | <0.001  |
| Indoor/outdoor events       | No                                | Ref                                 | Ref     | Ref                                 | Ref     |
|                             | Indoor                            | 1.63 [1.51;1.77]                    | <0.001  | 2.38 [2.17;2.61]                    | <0.001  |
|                             | Outdoor                           | 1.26 [0.97;1.63]                    | 0.086   | 1.30 [0.99;1.70]                    | 0.055   |
| Primary employment          | Non-employed                      | Ref                                 | Ref     | Ref                                 | Ref     |
|                             | Student                           | 1.20 [1.03;1.39]                    | 0.016   | 2.77 [2.38;3.21]                    | <0.001  |
|                             | Public employee                   | 1.33 [1.18;1.50]                    | <0.001  | 4.37 [3.86;4.93]                    | <0.001  |
|                             | Private employee                  | 1.23 [1.09;1.39]                    | <0.001  | 2.12 [1.88;2.39]                    | <0.001  |
|                             | Self-employed                     | 1.35 [1.17;1.57]                    | <0.001  | 2.10 [1.81;2.43]                    | <0.001  |
|                             | Other                             | 1.02 [0.86;1.21]                    | 0.818   | 1.35 [1.14;1.60]                    | <0.001  |
| Type of occupation          | Non-employed                      | Ref                                 | Ref     | Ref                                 | Ref     |
|                             | At home                           | 0.93 [0.83;1.05]                    | 0.2466  | 1.42 [1.27;1.60]                    | <0.001  |
|                             | Own office                        | 1.24 [1.08;1.43]                    | 0.0018  | 2.19 [1.90;2.52]                    | <0.001  |
|                             | Shared office                     | 1.35 [1.20;1.53]                    | <0.001  | 2.25 [2.00;2.54]                    | <0.001  |
|                             | Retail, library or factory worker | 1.45 [1.26;1.67]                    | <0.001  | 1.81 [1.57;2.09]                    | <0.001  |
|                             | Social care or education          | 1.51 [1.35;1.70]                    | <0.001  | 6.35 [5.60;7.20]                    | <0.001  |
|                             | Healthcare sector                 | 1.23 [1.08;1.41]                    | 0.0016  | 7.96 [6.86;9.25]                    | <0.001  |
|                             | Transport (e.g. bus/taxi-driver)  | 1.32 [0.97;1.81]                    | 0.0751  | 1.99 [1.44;2.76]                    | <0.001  |
|                             | Outdoors (e.g. gardener)          | 1.18 [0.96;1.44]                    | 0.1161  | 1.30 [1.06;1.60]                    | 0.012   |
|                             | Other                             | 1.26 [1.10;1.45]                    | <0.001  | 1.92 [1.68;2.20]                    | <0.001  |
| Contact to people at work   | No contact                        | Ref                                 | Ref     | Ref                                 | Ref     |
|                             | Yes, close                        | 1.25 [1.16;1.34]                    | <0.001  | 3.08 [2.85;3.34]                    | <0.001  |
|                             | Yes, other                        | 1.11 [1.04;1.19]                    | 0.0015  | 1.31 [1.22;1.40]                    | <0.001  |
| Household size              | Non-employed                      | 0.90 [0.81;0.99]                    | 0.0387  | 0.61 [0.55;0.68]                    | <0.001  |
|                             | 1 to 2 persons                    | Ref                                 | Ref     | Ref                                 | Ref     |
|                             | 3 to 4 persons                    | 0.93 [0.87;1.00]                    | 0.042   | 1.25 [1.17;1.34]                    | <0.001  |
| Education level             | >5 persons                        | 1.09 [0.97;1.23]                    | 0.160   | 1.76 [1.55;1.99]                    | <0.001  |
|                             | ISCED 0                           | Ref                                 | Ref     | Ref                                 | Ref     |
|                             | ISCED 1                           | 1.06 [0.96;1.18]                    | 0.25    | 1.39 [1.25;1.55]                    | <0.001  |
|                             | ISCED 2                           | 1.13 [1.01;1.25]                    | 0.03    | 1.84 [1.65;2.05]                    | <0.001  |
| Income                      | ISCED 3&4                         | 0.94 [0.84;1.06]                    | 0.32    | 1.37 [1.22;1.54]                    | <0.001  |
|                             | 1st quartile                      | Ref                                 | Ref     | Ref                                 | Ref     |
|                             | 2nd quartile                      | 0.91 [0.84;0.98]                    | 0.013   | 1.07 [0.99;1.16]                    | 0.10    |
|                             | 3rd quartile                      | 0.94 [0.87;1.02]                    | 0.149   | 1.15 [1.06;1.25]                    | <0.001  |
| Ethnicity                   | 4th quartile                      | 0.93 [0.86;1.02]                    | 0.107   | 1.05 [0.96;1.14]                    | 0.26    |
|                             | Danish                            | Ref                                 | Ref     | Ref                                 | Ref     |
|                             | Other                             | 1.23 [1.13;1.33]                    | <0.001  | 2.76 [2.51;3.04]                    | <0.001  |

**eTable 19. Main analysis adjusted for handwashing**

| Questions                            | Options                    | Cases compared to negative controls |         | Cases compared to untested controls |         |
|--------------------------------------|----------------------------|-------------------------------------|---------|-------------------------------------|---------|
|                                      |                            | Rate Ratio [CI]                     | P-value | Rate Ratio [CI]                     | Options |
| Contact w/ SARS-Cov-2 positive       | None                       | Ref                                 | Ref     | Ref                                 | Ref     |
|                                      | Other                      | 1.73 [1.61;1.85]                    | <0.001  | 13.30 [11.99;14.74]                 | <0.001  |
| Daily contacts                       | Close (<2 meter, >30 min.) | 2.93 [2.75;3.12]                    | <0.001  | 33.03 [29.32;37.22]                 | <0.001  |
|                                      | <10                        | Ref                                 | Ref     | Ref                                 | Ref     |
|                                      | 10 to 50                   | 1.06 [1.00;1.12]                    | 0.057   | 1.87 [1.75;1.98]                    | <0.001  |
| Bus travel                           | >50                        | 1.24 [1.10;1.40]                    | <0.001  | 1.80 [1.58;2.05]                    | <0.001  |
|                                      | No                         | Ref                                 | Ref     | Ref                                 | Ref     |
| Train travel                         | Yes                        | 0.83 [0.78;0.88]                    | <0.001  | 0.87 [0.81;0.93]                    | <0.001  |
|                                      | No                         | Ref                                 | Ref     | Ref                                 | Ref     |
| Ferry travel                         | Yes                        | 0.85 [0.80;0.90]                    | <0.001  | 0.97 [0.91;1.03]                    | 0.31    |
|                                      | No                         | Ref                                 | Ref     | Ref                                 | Ref     |
| Airplane travel                      | Yes                        | 0.77 [0.67;0.88]                    | <0.001  | 0.85 [0.74;0.98]                    | 0.024   |
|                                      | No                         | Ref                                 | Ref     | Ref                                 | Ref     |
| Indoor sports                        | Yes                        | 0.67 [0.55;0.83]                    | <0.001  | 1.26 [1.00;1.58]                    | 0.05    |
|                                      | No                         | Ref                                 | Ref     | Ref                                 | Ref     |
| Outdoor sports                       | Yes                        | 1.16 [1.09;1.24]                    | <0.001  | 1.56 [1.45;1.67]                    | <0.001  |
|                                      | No                         | Ref                                 | Ref     | Ref                                 | Ref     |
| Visiting a gym                       | Yes                        | 0.76 [0.70;0.83]                    | <0.001  | 0.97 [0.88;1.05]                    | 0.43    |
|                                      | No                         | Ref                                 | Ref     | Ref                                 | Ref     |
| Use of public swimming pool or sauna | Yes                        | 1.28 [1.20;1.37]                    | <0.001  | 1.59 [1.49;1.70]                    | <0.001  |
|                                      | No                         | Ref                                 | Ref     | Ref                                 | Ref     |
| Grocery shopping                     | Yes                        | 0.88 [0.79;0.97]                    | 0.013   | 1.10 [0.98;1.22]                    | 0.095   |
|                                      | No                         | Ref                                 | Ref     | Ref                                 | Ref     |
| Restaurants/cafés                    | Yes                        | 0.53 [0.46;0.60]                    | <0.001  | 0.63 [0.55;0.72]                    | <0.001  |
|                                      | No                         | Ref                                 | Ref     | Ref                                 | Ref     |
| Bar                                  | Yes                        | 1.08 [1.02;1.14]                    | 0.005   | 1.41 [1.33;1.49]                    | <0.001  |
|                                      | No                         | Ref                                 | Ref     | Ref                                 | Ref     |
| Wearing a mask                       | Yes                        | 1.32 [1.23;1.42]                    | <0.001  | 1.70 [1.57;1.84]                    | <0.001  |
|                                      | No                         | Ref                                 | Ref     | Ref                                 | Ref     |
| Frequent hand sanitizer use          | Yes                        | 1.01 [0.72;1.43]                    | 0.93    | 1.31 [0.94;1.83]                    | 0.12    |
|                                      | No                         | Ref                                 | Ref     | Ref                                 | Ref     |
| Sneezing in elbow                    | Yes                        | 0.71 [0.64;0.79]                    | <0.001  | 0.93 [0.84;1.03]                    | 0.17    |
|                                      | No                         | Ref                                 | Ref     | Ref                                 | Ref     |
| Avoiding handshakes                  | Yes                        | 1.04 [0.95;1.13]                    | 0.42    | 1.26 [1.15;1.37]                    | <0.001  |
|                                      | No                         | Ref                                 | Ref     | Ref                                 | Ref     |
| Avoiding hugs                        | Yes                        | 0.67 [0.62;0.74]                    | <0.001  | 0.67 [0.62;0.74]                    | <0.001  |
|                                      | No                         | Ref                                 | Ref     | Ref                                 | Ref     |
| Physical distancing                  | Yes                        | 0.89 [0.83;0.95]                    | <0.001  | 0.93 [0.87;1.00]                    | 0.051   |
|                                      | No                         | Ref                                 | Ref     | Ref                                 | Ref     |
| Limiting public transport            | Yes                        | 0.76 [0.70;0.82]                    | <0.001  | 0.76 [0.70;0.83]                    | <0.001  |
|                                      | No                         | Ref                                 | Ref     | Ref                                 | Ref     |
| Avoiding social events               | Yes                        | 1.04 [0.98;1.10]                    | 0.22    | 0.99 [0.94;1.05]                    | 0.82    |
|                                      | No                         | Ref                                 | Ref     | Ref                                 | Ref     |
| Staying more at home                 | Yes                        | 0.84 [0.80;0.89]                    | <0.001  | 0.82 [0.77;0.87]                    | <0.001  |
|                                      | No                         | Ref                                 | Ref     | Ref                                 | Ref     |
|                                      | Yes                        | 0.74 [0.70;0.78]                    | <0.001  | 0.65 [0.62;0.69]                    | <0.001  |

eTable 19. Main analysis adjusted for handwashing (continued)

| Questions                   | Options                           | Cases compared to negative controls |         | Cases compared to untested controls |         |
|-----------------------------|-----------------------------------|-------------------------------------|---------|-------------------------------------|---------|
|                             |                                   | Rate Ratio [CI]                     | P-value | Rate Ratio [CI]                     | P-value |
| Avoiding crowds             | No                                | Ref                                 | Ref     | Ref                                 | Ref     |
|                             | Yes                               | 0.89 [0.84;0.94]                    | <0.001  | 0.88 [0.83;0.93]                    | <0.001  |
| Avoiding sports with others | No                                | Ref                                 | Ref     | Ref                                 | Ref     |
|                             | Yes                               | 0.90 [0.85;0.94]                    | <0.001  | 0.78 [0.74;0.82]                    | <0.001  |
| Limiting traveling          | No                                | Ref                                 | Ref     | Ref                                 | Ref     |
|                             | Yes                               | 0.99 [0.93;1.05]                    | 0.69    | 0.87 [0.81;0.93]                    | <0.001  |
| Limiting grocery shopping   | No                                | Ref                                 | Ref     | Ref                                 | Ref     |
|                             | Yes                               | 1.08 [1.03;1.14]                    | 0.004   | 1.02 [0.97;1.08]                    | 0.43    |
| Attending large events      | No                                | Ref                                 | Ref     | Ref                                 | Ref     |
|                             | Yes, >30                          | 1.48 [1.33;1.65]                    | <0.001  | 2.20 [1.95;2.49]                    | <0.001  |
|                             | Yes, >50                          | 1.69 [1.51;1.88]                    | <0.001  | 2.22 [1.96;2.51]                    | <0.001  |
| Indoor/outdoor events       | No                                | Ref                                 | Ref     | Ref                                 | Ref     |
|                             | Indoor                            | 1.61 [1.48;1.75]                    | <0.001  | 2.35 [2.14;2.58]                    | <0.001  |
|                             | Outdoor                           | 1.24 [0.95;1.61]                    | 0.12    | 1.28 [0.98;1.69]                    | 0.074   |
| Primary employment          | Non-employed                      | Ref                                 | Ref     | Ref                                 | Ref     |
|                             | Student                           | 1.19 [1.02;1.38]                    | 0.025   | 2.77 [2.38;3.23]                    | <0.001  |
|                             | Public employee                   | 1.33 [1.18;1.50]                    | <0.001  | 4.35 [3.84;4.92]                    | <0.001  |
|                             | Private employee                  | 1.23 [1.09;1.39]                    | <0.001  | 2.11 [1.86;2.38]                    | <0.001  |
|                             | Self-employed                     | 1.36 [1.17;1.58]                    | <0.001  | 2.14 [1.84;2.49]                    | <0.001  |
| Type of occupation          | Other                             | 1.04 [0.87;1.24]                    | 0.669   | 1.35 [1.14;1.61]                    | <0.001  |
|                             | Non-employed                      | Ref                                 | Ref     | Ref                                 | Ref     |
|                             | At home                           | 0.94 [0.84;1.06]                    | 0.3155  | 1.42 [1.26;1.60]                    | <0.001  |
|                             | Own office                        | 1.23 [1.07;1.41]                    | 0.0039  | 2.27 [1.96;2.62]                    | <0.001  |
|                             | Shared office                     | 1.35 [1.19;1.52]                    | <0.001  | 2.25 [1.99;2.55]                    | <0.001  |
|                             | Retail, library or factory worker | 1.47 [1.27;1.70]                    | <0.001  | 1.79 [1.55;2.07]                    | <0.001  |
|                             | Social care or education          | 1.49 [1.32;1.68]                    | <0.001  | 6.34 [5.58;7.21]                    | <0.001  |
|                             | Healthcare sector                 | 1.25 [1.09;1.43]                    | 0.0010  | 8.04 [6.89;9.37]                    | <0.001  |
|                             | Transport (e.g. bus/taxi-driver)  | 1.38 [1.01;1.89]                    | 0.0450  | 2.01 [1.44;2.80]                    | <0.001  |
| Outdoors (e.g. gardener)    | Outdoors (e.g. gardener)          | 1.20 [0.97;1.47]                    | 0.0932  | 1.40 [1.14;1.73]                    | 0.0016  |
|                             | Other                             | 1.28 [1.12;1.47]                    | <0.001  | 1.87 [1.63;2.15]                    | <0.001  |
|                             | Other                             | 1.28 [1.12;1.47]                    | <0.001  | 1.87 [1.63;2.15]                    | <0.001  |
| Contact to people at work   | No contact                        | Ref                                 | Ref     | Ref                                 | Ref     |
|                             | Yes, close                        | 1.26 [1.17;1.35]                    | <0.001  | 3.11 [2.87;3.37]                    | <0.001  |
|                             | Yes, other                        | 1.12 [1.05;1.20]                    | <0.001  | 1.33 [1.24;1.42]                    | <0.001  |
| Household size              | Non-employed                      | 0.89 [0.80;0.99]                    | 0.038   | 0.60 [0.54;0.67]                    | <0.001  |
|                             | 1 to 2 persons                    | Ref                                 | Ref     | Ref                                 | Ref     |
|                             | 3 to 4 persons                    | 0.95 [0.89;1.01]                    | 0.102   | 1.28 [1.20;1.37]                    | <0.001  |
| Education level             | >5 persons                        | 1.13 [1.01;1.27]                    | 0.034   | 1.83 [1.62;2.07]                    | <0.001  |
|                             | ISCED 0                           | Ref                                 | Ref     | Ref                                 | Ref     |
|                             | ISCED 1                           | 1.02 [0.92;1.12]                    | 0.741   | 1.32 [1.19;1.46]                    | <0.001  |
|                             | ISCED 2                           | 1.06 [0.95;1.17]                    | 0.296   | 1.73 [1.56;1.92]                    | <0.001  |
| Income                      | ISCED 3&4                         | 0.88 [0.79;0.99]                    | 0.027   | 1.29 [1.15;1.44]                    | <0.001  |
|                             | 1st quartile                      | Ref                                 | Ref     | Ref                                 | Ref     |
|                             | 2nd quartile                      | 0.89 [0.82;0.96]                    | 0.0022  | 1.05 [0.97;1.13]                    | 0.216   |
|                             | 3rd quartile                      | 0.91 [0.85;0.99]                    | 0.0255  | 1.10 [1.02;1.20]                    | 0.016   |
| Ethnicity                   | 4th quartile                      | 0.88 [0.81;0.96]                    | 0.0025  | 1.03 [0.95;1.12]                    | 0.462   |
|                             | Danish                            | Ref                                 | Ref     | Ref                                 | Ref     |
|                             | Other                             | 1.31 [1.21;1.41]                    | <0.001  | 2.95 [2.69;3.23]                    | <0.001  |

**eTable 20. Main analysis adjusted for wearing a mask and handwashing**

| Questions                            | Options                    | Cases compared to negative controls |         | Cases compared to untested controls |         |
|--------------------------------------|----------------------------|-------------------------------------|---------|-------------------------------------|---------|
|                                      |                            | Rate Ratio [CI]                     | P-value | Qu Rate Ratio [CI]                  | Options |
| Contact w/ SARS-Cov-2 positive       | None                       | Ref                                 | Ref     | Ref                                 | Ref     |
|                                      | Other                      | 1.74 [1.62;1.86]                    | <0.001  | 13.70 [12.32;15.23]                 | <0.001  |
| Daily contacts                       | Close (<2 meter, >30 min.) | 2.95 [2.77;3.15]                    | <0.001  | 33.57 [29.70;37.94]                 | <0.001  |
|                                      | <10                        | Ref                                 | Ref     | Ref                                 | Ref     |
|                                      | 10 to 50                   | 1.06 [1.00;1.12]                    | 0.052   | 1.87 [1.76;1.99]                    | <0.001  |
| Bus travel                           | >50                        | 1.24 [1.10;1.40]                    | <0.001  | 1.84 [1.62;2.10]                    | <0.001  |
|                                      | No                         | Ref                                 | Ref     | Ref                                 | Ref     |
| Train travel                         | Yes                        | 0.83 [0.78;0.88]                    | <0.001  | 0.87 [0.82;0.93]                    | <0.001  |
|                                      | No                         | Ref                                 | Ref     | Ref                                 | Ref     |
| Ferry travel                         | Yes                        | 0.85 [0.80;0.90]                    | <0.001  | 0.97 [0.91;1.03]                    | 0.36    |
|                                      | No                         | Ref                                 | Ref     | Ref                                 | Ref     |
| Airplane travel                      | Yes                        | 0.77 [0.67;0.88]                    | <0.001  | 0.86 [0.74;0.99]                    | 0.037   |
|                                      | No                         | Ref                                 | Ref     | Ref                                 | Ref     |
| Indoor sports                        | Yes                        | 0.68 [0.55;0.83]                    | <0.001  | 1.26 [1.00;1.58]                    | 0.05    |
|                                      | No                         | Ref                                 | Ref     | Ref                                 | Ref     |
| Outdoor sports                       | Yes                        | 1.16 [1.08;1.23]                    | <0.001  | 1.57 [1.46;1.68]                    | <0.001  |
|                                      | No                         | Ref                                 | Ref     | Ref                                 | Ref     |
| Visiting a gym                       | Yes                        | 0.76 [0.70;0.83]                    | <0.001  | 0.97 [0.89;1.06]                    | 0.47    |
|                                      | No                         | Ref                                 | Ref     | Ref                                 | Ref     |
| Use of public swimming pool or sauna | Yes                        | 1.29 [1.21;1.37]                    | <0.001  | 1.60 [1.49;1.71]                    | <0.001  |
|                                      | No                         | Ref                                 | Ref     | Ref                                 | Ref     |
| Grocery shopping                     | Yes                        | 0.88 [0.79;0.98]                    | 0.015   | 1.10 [0.98;1.22]                    | 0.1     |
|                                      | No                         | Ref                                 | Ref     | Ref                                 | Ref     |
| Restaurants/cafés                    | Yes                        | 0.53 [0.46;0.60]                    | <0.001  | 0.63 [0.55;0.72]                    | <0.001  |
|                                      | No                         | Ref                                 | Ref     | Ref                                 | Ref     |
| Bar                                  | Yes                        | 1.08 [1.02;1.14]                    | 0.0061  | 1.41 [1.33;1.50]                    | <0.001  |
|                                      | No                         | Ref                                 | Ref     | Ref                                 | Ref     |
| Frequent hand sanitizer use          | Yes                        | 1.32 [1.22;1.41]                    | <0.001  | 1.71 [1.58;1.85]                    | <0.001  |
|                                      | No                         | Ref                                 | Ref     | Ref                                 | Ref     |
| Sneezing in elbow                    | Yes                        | 1.14 [0.96;1.35]                    | 0.12    | 2.12 [1.79;2.50]                    | <0.001  |
|                                      | No                         | Ref                                 | Ref     | Ref                                 | Ref     |
| Avoiding handshakes                  | Yes                        | 1.39 [1.25;1.55]                    | <0.001  | 1.99 [1.78;2.23]                    | <0.001  |
|                                      | No                         | Ref                                 | Ref     | Ref                                 | Ref     |
| Avoiding hugs                        | Yes                        | 0.84 [0.75;0.93]                    | 0.0013  | 0.97 [0.87;1.09]                    | 0.64    |
|                                      | No                         | Ref                                 | Ref     | Ref                                 | Ref     |
| Physical distancing                  | Yes                        | 1.01 [0.94;1.08]                    | 0.8     | 1.12 [1.04;1.20]                    | 0.0039  |
|                                      | No                         | Ref                                 | Ref     | Ref                                 | Ref     |
| Limiting public transport            | Yes                        | 0.93 [0.84;1.02]                    | 0.12    | 1.05 [0.95;1.16]                    | 0.32    |
|                                      | No                         | Ref                                 | Ref     | Ref                                 | Ref     |
| Avoiding social events               | Yes                        | 1.11 [1.05;1.18]                    | <0.001  | 1.10 [1.03;1.17]                    | 0.0031  |
|                                      | No                         | Ref                                 | Ref     | Ref                                 | Ref     |
| Staying more at home                 | Yes                        | 0.90 [0.85;0.96]                    | 0.0014  | 0.91 [0.86;0.98]                    | 0.0068  |
|                                      | No                         | Ref                                 | Ref     | Ref                                 | Ref     |
| Avoiding crowds                      | Yes                        | 0.77 [0.73;0.82]                    | <0.001  | 0.69 [0.65;0.73]                    | <0.001  |
|                                      | No                         | Ref                                 | Ref     | Ref                                 | Ref     |
|                                      | Yes                        | 0.94 [0.89;1.00]                    | 0.053   | 0.96 [0.90;1.02]                    | 0.15    |

**eTable 20. Main analysis adjusted for wearing a mask and handwashing**  
(continued)

| Questions                   | Options                           | Cases compared to negative controls |         | Cases compared to untested controls |         |
|-----------------------------|-----------------------------------|-------------------------------------|---------|-------------------------------------|---------|
|                             |                                   | Rate Ratio [CI]                     | P-value | Rate Ratio [CI]                     | P-value |
| Avoiding sports with others | No                                | Ref                                 | Ref     | Ref                                 | Ref     |
|                             | Yes                               | 0.93 [0.88;0.98]                    | 0.004   | 0.82 [0.77;0.86]                    | <0.001  |
| Limiting traveling          | No                                | Ref                                 | Ref     | Ref                                 | Ref     |
|                             | Yes                               | 1.10 [1.03;1.18]                    | 0.0049  | 1.02 [0.95;1.10]                    | 0.63    |
| Limiting grocery shopping   | No                                | Ref                                 | Ref     | Ref                                 | Ref     |
|                             | Yes                               | 1.10 [1.04;1.16]                    | <0.001  | 1.05 [0.99;1.11]                    | 0.1     |
| Attending large events      | No                                | Ref                                 | Ref     | Ref                                 | Ref     |
|                             | Yes, >30                          | 1.48 [1.33;1.65]                    | <0.001  | 2.21 [1.96;2.50]                    | <0.001  |
|                             | Yes, >50                          | 1.69 [1.51;1.88]                    | <0.001  | 2.24 [1.98;2.53]                    | <0.001  |
| Indoor/outdoor events       | No                                | Ref                                 | Ref     | Ref                                 | Ref     |
|                             | Indoor                            | 1.61 [1.49;1.75]                    | <0.001  | 2.38 [2.17;2.61]                    | <0.001  |
|                             | Outdoor                           | 1.23 [0.94;1.60]                    | 0.13    | 1.27 [0.96;1.67]                    | 0.096   |
| Primary employment          | Non-employed                      | Ref                                 | Ref     | Ref                                 | Ref     |
|                             | Student                           | 1.20 [1.03;1.39]                    | 0.019   | 2.75 [2.36;3.20]                    | <0.001  |
|                             | Public employee                   | 1.34 [1.18;1.51]                    | <0.001  | 4.29 [3.79;4.86]                    | <0.001  |
|                             | Private employee                  | 1.23 [1.09;1.40]                    | <0.001  | 2.08 [1.84;2.35]                    | <0.001  |
|                             | Self-employed                     | 1.37 [1.18;1.60]                    | <0.001  | 2.14 [1.83;2.49]                    | <0.001  |
|                             | Other                             | 1.04 [0.87;1.24]                    | 0.669   | 1.34 [1.12;1.59]                    | 0.0012  |
| Type of occupation          | Non-employed                      | Ref                                 | Ref     | Ref                                 | Ref     |
|                             | At home                           | 0.94 [0.83;1.06]                    | 0.2887  | 1.40 [1.24;1.58]                    | <0.001  |
|                             | Own office                        | 1.23 [1.07;1.42]                    | 0.0036  | 2.24 [1.94;2.59]                    | <0.001  |
|                             | Shared office                     | 1.35 [1.19;1.53]                    | <0.001  | 2.23 [1.97;2.53]                    | <0.001  |
|                             | Retail, library or factory worker | 1.47 [1.27;1.70]                    | <0.001  | 1.77 [1.53;2.06]                    | <0.001  |
|                             | Social care or education          | 1.49 [1.32;1.68]                    | <0.001  | 6.28 [5.52;7.15]                    | <0.001  |
|                             | Healthcare sector                 | 1.26 [1.10;1.43]                    | <0.001  | 7.95 [6.82;9.28]                    | <0.001  |
|                             | Transport (e.g. bus/taxi-driver)  | 1.32 [0.96;1.82]                    | 0.0853  | 1.90 [1.36;2.66]                    | <0.001  |
|                             | Outdoors (e.g. gardener)          | 1.20 [0.97;1.48]                    | 0.0877  | 1.37 [1.11;1.70]                    | 0.0033  |
|                             | Other                             | 1.28 [1.11;1.47]                    | <0.001  | 1.87 [1.62;2.15]                    | <0.001  |
| Contact to people at work   | No contact                        | Ref                                 | Ref     | Ref                                 | Ref     |
|                             | Yes, close                        | 1.26 [1.18;1.36]                    | <0.001  | 3.14 [2.90;3.40]                    | <0.001  |
|                             | Yes, other                        | 1.12 [1.05;1.20]                    | 0.0011  | 1.33 [1.24;1.43]                    | <0.001  |
| Household size              | Non-employed                      | 0.89 [0.80;1.00]                    | 0.0412  | 0.61 [0.55;0.68]                    | <0.001  |
|                             | 1 to 2 persons                    | Ref                                 | Ref     | Ref                                 | Ref     |
|                             | 3 to 4 persons                    | 0.93 [0.87;0.99]                    | 0.029   | 1.26 [1.17;1.35]                    | <0.001  |
| Education level             | >5 persons                        | 1.09 [0.96;1.23]                    | 0.184   | 1.77 [1.56;2.02]                    | <0.001  |
|                             | ISCED 0                           | Ref                                 | Ref     | Ref                                 | Ref     |
|                             | ISCED 1                           | 1.07 [0.96;1.18]                    | 0.24    | 1.38 [1.24;1.54]                    | <0.001  |
|                             | ISCED 2                           | 1.12 [1.01;1.25]                    | 0.04    | 1.82 [1.63;2.04]                    | <0.001  |
| Income                      | ISCED 3&4                         | 0.93 [0.83;1.05]                    | 0.25    | 1.36 [1.21;1.53]                    | <0.001  |
|                             | 1st quartile                      | Ref                                 | Ref     | Ref                                 | Ref     |
|                             | 2nd quartile                      | 0.89 [0.83;0.97]                    | 0.0059  | 1.07 [0.99;1.16]                    | 0.0997  |
|                             | 3rd quartile                      | 0.94 [0.87;1.02]                    | 0.1402  | 1.14 [1.05;1.24]                    | 0.0018  |
| Ethnicity                   | 4th quartile                      | 0.92 [0.84;1.00]                    | 0.0617  | 1.05 [0.97;1.15]                    | 0.2338  |
|                             | Danish                            | Ref                                 | Ref     | Ref                                 | Ref     |
|                             | Other                             | 1.22 [1.12;1.32]                    | <0.001  | 2.73 [2.47;3.01]                    | <0.001  |

**eTable 21. Symptomatic cases compared to symptomatic NC**

| Questions                            | Options                    | Cases compared to negative controls |                   |         |
|--------------------------------------|----------------------------|-------------------------------------|-------------------|---------|
|                                      |                            | Cases/controls                      | Rate Ratio [CI]   | P-value |
| Contact w/ SARS-Cov-2 positive       | None                       | 2104/4979                           | Ref               | Ref     |
|                                      | Other                      | 582/308                             | 4.23 [3.53; 5.06] | <0.001  |
| Daily contacts                       | Close (<2 meter, >30 min.) | 622/166                             | 8.78 [7.01;11.01] | <0.001  |
|                                      | <10                        | 1876/3184                           | Ref               | Ref     |
|                                      | 10 to 50                   | 1102/1841                           | 0.98 [0.87;1.10]  | 0.6881  |
| Bus travel                           | >50                        | 194/233                             | 1.40 [1.09;1.78]  | 0.0078  |
|                                      | No                         | 2095/3603                           | Ref               | Ref     |
| Train travel                         | Yes                        | 834/1450                            | 0.97 [0.86;1.10]  | 0.67    |
|                                      | No                         | 1533/2651                           | Ref               | Ref     |
| Ferry travel                         | Yes                        | 1464/2467                           | 1.00 [0.89;1.12]  | 0.96    |
|                                      | No                         | 2755/4771                           | Ref               | Ref     |
| Airplane travel                      | Yes                        | 126/219                             | 1.03 [0.78;1.36]  | 0.81    |
|                                      | No                         | 2818/4922                           | Ref               | Ref     |
| Indoor sports                        | Yes                        | 54/62                               | 1.40 [0.90;2.19]  | 0.14    |
|                                      | No                         | 2158/3965                           | Ref               | Ref     |
| Outdoor sports                       | Yes                        | 775/1061                            | 1.38 [1.21;1.57]  | <0.001  |
|                                      | No                         | 2540/4293                           | Ref               | Ref     |
| Visiting a gym                       | Yes                        | 343/704                             | 0.84 [0.70;1.00]  | 0.052   |
|                                      | No                         | 2094/3916                           | Ref               | Ref     |
| Use of public swimming pool or sauna | Yes                        | 832/1098                            | 1.43 [1.26;1.63]  | <0.001  |
|                                      | No                         | 2630/4510                           | Ref               | Ref     |
| Grocery shopping                     | Yes                        | 253/484                             | 0.90 [0.74;1.10]  | 0.3     |
|                                      | No                         | 140/126                             | Ref               | Ref     |
| Restaurants/cafés                    | Yes                        | 2952/5067                           | 0.56 [0.41;0.77]  | <0.001  |
|                                      | No                         | 1167/2298                           | Ref               | Ref     |
| Bar                                  | Yes                        | 1824/2781                           | 1.35 [1.20;1.51]  | <0.001  |
|                                      | No                         | 2223/4210                           | Ref               | Ref     |
| Wearing a mask                       | Yes                        | 677/789                             | 1.66 [1.43;1.93]  | <0.001  |
|                                      | No                         | 22/29                               | Ref               | Ref     |
| Frequent handwashing                 | Yes                        | 3187/5257                           | 0.53 [0.27;1.04]  | 0.066   |
|                                      | No                         | 276/714                             | Ref               | Ref     |
| Frequent hand sanitizer use          | Yes                        | 3047/4757                           | 1.76 [1.47;2.09]  | <0.001  |
|                                      | No                         | 183/326                             | Ref               | Ref     |
| Sneezing in elbow                    | Yes                        | 3140/5145                           | 0.86 [0.63;1.16]  | 0.32    |
|                                      | No                         | 301/590                             | Ref               | Ref     |
| Avoiding handshakes                  | Yes                        | 3022/4881                           | 1.05 [0.85;1.30]  | 0.65    |
|                                      | No                         | 278/444                             | Ref               | Ref     |
| Avoiding hugs                        | Yes                        | 3045/5027                           | 0.84 [0.67;1.06]  | 0.15    |
|                                      | No                         | 589/1060                            | Ref               | Ref     |
| Physical distancing                  | Yes                        | 2734/4411                           | 1.02 [0.88;1.19]  | 0.76    |
|                                      | No                         | 359/579                             | Ref               | Ref     |
| Limiting public transport            | Yes                        | 2964/4892                           | 0.86 [0.71;1.05]  | 0.15    |
|                                      | No                         | 985/1709                            | Ref               | Ref     |
| Avoiding social events               | Yes                        | 2338/3762                           | 1.06 [0.94;1.20]  | 0.35    |
|                                      | No                         | 875/1267                            | Ref               | Ref     |
| Staying more at home                 | Yes                        | 2448/4204                           | 0.77 [0.68;0.88]  | <0.001  |
|                                      | No                         | 1803/2543                           | Ref               | Ref     |
|                                      | Yes                        | 1520/2928                           | 0.76 [0.68;0.85]  | <0.001  |

**eTable 21. Symptomatic sases compared to symptomatic NC (continued)**

| Questions                   | Options                           | Cases compared to negative controls |                  |         |
|-----------------------------|-----------------------------------|-------------------------------------|------------------|---------|
|                             |                                   | Cases/controls                      | Rate Ratio [CI]  | P-value |
| Avoiding crowds             | No                                | 1022/1630                           | Ref              | Ref     |
|                             | Yes                               | 2301/3841                           | 0.93 [0.83;1.05] | 0.26    |
| Avoiding sports with others | No                                | 1678/2630                           | Ref              | Ref     |
|                             | Yes                               | 1645/2841                           | 0.90 [0.80;1.00] | 0.043   |
| Limiting traveling          | No                                | 646/1104                            | Ref              | Ref     |
|                             | Yes                               | 2677/4367                           | 1.01 [0.87;1.17] | 0.91    |
| Limiting grocery shopping   | No                                | 2003/3308                           | Ref              | Ref     |
|                             | Yes                               | 1320/2163                           | 0.99 [0.89;1.11] | 0.91    |
| Attending large events      | No                                | 2691/4850                           | Ref              | Ref     |
|                             | Yes, >30                          | 259/236                             | 1.91 [1.52;2.40] | <0.001  |
|                             | Yes, >50                          | 261/211                             | 2.13 [1.70;2.66] | <0.001  |
| Indoor/outdoor events       | No                                | 2691/4850                           | Ref              | Ref     |
|                             | Indoor                            | 478/404                             | 2.06 [1.73;2.45] | <0.001  |
|                             | Outdoor                           | 37/42                               | 1.44 [0.83;2.50] | 0.19    |
| Primary employment          | Non-employed                      | 258/384                             | Ref              | Ref     |
|                             | Student                           | 409/569                             | 1.24 [0.90;1.70] | 0.197   |
|                             | Public employee                   | 1090/1801                           | 1.39 [1.07;1.81] | 0.013   |
|                             | Private employee                  | 1113/2011                           | 1.18 [0.91;1.54] | 0.213   |
|                             | Self-employed                     | 216/345                             | 1.34 [0.97;1.84] | 0.072   |
|                             | Other                             | 92/155                              | 1.07 [0.70;1.63] | 0.754   |
| Type of occupation          | Non-employed                      | 299/430                             | Ref              | Ref     |
|                             | At home                           | 662/1436                            | 0.97 [0.76;1.25] | 0.836   |
|                             | Own office                        | 254/400                             | 1.32 [0.98;1.76] | 0.065   |
|                             | Shared office                     | 558/935                             | 1.28 [0.99;1.66] | 0.058   |
|                             | Retail, library or factory worker | 190/281                             | 1.36 [0.98;1.88] | 0.063   |
|                             | Social care or education          | 575/860                             | 1.39 [1.07;1.79] | 0.013   |
|                             | Healthcare sector                 | 331/419                             | 1.66 [1.25;2.20] | <0.001  |
|                             | Transport (e.g. bus/taxi-driver)  | 25/19                               | 2.30 [1.00;5.29] | 0.051   |
|                             | Outdoors (e.g. gardener)          | 60/111                              | 0.92 [0.57;1.48] | 0.736   |
|                             | Other                             | 215/351                             | 1.22 [0.90;1.65] | 0.209   |
| Contact to people at work   | No contact                        | 999/1905                            | Ref              | Ref     |
|                             | Yes, close                        | 856/1227                            | 1.40 [1.21;1.61] | <0.001  |
|                             | Yes, other                        | 982/1626                            | 1.16 [1.02;1.33] | 0.027   |
|                             | Non-employed                      | 321/485                             | 0.92 [0.73;1.16] | 0.473   |
| Household size              | 1 to 2 persons                    | 1974/2944                           | Ref              | Ref     |
|                             | 3 to 4 persons                    | 1075/2141                           | 0.77 [0.68;0.88] | <0.001  |
|                             | >5 persons                        | 208/325                             | 1.03 [0.80;1.34] | 0.81    |
| Education level             | ISCED 0                           | 399/636                             | Ref              | Ref     |
|                             | ISCED 1                           | 1080/1597                           | 1.17 [0.92;1.51] | 0.204   |
|                             | ISCED 2                           | 1049/1669                           | 1.28 [1.00;1.65] | 0.051   |
|                             | ISCED 3&4                         | 677/1439                            | 0.99 [0.76;1.28] | 0.926   |
| Income                      | 1st quartile                      | 911/1326                            | Ref              | Ref     |
|                             | 2nd quartile                      | 775/1385                            | 0.89 [0.76;1.04] | 0.156   |
|                             | 3rd quartile                      | 812/1396                            | 0.96 [0.82;1.14] | 0.667   |
|                             | 4th quartile                      | 759/1303                            | 0.84 [0.70;1.00] | 0.053   |
| Ethnicity                   | Danish                            | 2823/4955                           | Ref              | Ref     |
|                             | Other                             | 500/516                             | 1.62 [1.38;1.91] | <0.001  |

**eTable 22. Cases with unknown source of infection compared to NC and UC**

| Questions                   | Options  | Cases compared to negative controls |         | Cases compared to untested controls |         |
|-----------------------------|----------|-------------------------------------|---------|-------------------------------------|---------|
|                             |          | Rate Ratio [CI]                     | P-value | Questions                           | P-value |
| Daily contacts              | <10      | Ref                                 | Ref     | Ref                                 | Ref     |
|                             | 10 to 50 | 0.86 [0.78;0.95]                    | 0.0018  | 1.56 [1.41;1.72]                    | <0.001  |
|                             | >50      | 0.99 [0.81;1.22]                    | 0.9538  | 1.36 [1.10;1.68]                    | 0.0049  |
| Bus travel                  | No       | Ref                                 | Ref     | Ref                                 | Ref     |
|                             | Yes      | 0.93 [0.84;1.03]                    | 0.18    | 0.97 [0.87;1.08]                    | 0.58    |
| Train travel                | No       | Ref                                 | Ref     | Ref                                 | Ref     |
|                             | Yes      | 1.06 [0.96;1.16]                    | 0.26    | 1.23 [1.12;1.35]                    | <0.001  |
| Ferry travel                | No       | Ref                                 | Ref     | Ref                                 | Ref     |
|                             | Yes      | 0.86 [0.69;1.06]                    | 0.16    | 0.98 [0.79;1.22]                    | 0.86    |
| Airplane travel             | No       | Ref                                 | Ref     | Ref                                 | Ref     |
|                             | Yes      | 0.79 [0.58;1.06]                    | 0.12    | 1.52 [1.10;2.11]                    | 0.011   |
| Indoor sports               | No       | Ref                                 | Ref     | Ref                                 | Ref     |
|                             | Yes      | 1.26 [1.14;1.40]                    | <0.001  | 1.68 [1.50;1.87]                    | <0.001  |
| Outdoor sports              | No       | Ref                                 | Ref     | Ref                                 | Ref     |
|                             | Yes      | 0.71 [0.62;0.82]                    | <0.001  | 0.90 [0.78;1.04]                    | 0.16    |
| Visiting a gym              | No       | Ref                                 | Ref     | Ref                                 | Ref     |
|                             | Yes      | 1.52 [1.37;1.68]                    | <0.001  | 1.87 [1.69;2.08]                    | <0.001  |
| Use of public swimming pool | No       | Ref                                 | Ref     | Ref                                 | Ref     |
|                             | Yes      | 1.10 [0.94;1.28]                    | 0.24    | 1.31 [1.11;1.54]                    | 0.0011  |
| Grocery shopping            | No       | Ref                                 | Ref     | Ref                                 | Ref     |
|                             | Yes      | 0.58 [0.47;0.72]                    | <0.001  | 0.71 [0.57;0.88]                    | 0.0018  |
| Restaurants/cafés           | No       | Ref                                 | Ref     | Ref                                 | Ref     |
|                             | Yes      | 1.33 [1.22;1.46]                    | <0.001  | 1.77 [1.61;1.95]                    | <0.001  |
| Bar                         | No       | Ref                                 | Ref     | Ref                                 | Ref     |
|                             | Yes      | 1.67 [1.49;1.87]                    | <0.001  | 2.20 [1.96;2.47]                    | <0.001  |
| Wearing a mask              | No       | Ref                                 | Ref     | Ref                                 | Ref     |
|                             | Yes      | 1.26 [0.72;2.22]                    | 0.42    | 1.25 [0.72;2.17]                    | 0.44    |
| Frequent handwashing        | No       | Ref                                 | Ref     | Ref                                 | Ref     |
|                             | Yes      | 2.21 [1.00;4.92]                    | 0.051   | 2.46 [1.09;5.52]                    | 0.03    |
| Frequent hand sanitizer use | No       | Ref                                 | Ref     | Ref                                 | Ref     |
|                             | Yes      | 1.29 [1.04;1.61]                    | 0.021   | 1.66 [1.34;2.04]                    | <0.001  |
| Sneezing in elbow           | No       | Ref                                 | Ref     | Ref                                 | Ref     |
|                             | Yes      | 1.36 [1.16;1.60]                    | <0.001  | 1.66 [1.42;1.94]                    | <0.001  |
| Avoiding handshakes         | No       | Ref                                 | Ref     | Ref                                 | Ref     |
|                             | Yes      | 1.04 [0.88;1.23]                    | 0.61    | 1.05 [0.89;1.24]                    | 0.55    |
| Avoiding hugs               | No       | Ref                                 | Ref     | Ref                                 | Ref     |
|                             | Yes      | 1.10 [0.98;1.23]                    | 0.11    | 1.12 [0.99;1.25]                    | 0.063   |
| Physical distancing         | No       | Ref                                 | Ref     | Ref                                 | Ref     |
|                             | Yes      | 1.07 [0.92;1.24]                    | 0.37    | 1.05 [0.91;1.22]                    | 0.51    |
| Limiting public transport   | No       | Ref                                 | Ref     | Ref                                 | Ref     |
|                             | Yes      | 1.13 [1.03;1.24]                    | 0.011   | 1.10 [1.00;1.21]                    | 0.05    |
| Avoiding social events      | No       | Ref                                 | Ref     | Ref                                 | Ref     |
|                             | Yes      | 0.89 [0.81;0.98]                    | 0.019   | 0.85 [0.77;0.94]                    | 0.0014  |
| Staying more at home        | No       | Ref                                 | Ref     | Ref                                 | Ref     |
|                             | Yes      | 0.87 [0.79;0.95]                    | 0.0014  | 0.76 [0.69;0.83]                    | <0.001  |
| Avoiding crowds             | No       | Ref                                 | Ref     | Ref                                 | Ref     |
|                             | Yes      | 0.96 [0.88;1.05]                    | 0.39    | 0.94 [0.86;1.03]                    | 0.21    |
| Avoiding sports with others | No       | Ref                                 | Ref     | Ref                                 | Ref     |
|                             | Yes      | 0.91 [0.83;0.99]                    | 0.022   | 0.78 [0.71;0.85]                    | <0.001  |



**eTable 22. Cases with unknown source of infection compared to NC and UC  
(continued)**

| Questions                 | Options                           | Cases compared to negative controls |         | Cases compared to untested controls |         |
|---------------------------|-----------------------------------|-------------------------------------|---------|-------------------------------------|---------|
|                           |                                   | Rate Ratio [CI]                     | P-value | Rate Ratio [CI]                     | P-value |
| Limiting traveling        | No                                | Ref                                 | Ref     | Ref                                 | Ref     |
|                           | Yes                               | 1.07 [0.97;1.19]                    | 0.19    | 0.96 [0.86;1.07]                    | 0.48    |
| Limiting grocery shopping | No                                | Ref                                 | Ref     | Ref                                 | Ref     |
|                           | Yes                               | 1.07 [0.98;1.16]                    | 0.15    | 1.00 [0.91;1.09]                    | 0.95    |
| Attending large events    | No                                | Ref                                 | Ref     | Ref                                 | Ref     |
|                           | Yes, >30                          | 1.78 [1.52;2.09]                    | <0.001  | 2.67 [2.24;3.18]                    | <0.001  |
|                           | Yes, >50                          | 2.37 [2.03;2.77]                    | <0.001  | 3.22 [2.72;3.81]                    | <0.001  |
| Indoor/outdoor events     | No                                | Ref                                 | Ref     | Ref                                 | Ref     |
|                           | Indoor                            | 2.09 [1.85;2.35]                    | <0.001  | 3.08 [2.70;3.51]                    | <0.001  |
|                           | Outdoor                           | 1.69 [1.16;2.45]                    | 0.0057  | 1.93 [1.33;2.82]                    | <0.001  |
| Primary employment        | Non-employed                      | Ref                                 | Ref     | Ref                                 | Ref     |
|                           | Student                           | 1.06 [0.84;1.34]                    | 0.629   | 2.44 [1.93;3.09]                    | <0.001  |
|                           | Public employee                   | 1.09 [0.91;1.32]                    | 0.352   | 3.46 [2.86;4.18]                    | <0.001  |
|                           | Private employee                  | 1.08 [0.90;1.31]                    | 0.405   | 1.88 [1.56;2.27]                    | <0.001  |
|                           | Self-employed                     | 1.26 [1.00;1.59]                    | 0.046   | 1.97 [1.56;2.49]                    | <0.001  |
|                           | Other                             | 0.97 [0.74;1.27]                    | 0.807   | 1.20 [0.92;1.58]                    | 0.18    |
| Type of occupation        | Non-employed                      | Ref                                 | Ref     | Ref                                 | Ref     |
|                           | At home                           | 0.97 [0.81;1.17]                    | 0.7664  | 1.48 [1.24;1.77]                    | <0.001  |
|                           | Own office                        | 1.07 [0.86;1.33]                    | 0.5358  | 2.08 [1.67;2.59]                    | <0.001  |
|                           | Shared office                     | 1.17 [0.97;1.41]                    | 0.1094  | 2.00 [1.66;2.42]                    | <0.001  |
|                           | Retail, library or factory worker | 1.20 [0.95;1.52]                    | 0.1293  | 1.49 [1.18;1.89]                    | <0.001  |
|                           | Social care or education          | 1.00 [0.82;1.21]                    | 0.9855  | 4.12 [3.37;5.04]                    | <0.001  |
|                           | Healthcare sector                 | 1.14 [0.92;1.40]                    | 0.2211  | 7.45 [5.95;9.34]                    | <0.001  |
|                           | Transport (e.g. bus/taxi-driver)  | 1.82 [1.17;2.84]                    | 0.0078  | 2.44 [1.52;3.90]                    | <0.001  |
| Outdoors (e.g. gardener)  | Other                             | 1.03 [0.73;1.44]                    | 0.8842  | 1.18 [0.83;1.67]                    | 0.35    |
|                           | Other                             | 1.06 [0.85;1.32]                    | 0.6151  | 1.47 [1.18;1.83]                    | <0.001  |
|                           | Other                             | 1.06 [0.85;1.32]                    | 0.6151  | 1.47 [1.18;1.83]                    | <0.001  |
| Contact to people at work | No contact                        | Ref                                 | Ref     | Ref                                 | Ref     |
|                           | Yes, close                        | 0.95 [0.84;1.06]                    | 0.36    | 2.32 [2.05;2.64]                    | <0.001  |
|                           | Yes, other                        | 1.03 [0.93;1.14]                    | 0.58    | 1.22 [1.09;1.36]                    | <0.001  |
| Household size            | Non-employed                      | 0.92 [0.78;1.08]                    | 0.31    | 0.61 [0.52;0.72]                    | <0.001  |
|                           | 1 to 2 persons                    | Ref                                 | Ref     | Ref                                 | Ref     |
|                           | 3 to 4 persons                    | 0.87 [0.78;0.97]                    | 0.013   | 1.19 [1.07;1.33]                    | 0.0015  |
| Education level           | >5 persons                        | 0.95 [0.78;1.17]                    | 0.646   | 1.57 [1.28;1.94]                    | <0.001  |
|                           | ISCED 0                           | Ref                                 | Ref     | Ref                                 | Ref     |
|                           | ISCED 1                           | 1.07 [0.91;1.27]                    | 0.41    | 1.43 [1.21;1.70]                    | <0.001  |
|                           | ISCED 2                           | 1.15 [0.96;1.37]                    | 0.12    | 1.89 [1.58;2.25]                    | <0.001  |
| Income                    | ISCED 3&4                         | 0.98 [0.82;1.18]                    | 0.85    | 1.46 [1.21;1.76]                    | <0.001  |
|                           | 1st quartile                      | Ref                                 | Ref     | Ref                                 | Ref     |
|                           | 2nd quartile                      | 0.78 [0.68;0.88]                    | <0.001  | 0.88 [0.78;1.00]                    | 0.048   |
|                           | 3rd quartile                      | 0.80 [0.71;0.92]                    | <0.001  | 0.97 [0.86;1.11]                    | 0.693   |
| Ethnicity                 | 4th quartile                      | 0.85 [0.74;0.97]                    | 0.02    | 0.98 [0.85;1.12]                    | 0.726   |
|                           | Danish                            | Ref                                 | Ref     | Ref                                 | Ref     |
|                           | Other                             | 1.45 [1.29;1.64]                    | <0.001  | 3.28 [2.86;3.76]                    | <0.001  |
